# Supplementary material for: Druggable epigenetic suppression of interferon-induced chemokine expression linked to MYCN amplification in neuroblastoma
Source: J Immunother Cancer. 2021 May 20;9(5):e001335. doi: 10.1136/jitc-2020-001335 (PMC8141444; doi:10.1136/jitc-2020-001335)
Supplement: Supplementary data [file jitc-2020-001335supp003.xlsx]

## Sheet: SK-N-BE_EPZ011989_Response
GeneID	Symbol	logFC	AveExpr	t	P.Value	adj.P.Val	B
2019	EN1	6.67008	2.05479	42.7097	1.76426e-31	1.91987e-27	58.087
10481	HOXB13	6.90504	-1.80906	34.9243	1.57683e-28	8.57951e-25	52.7809
1641	DCX	2.36402	7.16063	18.7093	1.19044e-19	4.31813e-16	34.5173
5307	PITX1	3.54319	4.49186	18.4214	1.93945e-19	5.27627e-16	34.0529
4824	NKX3-1	3.51663	3.23824	17.7723	5.96717e-19	1.29869e-15	32.9801
10659	CELF2	3.1156	5.01069	17.2767	1.43933e-18	2.34588e-15	32.1365
149297	FAM78B	2.84868	4.97338	17.2504	1.50902e-18	2.34588e-15	32.0911
6495	SIX1	4.29374	4.82466	16.8597	3.06764e-18	3.88825e-15	31.4094
3202	HOXA5	8.9635	-0.583409	16.834	3.21579e-18	3.88825e-15	31.364
59284	CACNG7	5.55694	0.726907	16.464	6.37722e-18	6.93969e-15	30.7044
57568	SIPA1L2	2.92074	5.04091	15.5136	3.91728e-17	3.87526e-14	28.9488
6886	TAL1	4.79399	0.992281	15.4157	4.74583e-17	4.30367e-14	28.7627
4674	NAP1L2	7.15277	-1.23944	15.3724	5.1671e-17	4.32526e-14	28.6802
80139	ZNF703	2.51744	5.63987	14.6634	2.13726e-16	1.66126e-13	27.2996
2335	FN1	2.08447	6.59364	14.0573	7.49125e-16	5.00666e-13	26.0759
163782	KANK4	3.73734	3.41107	14.0121	8.23746e-16	5.00666e-13	25.9831
5087	PBX1	1.18739	7.4701	14.0114	8.24963e-16	5.00666e-13	25.9816
114299	PALM2	3.22425	1.98526	14.0096	8.28156e-16	5.00666e-13	25.9778
9454	HOMER3	2.03811	5.13349	13.9784	8.84444e-16	5.06553e-13	25.9136
4756	NEO1	1.36964	5.97578	13.942	9.55173e-16	5.19709e-13	25.8384
23314	SATB2	2.202	4.19988	13.7865	1.32833e-15	6.8833e-13	25.5158
10916	MAGED2	1.39824	6.98192	13.6852	1.64941e-15	8.15858e-13	25.3039
102724235	NA	5.63585	-1.73826	13.5852	2.04427e-15	9.67205e-13	25.0938
1400	CRMP1	1.81353	6.80904	13.1775	4.96096e-15	2.16828e-12	24.2247
100506311	HOTAIRM1	8.82257	-0.777494	13.1715	5.02676e-15	2.16828e-12	24.2118
84629	TNRC18	2.4245	4.23701	13.1578	5.18059e-15	2.16828e-12	24.1822
100129654	TCF24	7.73274	-1.44417	13.0841	6.09426e-15	2.45621e-12	24.0228
6659	SOX4	1.38051	9.72863	13.0252	6.94309e-15	2.69838e-12	23.8948
55691	FRMD4A	2.38059	3.678	12.7019	1.4293e-14	5.36332e-12	23.1854
1191	CLU	-1.63438	5.31329	-12.6354	1.66059e-14	6.0235e-12	23.0379
1879	EBF1	1.38978	5.20642	12.5081	2.21631e-14	7.64912e-12	22.7539
56256	SERTAD4	1.97795	4.00763	12.4917	2.30048e-14	7.64912e-12	22.7172
27345	KCNMB4	3.5877	3.06243	12.4881	2.31962e-14	7.64912e-12	22.7091
2737	GLI3	6.52839	3.16686	12.4039	2.81105e-14	8.99701e-12	22.5199
4487	MSX1	2.76303	3.66545	12.244	4.05918e-14	1.26206e-11	22.1581
10231	RCAN2	5.99038	-1.24746	12.2219	4.27091e-14	1.291e-11	22.1081
9355	LHX2	3.79517	2.71787	12.203	4.46164e-14	1.30977e-11	22.065
167410	LIX1	6.11464	1.49166	12.1923	4.57372e-14	1.30977e-11	22.0406
128553	TSHZ2	1.93516	4.72636	12.1807	4.69771e-14	1.31078e-11	22.0142
5522	PPP2R2C	5.30552	2.09506	11.9998	7.15481e-14	1.94647e-11	21.5996
10642	IGF2BP1	0.888755	8.72252	11.8952	9.1422e-14	2.42647e-11	21.3579
10769	PLK2	3.14719	3.00974	11.8228	1.08392e-13	2.80837e-11	21.1899
3200	HOXA3	8.73315	-0.551989	11.6544	1.61525e-13	4.08771e-11	20.7963
6252	RTN1	6.04743	4.52187	11.6097	1.79655e-13	4.44319e-11	20.6912
4208	MEF2C	7.28296	-1.12542	11.5861	1.9005e-13	4.56885e-11	20.6357
8531	YBX3	6.22095	3.12	11.5794	1.93133e-13	4.56885e-11	20.6198
3764	KCNJ8	-1.43792	4.92632	-11.4803	2.44855e-13	5.66917e-11	20.3855
10410	IFITM3	2.70474	5.34785	11.4459	2.65908e-13	6.02836e-11	20.304
3207	HOXA11	6.10254	-1.01946	11.4106	2.89513e-13	6.42955e-11	20.22
5654	HTRA1	4.01356	3.26409	11.319	3.6116e-13	7.86029e-11	20.0015
23180	RFTN1	1.53653	4.72928	11.2547	4.22062e-13	9.00564e-11	19.8475
9976	CLEC2B	5.5351	-1.42933	11.2362	4.41525e-13	9.23977e-11	19.8029
90102	PHLDB2	1.95803	4.52099	11.1795	5.06913e-13	1.0408e-10	19.6664
253959	RALGAPA1	-1.43158	5.63763	-11.0453	7.0391e-13	1.41851e-10	19.3417
6383	SDC2	1.2709	6.02614	10.96	8.68348e-13	1.71807e-10	19.134
9788	MTSS1	-1.70681	3.92991	-10.9468	8.97114e-13	1.7303e-10	19.1018
219654	ZCCHC24	1.92773	4.67286	10.9426	9.0633e-13	1.7303e-10	19.0917
3239	HOXD13	1.1876	5.81291	10.9021	1.00179e-12	1.87957e-10	18.9926
1381	CRABP1	1.79549	4.9026	10.881	1.0556e-12	1.94696e-10	18.9408
91851	CHRDL1	4.4612	1.23858	10.8706	1.0831e-12	1.96438e-10	18.9153
145407	C14orf37	4.16585	3.09175	10.8385	1.17271e-12	2.09204e-10	18.8367
10608	MXD4	1.25862	5.66542	10.8266	1.20785e-12	2.11997e-10	18.8074
11013	TMSB15A	1.57264	6.4804	10.7802	1.35557e-12	2.34147e-10	18.6932
26011	TENM4	2.20094	4.71851	10.7526	1.45211e-12	2.46904e-10	18.6251
445	ASS1	-1.38623	8.57256	-10.7318	1.52928e-12	2.56025e-10	18.5739
9935	MAFB	3.04795	3.9133	10.7188	1.57986e-12	2.60485e-10	18.5417
64759	TNS3	2.55037	2.84355	10.6965	1.67056e-12	2.7133e-10	18.4864
710	SERPING1	1.42145	6.33962	10.4831	2.85654e-12	4.5713e-10	17.9551
26053	AUTS2	1.12162	6.73743	10.4686	2.96272e-12	4.67251e-10	17.9189
91607	SLFN11	5.55227	-0.60769	10.4488	3.11498e-12	4.84245e-10	17.8693
8929	PHOX2B	-1.28457	9.60492	-10.4328	3.24444e-12	4.97267e-10	17.8289
2535	FZD2	1.10975	6.33586	10.3442	4.06254e-12	6.14008e-10	17.6061
7026	NR2F2	1.03409	6.78717	10.1911	6.00838e-12	8.9566e-10	17.2182
10581	IFITM2	2.45974	4.37339	10.1712	6.32401e-12	9.29971e-10	17.1674
6572	SLC18A3	-2.23472	3.40578	-10.1612	6.48719e-12	9.41249e-10	17.1421
3217	HOXB7	7.28025	-0.635994	10.1423	6.81075e-12	9.75192e-10	17.0939
7351	UCP2	-1.31824	6.76165	-10.1331	6.97345e-12	9.8552e-10	17.0705
5218	CDK14	2.97312	3.03822	10.0537	8.55868e-12	1.19405e-09	16.8673
6299	SALL1	4.95599	1.53497	10.0081	9.62975e-12	1.32647e-09	16.7504
2697	GJA1	4.55297	2.92093	9.94172	1.14393e-11	1.55602e-09	16.5796
894	CCND2	7.58394	-0.296615	9.85304	1.44107e-11	1.93602e-09	16.3505
3044	HBBP1	5.95249	-1.89909	9.84341	1.47779e-11	1.96113e-09	16.3255
2139	EYA2	3.87991	3.28938	9.82728	1.54136e-11	2.02085e-09	16.2837
11167	FSTL1	1.67159	4.85027	9.75285	1.87301e-11	2.42645e-09	16.0903
4646	MYO6	0.970833	6.54764	9.74247	1.92468e-11	2.46405e-09	16.0633
677	ZFP36L1	2.20374	6.6986	9.71838	2.05039e-11	2.59446e-09	16.0005
8935	SKAP2	6.27505	0.517002	9.69239	2.19539e-11	2.746e-09	15.9327
3123	HLA-DRB1	4.94334	-0.0782766	9.67503	2.29803e-11	2.84172e-09	15.8874
768211	RELL1	-1.32776	4.37963	-9.64393	2.49434e-11	3.01764e-09	15.806
9378	NRXN1	1.73995	2.9964	9.64371	2.49575e-11	3.01764e-09	15.8055
5063	PAK3	2.37778	3.94918	9.59833	2.81344e-11	3.33233e-09	15.6865
5789	PTPRD	3.20437	1.34387	9.59379	2.84745e-11	3.33233e-09	15.6746
7025	NR2F1	1.88473	4.24344	9.59373	2.84789e-11	3.33233e-09	15.6744
284217	LAMA1	1.90346	2.8676	9.56528	3.07051e-11	3.55461e-09	15.5997
28951	TRIB2	1.02543	7.05464	9.54999	3.19735e-11	3.66248e-09	15.5595
441631	TSPAN11	1.83947	3.79913	9.5253	3.41367e-11	3.83188e-09	15.4945
60468	BACH2	2.00666	3.40107	9.52508	3.41566e-11	3.83188e-09	15.494
84968	PNMA6A	1.39767	4.42825	9.4762	3.88912e-11	4.31851e-09	15.3651
26064	RAI14	0.737524	8.54129	9.46556	4.0008e-11	4.35688e-09	15.337
8091	HMGA2	8.91618	-0.0313163	9.46245	4.03402e-11	4.35688e-09	15.3288
1277	COL1A1	1.63991	5.60271	9.46154	4.04379e-11	4.35688e-09	15.3264
3488	IGFBP5	1.85238	6.24216	9.42348	4.47527e-11	4.7745e-09	15.2257
26470	SEZ6L2	1.63514	6.56911	9.41776	4.54409e-11	4.80086e-09	15.2105
23179	RGL1	1.46206	4.58703	9.3838	4.97517e-11	5.20575e-09	15.1205
273	AMPH	4.18289	2.33337	9.33414	5.68172e-11	5.88843e-09	14.9887
5137	PDE1C	4.3158	1.46006	9.307	6.1104e-11	6.22958e-09	14.9164
92521	SPECC1	1.55909	3.42566	9.30608	6.12539e-11	6.22958e-09	14.914
6899	TBX1	4.01517	3.26208	9.27674	6.62713e-11	6.67745e-09	14.8358
6769	STAC	-1.06658	4.9539	-9.25614	7.00419e-11	6.92631e-09	14.7808
84530	SRRM4	3.41874	4.13983	9.25307	7.06226e-11	6.92631e-09	14.7726
4067	LYN	-1.29197	6.25393	-9.25292	7.06506e-11	6.92631e-09	14.7722
11031	RAB31	1.05676	5.7053	9.22295	7.65837e-11	7.44092e-09	14.6921
93183	PIGM	1.1579	6.4124	9.20936	7.9439e-11	7.65005e-09	14.6558
51299	NRN1	6.0563	0.678199	9.15452	9.21026e-11	8.74252e-09	14.5088
6493	SIM2	2.74941	2.5739	9.15337	9.23902e-11	8.74252e-09	14.5057
1993	ELAVL2	0.76816	6.89008	9.10605	1.05e-10	9.85008e-09	14.3787
3785	KCNQ2	1.49739	5.88887	9.10237	1.06052e-10	9.86373e-09	14.3687
3209	HOXA13	6.40105	-0.748717	9.06033	1.18851e-10	1.09604e-08	14.2556
10570	DPYSL4	1.62226	5.49579	9.0568	1.19995e-10	1.09729e-08	14.246
7546	ZIC2	4.72727	0.203558	8.9934	1.42557e-10	1.28226e-08	14.0749
9823	ARMCX2	1.3172	4.63522	8.99335	1.42578e-10	1.28226e-08	14.0747
347735	SERINC2	1.69017	3.98392	8.97772	1.48777e-10	1.32704e-08	14.0324
6909	TBX2	1.30418	7.63004	8.96865	1.52498e-10	1.34917e-08	14.0079
3127	HLA-DRB5	5.89772	-0.611388	8.95459	1.58454e-10	1.39056e-08	13.9698
3119	HLA-DQB1	4.32982	-1.39099	8.94115	1.64372e-10	1.43096e-08	13.9334
101927074	LINC00682	-1.66443	5.17971	-8.91591	1.76096e-10	1.52086e-08	13.8649
9915	ARNT2	1.11161	4.90725	8.90672	1.80574e-10	1.54725e-08	13.84
652	BMP4	3.67091	2.16404	8.8666	2.01521e-10	1.71324e-08	13.7309
5774	PTPN3	2.58737	2.49092	8.84926	2.11323e-10	1.77793e-08	13.6837
7078	TIMP3	1.72086	3.54657	8.8474	2.12398e-10	1.77793e-08	13.6787
26052	DNM3	1.56172	3.26259	8.80754	2.36937e-10	1.96821e-08	13.57
55086	CXorf57	4.96499	0.042445	8.79302	2.46574e-10	2.03274e-08	13.5304
140578	CHODL	1.60992	4.05689	8.7782	2.56825e-10	2.10133e-08	13.4899
56978	PRDM8	1.11206	5.95093	8.76654	2.65198e-10	2.15364e-08	13.458
81557	MAGED4B	1.08778	5.27878	8.71612	3.04696e-10	2.45607e-08	13.32
8642	DCHS1	1.66193	4.56332	8.69387	3.23975e-10	2.5834e-08	13.2591
1748	DLX4	2.40708	4.054	8.69246	3.2524e-10	2.5834e-08	13.2552
9955	HS3ST3A1	1.6473	4.42254	8.68809	3.29187e-10	2.59581e-08	13.2432
23254	KAZN	1.52192	4.47243	8.66578	3.50107e-10	2.74091e-08	13.182
91584	PLXNA4	2.47458	2.55634	8.65155	3.64161e-10	2.83057e-08	13.1428
3280	HES1	2.69333	3.21979	8.64442	3.71412e-10	2.86646e-08	13.1232
57502	NLGN4X	1.70068	4.79283	8.60009	4.19908e-10	3.21791e-08	13.0013
54749	EPDR1	2.52884	3.03314	8.53564	5.02159e-10	3.82132e-08	12.8235
23432	GPR161	0.98272	5.21822	8.49446	5.63113e-10	4.25541e-08	12.7096
5243	ABCB1	4.06503	1.45888	8.48182	5.83296e-10	4.37753e-08	12.6746
83439	TCF7L1	1.38465	4.85269	8.44275	6.50441e-10	4.84802e-08	12.5663
579	NKX3-2	4.62504	0.76891	8.43539	6.63945e-10	4.88398e-08	12.5459
51310	SLC22A17	0.953249	5.07436	8.43439	6.65791e-10	4.88398e-08	12.5431
79145	CHCHD7	1.514	3.98145	8.43281	6.68731e-10	4.88398e-08	12.5387
2260	FGFR1	0.88561	6.25105	8.42693	6.79802e-10	4.92833e-08	12.5224
4750	NEK1	-0.650149	6.992	-8.4248	6.83862e-10	4.92833e-08	12.5165
3142	HLX	1.13609	5.10186	8.40743	7.17871e-10	5.13939e-08	12.4682
2138	EYA1	-1.24241	5.56753	-8.38554	7.63201e-10	5.42821e-08	12.4074
168544	ZNF467	2.49358	2.39517	8.36751	8.02698e-10	5.67205e-08	12.3572
8848	TSC22D1	0.88372	6.08835	8.33606	8.76666e-10	6.15476e-08	12.2696
8492	PRSS12	-1.0002	6.42505	-8.32238	9.10956e-10	6.3545e-08	12.2314
53834	FGFRL1	2.70732	3.99067	8.30997	9.43224e-10	6.53769e-08	12.1968
153090	DAB2IP	0.933036	5.08395	8.2938	9.87059e-10	6.79822e-08	12.1517
84870	RSPO3	4.55826	-0.5134	8.28102	1.02315e-09	7.00249e-08	12.116
2294	FOXF1	2.08877	-0.177356	8.18598	1.33715e-09	9.09432e-08	11.8499
11096	ADAMTS5	2.1308	4.42761	8.15602	1.45522e-09	9.83584e-08	11.7658
283638	CEP170B	1.76495	3.94454	8.1368	1.53646e-09	1.03208e-07	11.7118
84913	ATOH8	1.61393	5.16461	8.12284	1.59835e-09	1.06707e-07	11.6725
3955	LFNG	-1.792	3.24903	-8.09979	1.70616e-09	1.1321e-07	11.6076
2983	GUCY1B3	-1.54548	3.76691	-8.09241	1.74221e-09	1.14902e-07	11.5868
6934	TCF7L2	1.01698	6.53667	8.08595	1.77439e-09	1.16319e-07	11.5687
9516	LITAF	1.2293	4.94037	8.06957	1.85871e-09	1.21116e-07	11.5225
3229	HOXC13	4.44171	-0.0643229	8.04381	1.99968e-09	1.29527e-07	11.4498
9741	LAPTM4A	0.499672	9.20986	8.02876	2.08696e-09	1.3438e-07	11.4074
85369	STRIP1	0.704648	6.43203	8.02571	2.10516e-09	1.34755e-07	11.3987
84733	CBX2	0.753716	6.87954	8.00106	2.25792e-09	1.43688e-07	11.3291
85301	COL27A1	3.10569	3.60364	7.99894	2.27156e-09	1.43716e-07	11.3231
2977	GUCY1A2	2.48888	2.84642	7.99455	2.30013e-09	1.44682e-07	11.3107
83862	TMEM120A	-1.4393	3.83382	-7.96811	2.47989e-09	1.55093e-07	11.2359
9124	PDLIM1	1.06711	5.72057	7.96579	2.49636e-09	1.55231e-07	11.2293
157627	LINC00599	3.08162	1.27666	7.96348	2.51281e-09	1.55366e-07	11.2228
11075	STMN2	1.40848	8.01246	7.95894	2.54555e-09	1.56501e-07	11.2099
3815	KIT	3.22219	2.18821	7.92902	2.77218e-09	1.69477e-07	11.1251
10252	SPRY1	1.77867	3.9762	7.91963	2.84742e-09	1.73104e-07	11.0985
51566	ARMCX3	0.804513	6.77019	7.91557	2.88057e-09	1.74146e-07	11.087
57620	STIM2	0.923904	5.63224	7.89405	3.06315e-09	1.84162e-07	11.0259
51804	SIX4	1.06565	3.73448	7.88302	3.16118e-09	1.88869e-07	10.9946
57338	JPH3	1.95406	2.89421	7.88137	3.17616e-09	1.88869e-07	10.9899
23002	DAAM1	0.942772	6.01164	7.87658	3.21994e-09	1.90432e-07	10.9763
85444	LRRCC1	0.802509	5.8459	7.81827	3.80462e-09	2.23794e-07	10.8104
6595	SMARCA2	3.70766	3.42382	7.80737	3.92534e-09	2.29654e-07	10.7794
256987	SERINC5	-2.02938	2.93551	-7.79224	4.09935e-09	2.38551e-07	10.7362
126299	ZNF428	0.650414	8.81879	7.77941	4.25307e-09	2.4618e-07	10.6996
54873	PALMD	1.45504	5.40019	7.77571	4.29844e-09	2.4749e-07	10.6891
54556	ING3	0.982771	4.93245	7.74131	4.74465e-09	2.71743e-07	10.5909
1114	CHGB	-1.34688	8.04543	-7.7378	4.79271e-09	2.73059e-07	10.5809
55000	TUG1	0.642981	7.6547	7.70458	5.27327e-09	2.98874e-07	10.4859
7832	BTG2	0.966807	4.70302	7.69174	5.4718e-09	3.08519e-07	10.4492
375790	AGRN	1.42706	4.05562	7.67342	5.76814e-09	3.23551e-07	10.3968
1123	CHN1	-0.683307	6.27538	-7.6703	5.82022e-09	3.24372e-07	10.3878
4651	MYO10	1.02476	5.2423	7.66898	5.8424e-09	3.24372e-07	10.3841
5327	PLAT	1.77201	3.98156	7.6643	5.92168e-09	3.27105e-07	10.3707
3221	HOXC4	-0.883439	5.26797	-7.66207	5.95986e-09	3.27552e-07	10.3643
7545	ZIC1	1.07556	4.36582	7.65208	6.13407e-09	3.35432e-07	10.3356
10788	IQGAP2	2.14477	3.01497	7.62921	6.55227e-09	3.56509e-07	10.2701
9261	MAPKAPK2	0.667188	6.99722	7.62033	6.72237e-09	3.63944e-07	10.2446
114991	ZNF618	0.577217	6.91835	7.60035	7.12175e-09	3.83658e-07	10.1873
25817	FAM19A5	1.24777	4.44811	7.57521	7.65847e-09	4.10539e-07	10.115
29994	BAZ2B	0.819906	7.24751	7.55932	8.01854e-09	4.25888e-07	10.0694
7216	TRO	0.864825	5.86514	7.55913	8.02307e-09	4.25888e-07	10.0688
6511	SLC1A6	5.67374	-0.837598	7.55461	8.12867e-09	4.29399e-07	10.0558
4488	MSX2	1.9655	3.18595	7.53994	8.48121e-09	4.45857e-07	10.0136
63950	DMRTA2	2.8385	1.96836	7.53193	8.68019e-09	4.54124e-07	9.99058
3728	JUP	1.06165	5.49268	7.51948	8.999e-09	4.68551e-07	9.95474
7414	VCL	0.808823	5.19776	7.50888	9.27981e-09	4.80871e-07	9.9242
57447	NDRG2	0.91144	5.70947	7.50667	9.33933e-09	4.81661e-07	9.91785
4914	NTRK1	1.34926	5.19614	7.48674	9.8949e-09	5.07907e-07	9.86042
131096	KCNH8	-2.47867	1.9561	-7.45963	1.0705e-08	5.46911e-07	9.78222
284106	CISD3	-1.09545	3.87041	-7.44011	1.13297e-08	5.76118e-07	9.72587
57698	SHTN1	1.56157	3.62889	7.43745	1.14174e-08	5.7788e-07	9.7182
23090	ZNF423	1.41123	4.13709	7.42269	1.19181e-08	6.00428e-07	9.67555
59336	PRDM13	2.13595	2.56816	7.39147	1.3051e-08	6.54038e-07	9.58533
83643	CCDC3	1.05185	5.29891	7.39012	1.31024e-08	6.54038e-07	9.58142
7022	TFAP2C	3.49401	-0.217674	7.37009	1.38892e-08	6.90149e-07	9.52347
23406	COTL1	1.30902	4.80631	7.36398	1.41386e-08	6.99348e-07	9.50579
84858	ZNF503	0.982677	6.70878	7.35873	1.43568e-08	7.06925e-07	9.49057
3241	HPCAL1	-1.04511	6.43099	-7.33865	1.52219e-08	7.46147e-07	9.43244
4919	ROR1	1.2859	3.88763	7.33562	1.53572e-08	7.47266e-07	9.42364
25759	SHC2	1.36945	3.74864	7.33506	1.53821e-08	7.47266e-07	9.42204
54470	ARMCX6	0.840578	4.64947	7.32542	1.5821e-08	7.62328e-07	9.39408
5156	PDGFRA	1.76534	4.0211	7.32517	1.58322e-08	7.62328e-07	9.39338
153478	PLEKHG4B	4.17078	1.37891	7.31282	1.64134e-08	7.86831e-07	9.35756
81606	LBH	1.92641	3.09284	7.30949	1.65736e-08	7.89439e-07	9.34791
2115	ETV1	1.10476	5.13447	7.30868	1.66129e-08	7.89439e-07	9.34556
10644	IGF2BP2	0.73346	5.78829	7.29343	1.73692e-08	8.21792e-07	9.30132
63916	ELMO2	0.749548	4.59294	7.2846	1.78231e-08	8.39615e-07	9.2757
1745	DLX1	5.17253	0.261488	7.27987	1.80711e-08	8.47628e-07	9.26197
25907	TMEM158	1.62125	4.62785	7.26613	1.88113e-08	8.7856e-07	9.22209
5139	PDE3A	2.77599	1.55435	7.26418	1.89188e-08	8.79806e-07	9.21642
7781	SLC30A3	1.65264	4.00514	7.25608	1.93724e-08	8.97064e-07	9.19289
10205	MPZL2	5.99643	-1.06678	7.25456	1.94584e-08	8.9723e-07	9.18849
1621	DBH	-1.61801	5.32122	-7.25101	1.96615e-08	9.02771e-07	9.17817
5453	POU3F1	2.88794	1.9505	7.24617	1.99421e-08	9.08463e-07	9.16409
8854	ALDH1A2	5.97729	-0.48087	7.24599	1.99525e-08	9.08463e-07	9.16358
2719	GPC3	1.28123	6.05605	7.21544	2.18183e-08	9.89277e-07	9.07477
8828	NRP2	1.21662	4.45924	7.20976	2.21844e-08	1.0017e-06	9.05824
9674	KIAA0040	2.33194	2.74959	7.20596	2.24326e-08	1.00872e-06	9.04719
64762	GAREM1	1.1218	3.64401	7.18587	2.37929e-08	1.06549e-06	8.98871
6840	SVIL	1.40995	3.88155	7.18404	2.39208e-08	1.06683e-06	8.98338
548596	CKMT1A	-1.25751	4.44463	-7.15225	2.62578e-08	1.16628e-06	8.89079
2296	FOXC1	1.00913	5.8148	7.14506	2.68177e-08	1.1863e-06	8.86984
120103	SLC36A4	-0.984046	4.94876	-7.13597	2.7543e-08	1.21345e-06	8.84333
92558	BICDL1	2.29626	1.589	7.10806	2.98955e-08	1.31179e-06	8.76193
994	CDC25B	-0.752495	7.01628	-7.09735	3.08518e-08	1.34831e-06	8.73066
79776	ZFHX4	0.845824	5.76639	7.06854	3.35786e-08	1.46161e-06	8.64655
56977	STOX2	0.803511	5.02885	7.05828	3.4608e-08	1.50042e-06	8.61656
2059	EPS8	1.49134	3.9189	7.05338	3.51107e-08	1.51617e-06	8.60224
7046	TGFBR1	0.929844	5.32624	7.04799	3.56722e-08	1.53433e-06	8.58648
91775	NXPE3	-0.63529	5.14083	-7.04183	3.63249e-08	1.55625e-06	8.56848
25999	CLIP3	0.978814	5.33782	7.02105	3.86175e-08	1.64798e-06	8.5077
1943	EFNA2	0.886475	4.95259	7.015	3.93121e-08	1.67107e-06	8.49
54331	GNG2	0.898532	5.3052	7.01162	3.97054e-08	1.68122e-06	8.48011
400916	CHCHD10	-0.8639	6.07432	-6.97053	4.4819e-08	1.89039e-06	8.35982
10982	MAPRE2	0.589673	6.13979	6.93477	4.98088e-08	2.09274e-06	8.25502
9771	RAPGEF5	-1.17667	5.12806	-6.92933	5.06154e-08	2.11845e-06	8.23907
10712	FAM189B	-0.754906	4.81545	-6.92235	5.16696e-08	2.15429e-06	8.21861
9230	RAB11B	0.532795	6.80939	6.91271	5.31625e-08	2.20807e-06	8.19033
1749	DLX5	1.39985	3.83693	6.91047	5.35158e-08	2.21429e-06	8.18375
1153	CIRBP	0.526867	8.3555	6.90905	5.37407e-08	2.21517e-06	8.17959
57492	ARID1B	0.605182	6.85873	6.87104	6.01346e-08	2.46938e-06	8.068
122786	FRMD6	1.4016	3.38129	6.85086	6.38352e-08	2.60953e-06	8.00872
27319	BHLHE22	3.4074	1.68466	6.84985	6.40271e-08	2.60953e-06	8.00574
400954	EML6	-2.00282	3.38276	-6.84746	6.44816e-08	2.61824e-06	7.99872
23287	AGTPBP1	-0.7324	6.29539	-6.84531	6.48925e-08	2.62513e-06	7.99241
51460	SFMBT1	1.15408	4.1754	6.82514	6.88882e-08	2.77645e-06	7.9331
728392	LOC728392	0.920605	3.9861	6.81886	7.01821e-08	2.81816e-06	7.91463
5764	PTN	-0.74603	7.72859	-6.80415	7.3308e-08	2.93286e-06	7.87139
4781	NFIB	0.86999	6.70472	6.79681	7.49211e-08	2.98641e-06	7.84978
10611	PDLIM5	-0.758587	6.19154	-6.77983	7.87903e-08	3.12918e-06	7.79981
8322	FZD4	2.23939	2.24886	6.76042	8.34616e-08	3.30265e-06	7.74265
84441	MAML2	1.6696	2.59778	6.74777	8.66534e-08	3.40762e-06	7.70541
3709	ITPR2	-1.38652	5.65472	-6.74743	8.67407e-08	3.40762e-06	7.70441
4990	SIX6	2.35815	0.283302	6.74464	8.74639e-08	3.42368e-06	7.69617
22836	RHOBTB3	0.528868	8.19886	6.73893	8.89587e-08	3.46971e-06	7.67936
3716	JAK1	0.585895	5.76275	6.73496	9.00141e-08	3.49833e-06	7.66765
23057	NMNAT2	1.99232	4.43695	6.72646	9.23157e-08	3.57501e-06	7.6426
90007	MIDN	0.90404	8.31489	6.7177	9.47492e-08	3.65624e-06	7.61678
2512	FTL	-0.585017	9.78123	-6.71484	9.55563e-08	3.67436e-06	7.60837
526	ATP6V1B2	-0.475593	7.50002	-6.71127	9.65772e-08	3.70054e-06	7.59782
9786	KIAA0586	-0.694019	5.05898	-6.68805	1.03477e-07	3.951e-06	7.52936
10891	PPARGC1A	-1.08981	4.31069	-6.68641	1.03981e-07	3.95639e-06	7.52453
440498	HSBP1L1	-1.20247	3.70692	-6.67796	1.06628e-07	4.04294e-06	7.4996
84168	ANTXR1	0.722441	7.20004	6.67155	1.0868e-07	4.10643e-06	7.48069
90362	FAM110B	1.16226	3.85028	6.66982	1.09243e-07	4.11342e-06	7.47556
55165	CEP55	-0.612	6.23678	-6.65607	1.13802e-07	4.2703e-06	7.435
1996	ELAVL4	0.87284	9.22877	6.63472	1.21268e-07	4.53485e-06	7.37196
85315	PAQR8	-1.19365	4.59304	-6.6317	1.22363e-07	4.56012e-06	7.36304
112885	PHF21B	1.55065	5.01496	6.6248	1.24904e-07	4.63892e-06	7.34266
56970	ATXN7L3	0.517034	6.54888	6.61169	1.29876e-07	4.80718e-06	7.30394
2131	EXT1	0.971344	5.19382	6.60195	1.33701e-07	4.93198e-06	7.27515
9747	TCAF1	0.547096	7.35768	6.59581	1.36168e-07	5.00603e-06	7.25701
2521	FUS	0.675889	9.14442	6.594	1.36906e-07	5.01619e-06	7.25165
6387	CXCL12	1.59416	4.31279	6.58494	1.40652e-07	5.13615e-06	7.22488
6059	ABCE1	-0.481	6.96386	-6.57602	1.44444e-07	5.25697e-06	7.1985
2971	GTF3A	-0.536679	6.76994	-6.56268	1.50304e-07	5.45203e-06	7.15905
4628	MYH10	0.645945	7.60488	6.55185	1.55238e-07	5.61228e-06	7.12702
7837	PXDN	0.917808	5.87493	6.54959	1.56288e-07	5.63155e-06	7.12033
64919	BCL11B	1.08782	5.80405	6.54758	1.57227e-07	5.64668e-06	7.1144
23464	GCAT	-1.5935	2.94916	-6.53093	1.65235e-07	5.91476e-06	7.06513
2752	GLUL	0.575281	7.02525	6.50999	1.75893e-07	6.27564e-06	7.00315
3236	HOXD10	1.01404	4.54829	6.48174	1.91378e-07	6.80578e-06	6.91949
25925	ZNF521	2.81699	2.64053	6.47736	1.93897e-07	6.87293e-06	6.90652
57801	HES4	3.27149	1.88699	6.47517	1.95169e-07	6.89556e-06	6.90004
80031	SEMA6D	1.5328	3.95466	6.46445	2.01522e-07	7.09696e-06	6.86829
642852	LOC642852	0.612825	5.18616	6.45733	2.05861e-07	7.22638e-06	6.84717
66000	TMEM108	0.939334	5.79075	6.42969	2.23591e-07	7.82353e-06	6.76527
196	AHR	2.05598	2.28599	6.42578	2.26221e-07	7.89018e-06	6.75368
3047	HBG1	4.45167	-1.71496	6.42225	2.28628e-07	7.94864e-06	6.74319
5101	PCDH9	1.12365	4.00716	6.41721	2.32096e-07	8.03029e-06	6.72826
23768	FLRT2	1.96594	3.03273	6.4167	2.32452e-07	8.03029e-06	6.72674
51203	NUSAP1	-0.551797	7.84935	-6.41271	2.35243e-07	8.10101e-06	6.71491
6591	SNAI2	1.98303	2.69728	6.4074	2.3901e-07	8.20476e-06	6.69917
1052	CEBPD	1.48753	3.98152	6.40071	2.43842e-07	8.33031e-06	6.67933
51454	GULP1	0.525019	6.20369	6.40022	2.44199e-07	8.33031e-06	6.67788
2120	ETV6	0.693638	5.46565	6.39626	2.47113e-07	8.40337e-06	6.66612
90417	KNSTRN	-0.58909	6.17658	-6.39298	2.49552e-07	8.45989e-06	6.65639
10302	SNAPC5	-0.695041	4.8282	-6.38719	2.53914e-07	8.56044e-06	6.63921
55714	TENM3	1.21009	4.62903	6.38689	2.54137e-07	8.56044e-06	6.63834
22978	NT5C2	0.66495	4.96938	6.38592	2.54878e-07	8.56044e-06	6.63546
5455	POU3F3	-1.15748	-0.00149755	-6.38384	2.56474e-07	8.58752e-06	6.62927
10643	IGF2BP3	-0.600851	6.82333	-6.38265	2.57385e-07	8.59161e-06	6.62576
1468	SLC25A10	-0.930884	3.78237	-6.36486	2.71465e-07	9.0273e-06	6.57297
54438	GFOD1	1.11484	3.60462	6.36409	2.72097e-07	9.0273e-06	6.57067
3667	IRS1	1.21611	3.16811	6.36037	2.75138e-07	9.10047e-06	6.55965
6774	STAT3	0.732564	5.74915	6.35815	2.76978e-07	9.13356e-06	6.55305
79646	PANK3	-0.724901	5.19576	-6.35539	2.79275e-07	9.18149e-06	6.54486
10500	SEMA6C	1.43595	2.97711	6.3436	2.89317e-07	9.46626e-06	6.50986
84923	FAM104A	-0.822234	3.87927	-6.34318	2.89677e-07	9.46626e-06	6.50863
4094	MAF	3.48898	-0.0772609	6.32543	3.05506e-07	9.95363e-06	6.45591
79966	SCD5	0.943701	4.81815	6.29638	3.33298e-07	1.08267e-05	6.36964
22998	LIMCH1	0.524203	7.19857	6.29253	3.37167e-07	1.09198e-05	6.35821
8237	USP11	0.495217	7.36923	6.28941	3.4034e-07	1.09899e-05	6.34893
51209	RAB9B	1.762	2.61874	6.28173	3.4827e-07	1.12052e-05	6.32611
5457	POU4F1	2.34195	1.98401	6.28096	3.49067e-07	1.12052e-05	6.32385
9586	CREB5	1.67712	3.43368	6.27818	3.51998e-07	1.1266e-05	6.31556
133584	EGFLAM	2.08247	3.02927	6.27286	3.57653e-07	1.14134e-05	6.29977
5325	PLAGL1	1.33326	3.15983	6.25905	3.72787e-07	1.18616e-05	6.25872
440957	SMIM4	-0.851392	5.67604	-6.22736	4.09972e-07	1.30068e-05	6.16454
1508	CTSB	0.649044	6.57348	6.22541	4.12386e-07	1.30453e-05	6.15873
54681	P4HTM	-1.02929	4.44559	-6.22437	4.13668e-07	1.30479e-05	6.15565
1141	CHRNB2	0.911346	5.06077	6.22139	4.17394e-07	1.30905e-05	6.14677
5079	PAX5	1.45701	4.60293	6.2209	4.18005e-07	1.30905e-05	6.14532
79974	CPED1	4.25814	-0.963886	6.21992	4.19238e-07	1.30905e-05	6.1424
1036	CDO1	3.70726	1.62681	6.21945	4.19829e-07	1.30905e-05	6.14101
10100	TSPAN2	2.74791	1.96787	6.21025	4.31586e-07	1.34186e-05	6.11366
65998	C11orf95	1.0039	4.94882	6.18331	4.67957e-07	1.4508e-05	6.03353
150223	YDJC	-0.691812	5.19339	-6.17434	4.80747e-07	1.48622e-05	6.00683
23741	EID1	0.458206	9.37606	6.15241	5.13486e-07	1.58293e-05	5.9416
655	BMP7	-0.820887	5.24947	-6.14704	5.21845e-07	1.60036e-05	5.92561
157285	SGK223	1.44624	3.76325	6.14689	5.22079e-07	1.60036e-05	5.92517
150737	TTC30B	1.04449	3.85477	6.14547	5.24304e-07	1.60266e-05	5.92096
9136	RRP9	-0.719769	5.27622	-6.13901	5.34594e-07	1.62954e-05	5.90172
55224	ETNK2	1.25905	3.19989	6.13471	5.41545e-07	1.64612e-05	5.88893
619279	ZNF704	-0.997302	5.33261	-6.1302	5.48938e-07	1.66394e-05	5.8755
653820	FAM72B	-0.928932	5.98389	-6.12608	5.55783e-07	1.68001e-05	5.86323
7262	PHLDA2	2.48088	2.19549	6.11825	5.69012e-07	1.71523e-05	5.83995
11001	SLC27A2	1.65065	2.44125	6.10951	5.84179e-07	1.75609e-05	5.81391
151556	GPR155	-0.792415	4.53651	-6.10797	5.86887e-07	1.75738e-05	5.80933
4091	SMAD6	1.21409	4.86073	6.10743	5.8784e-07	1.75738e-05	5.80772
58499	ZNF462	0.675781	6.87483	6.10388	5.94137e-07	1.77134e-05	5.79718
80303	EFHD1	1.72297	2.40334	6.09423	6.11634e-07	1.81853e-05	5.76845
4211	MEIS1	0.713625	6.1592	6.09001	6.19464e-07	1.83679e-05	5.75586
23089	PEG10	0.678418	7.53643	6.0789	6.40503e-07	1.89401e-05	5.7228
80757	TMEM121	1.25818	2.90968	6.0706	6.56698e-07	1.93664e-05	5.69809
55872	PBK	-0.708029	6.30533	-6.06528	6.6729e-07	1.96256e-05	5.68225
2674	GFRA1	2.27909	4.3116	6.06108	6.7579e-07	1.9822e-05	5.66972
51629	SLC25A39	-0.515332	8.06152	-6.05798	6.82117e-07	1.99538e-05	5.6605
10396	ATP8A1	-0.986001	5.34146	-6.05508	6.8809e-07	2.0023e-05	5.65187
2037	EPB41L2	0.524102	6.62499	6.05505	6.88164e-07	2.0023e-05	5.65177
55526	DHTKD1	-0.597794	6.09683	-6.05197	6.94569e-07	2.01555e-05	5.6426
8842	PROM1	1.36573	3.02744	6.04555	7.08129e-07	2.04943e-05	5.62347
119559	SFXN4	-0.52397	6.30955	-6.03719	7.2617e-07	2.09607e-05	5.59857
8120	AP3B2	1.68757	4.27111	6.03327	7.34786e-07	2.11533e-05	5.5869
2030	SLC29A1	-0.620381	6.07675	-6.02286	7.58166e-07	2.17688e-05	5.55591
23329	TBC1D30	2.49996	2.10142	5.99965	8.13062e-07	2.32835e-05	5.48675
9839	ZEB2	0.882093	5.02113	5.99578	8.22576e-07	2.34941e-05	5.47524
115827	RAB3C	-0.686731	4.56294	-5.98643	8.46086e-07	2.41024e-05	5.44736
10927	SPIN1	0.578715	7.14207	5.9829	8.55121e-07	2.42962e-05	5.43685
90427	BMF	1.2248	2.99556	5.9811	8.59772e-07	2.43647e-05	5.43149
10206	TRIM13	0.52878	6.44497	5.97866	8.66101e-07	2.44609e-05	5.42423
55197	RPRD1A	-0.436284	6.21799	-5.97807	8.67662e-07	2.44609e-05	5.42245
201780	SLC10A4	-1.12209	4.94937	-5.97527	8.74993e-07	2.46038e-05	5.41413
3161	HMMR	-0.763229	5.97988	-5.96843	8.93226e-07	2.50395e-05	5.39373
3068	HDGF	-0.305607	10.4182	-5.96773	8.95088e-07	2.50395e-05	5.39167
3887	KRT81	2.2451	-0.595924	5.96045	9.14958e-07	2.55297e-05	5.36995
148252	DIRAS1	1.13279	3.54966	5.94381	9.61982e-07	2.67265e-05	5.32038
55081	IFT57	0.551904	6.44709	5.94354	9.62765e-07	2.67265e-05	5.31958
8829	NRP1	1.05683	4.37934	5.94137	9.6909e-07	2.67733e-05	5.3131
8604	SLC25A12	0.760689	3.98337	5.94127	9.69369e-07	2.67733e-05	5.31282
4528	MTIF2	-0.658918	6.24155	-5.92644	1.01367e-06	2.79261e-05	5.26862
27338	UBE2S	-0.551934	7.70767	-5.92367	1.02216e-06	2.80458e-05	5.26037
6457	SH3GL3	2.51752	2.50658	5.92335	1.02317e-06	2.80458e-05	5.25939
1265	CNN2	0.913267	4.99424	5.92203	1.02725e-06	2.80869e-05	5.25546
8128	ST8SIA2	1.06989	4.50999	5.91987	1.03397e-06	2.81996e-05	5.24902
149076	ZNF362	0.460148	6.20625	5.91721	1.04228e-06	2.83552e-05	5.2411
83729	INHBE	-4.0218	4.54817	-5.91165	1.05987e-06	2.87619e-05	5.22455
29944	PNMA3	1.3647	3.96187	5.90891	1.06868e-06	2.89289e-05	5.21636
79925	SPEF2	1.38795	3.00615	5.87501	1.18367e-06	3.19348e-05	5.11532
27306	HPGDS	-4.67941	0.329244	-5.87389	1.18766e-06	3.19348e-05	5.11199
7090	TLE3	0.872508	6.1522	5.87357	1.1888e-06	3.19348e-05	5.11105
8405	SPOP	0.502756	8.31552	5.87259	1.19233e-06	3.19348e-05	5.10812
4811	NID1	1.54235	3.31017	5.87202	1.1944e-06	3.19348e-05	5.1064
23767	FLRT3	0.935879	4.5729	5.87084	1.19866e-06	3.19701e-05	5.10288
90780	PYGO2	0.438367	7.06648	5.86847	1.20725e-06	3.21206e-05	5.09582
54898	ELOVL2	3.55619	2.58157	5.85044	1.27471e-06	3.38326e-05	5.04207
10381	TUBB3	-0.567041	9.13986	-5.84687	1.2885e-06	3.41156e-05	5.03143
158038	LINGO2	-0.860969	5.17404	-5.84238	1.30606e-06	3.44965e-05	5.01805
84460	ZMAT1	2.12945	3.6312	5.83134	1.35025e-06	3.55773e-05	4.98516
7818	DAP3	-0.357261	7.80201	-5.82784	1.36462e-06	3.5869e-05	4.97471
116113	FOXP4	0.947603	3.97023	5.82632	1.37085e-06	3.58725e-05	4.9702
4088	SMAD3	1.00171	5.23053	5.82621	1.37134e-06	3.58725e-05	4.96985
2556	GABRA3	4.15152	2.16509	5.82054	1.39496e-06	3.63628e-05	4.95297
55701	ARHGEF40	1.12124	4.53371	5.82011	1.39677e-06	3.63628e-05	4.95169
10157	AASS	3.77787	1.0273	5.81265	1.42858e-06	3.71021e-05	4.92944
3614	IMPDH1	-0.701465	4.95618	-5.80684	1.45383e-06	3.76681e-05	4.91212
6443	SGCB	0.550762	6.09008	5.80306	1.47051e-06	3.79279e-05	4.90085
11177	BAZ1A	-0.495916	8.28858	-5.80299	1.47083e-06	3.79279e-05	4.90063
101927740	LOC101927740	1.33302	2.58852	5.80126	1.47849e-06	3.80353e-05	4.8955
2982	GUCY1A3	-0.674734	5.674	-5.79869	1.49002e-06	3.81904e-05	4.88782
9242	MSC	-1.32086	3.08247	-5.79835	1.49154e-06	3.81904e-05	4.88682
83543	AIF1L	1.29011	3.54107	5.79211	1.51991e-06	3.88254e-05	4.8682
22808	MRAS	0.979586	4.74256	5.7846	1.55471e-06	3.96215e-05	4.84583
10949	HNRNPA0	0.44425	8.84236	5.78042	1.57447e-06	4.00313e-05	4.83335
340719	NANOS1	-0.757986	4.9235	-5.77223	1.61386e-06	4.0849e-05	4.80893
983	CDK1	-0.491748	6.84863	-5.77217	1.61414e-06	4.0849e-05	4.80876
79810	PTCD2	-0.932979	3.4796	-5.76418	1.65353e-06	4.17489e-05	4.78494
11030	RBPMS	0.67878	5.51363	5.76294	1.65973e-06	4.18083e-05	4.78125
5796	PTPRK	0.863424	4.31554	5.75126	1.71928e-06	4.31437e-05	4.74642
114876	OSBPL1A	-0.593887	5.87228	-5.75099	1.72067e-06	4.31437e-05	4.74562
23625	FAM89B	0.740608	5.87778	5.74823	1.73507e-06	4.34047e-05	4.73739
7764	ZNF217	-0.616857	5.28505	-5.73826	1.78805e-06	4.46274e-05	4.70768
26032	SUSD5	1.66015	3.22829	5.73492	1.80617e-06	4.49766e-05	4.69772
26118	WSB1	0.526237	6.42144	5.73115	1.82682e-06	4.53869e-05	4.68649
221061	FAM171A1	0.470062	6.97229	5.72881	1.83978e-06	4.56047e-05	4.67951
54796	BNC2	1.14037	4.34184	5.72264	1.87432e-06	4.63553e-05	4.66114
5118	PCOLCE	0.842305	6.59375	5.71897	1.89519e-06	4.67652e-05	4.6502
376267	RAB15	1.26925	3.78656	5.71619	1.9112e-06	4.70536e-05	4.64189
10395	DLC1	0.602856	6.91763	5.71502	1.91796e-06	4.71133e-05	4.63841
8503	PIK3R3	0.755343	7.25026	5.71363	1.92601e-06	4.72047e-05	4.63427
8682	PEA15	0.605206	6.9692	5.69617	2.03025e-06	4.96475e-05	4.58222
85300	ATCAY	1.37147	4.13761	5.68568	2.09553e-06	5.11291e-05	4.55096
10186	LHFP	1.07661	2.92771	5.68447	2.10321e-06	5.12016e-05	4.54735
56033	BARX1	2.68167	1.31831	5.68294	2.1129e-06	5.13228e-05	4.54281
71	ACTG1	0.576576	11.6299	5.67744	2.14829e-06	5.20661e-05	4.52641
55738	ARFGAP1	0.623673	5.13311	5.67216	2.18282e-06	5.2703e-05	4.51067
148398	SAMD11	1.99314	2.98061	5.67194	2.18425e-06	5.2703e-05	4.51002
9379	NRXN2	1.38309	3.63544	5.67049	2.19388e-06	5.28181e-05	4.50568
79627	OGFRL1	-1.47976	3.77025	-5.65625	2.29024e-06	5.50162e-05	4.46324
84937	ZNRF1	0.752259	4.99923	5.6554	2.29606e-06	5.50347e-05	4.46073
5802	PTPRS	0.415424	6.38545	5.65401	2.30572e-06	5.51446e-05	4.45659
54458	PRR13	-0.724679	5.10413	-5.65211	2.319e-06	5.53408e-05	4.45092
101927279	EP300-AS1	-1.24558	2.78332	-5.64936	2.33831e-06	5.55238e-05	4.44273
9435	CHST2	1.62367	3.5028	5.64892	2.34141e-06	5.55238e-05	4.44143
64857	PLEKHG2	1.16933	4.47008	5.64836	2.34543e-06	5.55238e-05	4.43973
7443	VRK1	-0.457794	6.31602	-5.64812	2.34708e-06	5.55238e-05	4.43904
5527	PPP2R5C	-0.447101	6.91902	-5.64266	2.38613e-06	5.63251e-05	4.42275
5066	PAM	0.909993	5.0081	5.64061	2.40089e-06	5.65508e-05	4.41666
317762	CCDC85C	-0.696139	5.19705	-5.63687	2.4282e-06	5.70706e-05	4.4055
754	PTTG1IP	0.354636	7.75886	5.63498	2.44207e-06	5.72729e-05	4.39987
284069	FAM171A2	0.701227	5.73287	5.63112	2.47067e-06	5.77932e-05	4.38838
94241	TP53INP1	1.20853	4.20939	5.63056	2.47488e-06	5.77932e-05	4.3867
2894	GRID1	-1.2793	2.91093	-5.62972	2.48114e-06	5.78153e-05	4.38421
5880	RAC2	-1.55016	2.58181	-5.62281	2.53347e-06	5.89085e-05	4.36361
3359	HTR3A	-2.34736	1.59382	-5.61774	2.57257e-06	5.96902e-05	4.34849
55509	BATF3	1.10347	3.55506	5.61692	2.57891e-06	5.97101e-05	4.34606
55958	KLHL9	0.542209	6.22327	5.61329	2.60734e-06	6.024e-05	4.33524
490	ATP2B1	0.569189	6.8908	5.61222	2.61579e-06	6.03072e-05	4.33205
554282	FAM72C	-0.874115	6.20324	-5.60881	2.64283e-06	6.08018e-05	4.3219
1832	DSP	5.97353	0.12081	5.60451	2.67734e-06	6.14658e-05	4.3091
24148	PRPF6	0.380604	8.29142	5.59684	2.74005e-06	6.27731e-05	4.28625
3566	IL4R	2.02332	2.34578	5.58728	2.82034e-06	6.44768e-05	4.25775
4522	MTHFD1	-0.372905	7.28104	-5.5837	2.85095e-06	6.4927e-05	4.2471
9244	CRLF1	2.82617	0.908804	5.58358	2.85197e-06	6.4927e-05	4.24674
5602	MAPK10	1.07427	4.64757	5.58223	2.86365e-06	6.50569e-05	4.24271
55787	TXLNG	-0.524887	6.52494	-5.57933	2.88878e-06	6.5491e-05	4.23409
10123	ARL4C	1.12513	4.41387	5.57604	2.91765e-06	6.5928e-05	4.22428
5152	PDE9A	0.977873	3.98662	5.57575	2.92017e-06	6.5928e-05	4.22343
204	AK2	-0.370074	8.43257	-5.57432	2.93282e-06	6.60766e-05	4.21916
27341	RRP7A	-0.760014	5.16656	-5.57183	2.95501e-06	6.64389e-05	4.21172
6096	RORB	1.88275	3.01168	5.56418	3.02404e-06	6.78507e-05	4.18894
134957	STXBP5	1.30374	4.02619	5.55752	3.08546e-06	6.90863e-05	4.1691
21	ABCA3	-0.642457	5.20066	-5.55412	3.11726e-06	6.96551e-05	4.15899
607	BCL9	0.602739	6.7032	5.55257	3.1319e-06	6.98387e-05	4.15437
4199	ME1	-0.950329	3.75363	-5.54154	3.23788e-06	7.20056e-05	4.12154
51761	ATP8A2	1.62065	2.54046	5.54109	3.2423e-06	7.20056e-05	4.12019
7373	COL14A1	1.95029	2.51698	5.54005	3.25251e-06	7.20851e-05	4.11709
114884	OSBPL10	1.55175	2.3817	5.53833	3.26945e-06	7.23133e-05	4.11197
1602	DACH1	0.404193	7.41237	5.5296	3.35677e-06	7.40941e-05	4.08597
26973	CHORDC1	-0.614194	6.16179	-5.52889	3.364e-06	7.41034e-05	4.08385
80144	FRAS1	-1.23991	3.15456	-5.52612	3.39221e-06	7.45738e-05	4.07561
349136	WDR86	1.36956	2.04977	5.51953	3.46042e-06	7.59199e-05	4.05598
8496	PPFIBP1	0.752178	6.34271	5.51458	3.51244e-06	7.68152e-05	4.04126
84886	C1orf198	0.483307	5.40719	5.51431	3.51534e-06	7.68152e-05	4.04044
7088	TLE1	0.693196	4.7858	5.51077	3.55314e-06	7.73929e-05	4.0299
374882	TMEM205	-0.614738	6.45785	-5.5104	3.55707e-06	7.73929e-05	4.02881
55103	RALGPS2	1.38925	3.89826	5.50984	3.56312e-06	7.73929e-05	4.02713
6857	SYT1	-0.732584	8.22074	-5.50352	3.63174e-06	7.87263e-05	4.00832
10468	FST	3.01046	1.36955	5.50245	3.64351e-06	7.88243e-05	4.00513
6664	SOX11	0.540467	9.29103	5.49334	3.74506e-06	8.06922e-05	3.97802
6498	SKIL	0.879153	5.76164	5.49276	3.75165e-06	8.06922e-05	3.97629
64318	NOC3L	-0.496854	6.32384	-5.49272	3.75209e-06	8.06922e-05	3.97617
699	BUB1	-0.621974	5.78676	-5.48784	3.80771e-06	8.17269e-05	3.96166
8908	GYG2	0.901918	4.60643	5.48468	3.84429e-06	8.23495e-05	3.95224
221981	THSD7A	1.14763	4.61971	5.48129	3.88378e-06	8.28792e-05	3.94216
152007	GLIPR2	0.699192	4.84413	5.48125	3.88425e-06	8.28792e-05	3.94204
117	ADCYAP1R1	2.0341	2.16041	5.47978	3.90158e-06	8.30861e-05	3.93765
3659	IRF1	0.974261	5.39517	5.47822	3.92001e-06	8.33156e-05	3.933
79660	PPP1R3B	-1.2268	3.80563	-5.47671	3.93791e-06	8.35327e-05	3.92851
91663	MYADM	0.59764	5.95077	5.47576	3.94922e-06	8.36097e-05	3.92569
57526	PCDH19	2.60232	2.26314	5.47332	3.97838e-06	8.40636e-05	3.91843
57149	LYRM1	-0.749734	4.12267	-5.46841	4.03771e-06	8.51518e-05	3.90384
3597	IL13RA1	1.13434	3.17769	5.46602	4.06696e-06	8.56028e-05	3.89672
83988	NCALD	0.816824	5.16243	5.45941	4.1489e-06	8.7159e-05	3.87706
118881	COMTD1	-1.04392	3.56043	-5.45748	4.17317e-06	8.74998e-05	3.87131
55959	SULF2	-0.675111	6.15678	-5.44907	4.28055e-06	8.95786e-05	3.84627
1747	DLX3	2.63923	1.65663	5.4483	4.29039e-06	8.96124e-05	3.844
80817	CEP44	-0.500024	7.98036	-5.44525	4.33011e-06	9.02686e-05	3.83492
9749	PHACTR2	0.76577	5.25445	5.43367	4.48415e-06	9.33013e-05	3.80046
54751	FBLIM1	1.07882	3.75247	5.42566	4.59389e-06	9.53447e-05	3.77663
891	CCNB1	-0.484659	7.11853	-5.42523	4.59989e-06	9.53447e-05	3.77535
970	CD70	4.24742	-0.195417	5.42194	4.64567e-06	9.59485e-05	3.76559
6939	TCF15	1.24151	3.11023	5.42187	4.64665e-06	9.59485e-05	3.76538
57486	NLN	-0.521981	6.16319	-5.41932	4.68259e-06	9.65074e-05	3.75779
84667	HES7	-1.37377	2.77679	-5.41719	4.71285e-06	9.69475e-05	3.75144
23233	EXOC6B	0.661434	4.65899	5.41639	4.72417e-06	9.69966e-05	3.74908
3222	HOXC5	-1.14685	2.59038	-5.41577	4.73306e-06	9.69966e-05	3.74722
2702	GJA5	2.64546	-0.187436	5.4108	4.80461e-06	9.82777e-05	3.73244
503639	DUXAP10	0.528989	6.28866	5.40727	4.85605e-06	9.91437e-05	3.72194
84532	ACSS1	1.38067	3.06352	5.40322	4.91575e-06	0.000100174	3.7099
9021	SOCS3	1.57236	3.89524	5.39988	4.9655e-06	0.000100999	3.69998
6647	SOD1	-0.388541	8.69697	-5.39822	4.99048e-06	0.000101318	3.69504
5573	PRKAR1A	0.340344	8.39967	5.39449	5.04698e-06	0.000102234	3.68394
92312	MEX3A	0.496196	9.69309	5.394	5.0544e-06	0.000102234	3.6825
10058	ABCB6	-0.633449	5.93153	-5.38509	5.19213e-06	0.000104825	3.65601
57211	ADGRG6	2.12806	1.92678	5.37793	5.30558e-06	0.000106917	3.63471
1032	CDKN2D	-0.876566	4.57538	-5.37162	5.40751e-06	0.00010877	3.61597
51096	UTP18	-0.380924	6.19985	-5.36375	5.53746e-06	0.000111178	3.59258
116238	TLCD1	-1.41612	2.73584	-5.36281	5.55319e-06	0.000111289	3.58978
167227	DCP2	-0.611377	5.21473	-5.35189	5.73914e-06	0.000114804	3.55734
4675	NAP1L3	1.28806	2.87227	5.3433	5.88991e-06	0.000117604	3.5318
4237	MFAP2	1.53125	2.35516	5.33388	6.05954e-06	0.000120769	3.50384
57549	IGSF9	1.08893	6.08619	5.3305	6.12175e-06	0.000121746	3.49378
1746	DLX2	3.90583	0.417323	5.33	6.13093e-06	0.000121746	3.49231
51016	EMC9	-0.872548	4.21273	-5.32824	6.16358e-06	0.000122146	3.48708
389	RHOC	0.514315	5.51015	5.32743	6.17874e-06	0.000122146	3.48466
9678	PHF14	0.392098	8.48968	5.32671	6.1921e-06	0.000122146	3.48253
9212	AURKB	-0.557539	7.24318	-5.3265	6.19598e-06	0.000122146	3.48191
201164	PLD6	-0.95499	4.92727	-5.32319	6.25824e-06	0.000123009	3.47207
84848	MIR503HG	1.53454	3.18361	5.32297	6.26233e-06	0.000123009	3.47142
1281	COL3A1	2.17166	3.22749	5.31458	6.42291e-06	0.000125935	3.44649
2355	FOSL2	-0.977629	4.64321	-5.3124	6.4652e-06	0.000126537	3.44003
1200	TPP1	-0.818428	4.43316	-5.29655	6.78167e-06	0.000132492	3.39298
10280	SIGMAR1	-0.482662	8.02306	-5.29169	6.88184e-06	0.000134208	3.37855
57523	NYNRIN	1.21886	3.13823	5.29025	6.91185e-06	0.000134552	3.37427
79694	MANEA	-0.904962	3.34264	-5.28815	6.95578e-06	0.000135166	3.36803
254268	AKNAD1	-2.29491	2.59516	-5.28732	6.97315e-06	0.000135247	3.36557
89832	CHRFAM7A	-1.39574	2.15999	-5.28677	6.9848e-06	0.000135247	3.36393
392617	ELFN1	2.80514	1.16886	5.28129	7.10108e-06	0.000137254	3.34768
79823	CAMKMT	-0.627978	4.08411	-5.27914	7.14716e-06	0.000137726	3.34131
5584	PRKCI	-0.711259	5.64667	-5.27897	7.15083e-06	0.000137726	3.34081
1107	CHD3	0.750923	7.48759	5.27706	7.19228e-06	0.00013828	3.33512
388931	MFSD2B	-0.854226	5.49783	-5.26211	7.5239e-06	0.000144401	3.29075
51241	COX16	-0.925838	4.96547	-5.25798	7.61807e-06	0.00014595	3.27851
8648	NCOA1	0.775337	4.87822	5.25373	7.71625e-06	0.000147572	3.26591
54826	GIN1	-0.723985	3.07623	-5.25199	7.75681e-06	0.000148087	3.26075
152485	ZNF827	0.595995	6.06174	5.24763	7.85945e-06	0.000149784	3.24782
83857	TMTC1	1.29856	2.28136	5.24604	7.89717e-06	0.00015013	3.24311
1903	S1PR3	2.17663	2.44782	5.24513	7.91881e-06	0.00015013	3.24041
54765	TRIM44	0.437564	6.98503	5.24468	7.92969e-06	0.00015013	3.23906
9865	TRIL	1.37645	3.21794	5.24455	7.93278e-06	0.00015013	3.23868
5860	QDPR	-0.498059	7.39123	-5.23711	8.11264e-06	0.000153267	3.21662
9547	CXCL14	2.74306	1.13352	5.23648	8.1282e-06	0.000153295	3.21473
340526	RGAG4	1.12504	4.70152	5.23357	8.19968e-06	0.000154364	3.20612
9985	REC8	0.701704	6.40153	5.23302	8.21328e-06	0.000154364	3.20449
56852	RAD18	-0.604588	4.72814	-5.22972	8.29544e-06	0.00015564	3.1947
3720	JARID2	0.472546	7.57972	5.2291	8.31094e-06	0.000155662	3.19286
9149	DYRK1B	0.839264	3.77125	5.22436	8.43033e-06	0.000157627	3.17883
94005	PIGS	-0.477092	6.52013	-5.22018	8.53719e-06	0.000159351	3.16644
10970	CKAP4	0.508913	8.35765	5.21885	8.57171e-06	0.000159721	3.16247
55696	RBM22	0.445301	6.70199	5.21798	8.5941e-06	0.000159865	3.1599
220	ALDH1A3	1.01543	3.16284	5.21614	8.64176e-06	0.000160477	3.15446
6046	BRD2	0.476331	6.8925	5.2104	8.79274e-06	0.000163003	3.13742
23263	MCF2L	1.07257	3.71188	5.20336	8.98101e-06	0.00016621	3.11658
2013	EMP2	0.74574	5.63809	5.20214	9.01418e-06	0.00016654	3.11296
1382	CRABP2	1.28133	7.93578	5.19343	9.25381e-06	0.000170678	3.08715
55346	TCP11L1	-0.868364	4.04485	-5.19241	9.28219e-06	0.000170912	3.08414
4054	LTBP3	0.672933	3.97957	5.18689	9.43794e-06	0.000173269	3.06777
4192	MDK	0.716029	8.49866	5.18675	9.44205e-06	0.000173269	3.06735
9197	SLC33A1	-0.516242	4.23342	-5.18583	9.46815e-06	0.000173455	3.06463
2934	GSN	1.34438	2.37741	5.18167	9.58753e-06	0.000175347	3.05231
51177	PLEKHO1	0.629899	8.51621	5.17643	9.74015e-06	0.000177839	3.03678
440465	BAIAP2-AS1	0.910439	4.34451	5.17409	9.80895e-06	0.000178796	3.02986
2149	F2R	0.93443	4.45411	5.17219	9.86513e-06	0.000179519	3.02424
3895	KTN1	-0.384639	9.77562	-5.16876	9.96748e-06	0.000181079	3.01409
54926	UBE2R2	0.266173	8.49251	5.16457	1.00941e-05	0.000183073	3.00168
7425	VGF	1.66263	6.4933	5.15282	1.04578e-05	0.000189354	2.96688
90	ACVR1	1.10465	3.46771	5.15189	1.04869e-05	0.000189566	2.96414
51450	PRRX2	1.59148	1.70226	5.14979	1.05535e-05	0.000190452	2.95793
9055	PRC1	-0.824689	6.52627	-5.14825	1.06025e-05	0.000191021	2.95337
388394	RPRML	2.06347	3.02054	5.1368	1.09743e-05	0.00019691	2.91949
389421	LIN28B	-0.650099	5.85853	-5.13657	1.0982e-05	0.00019691	2.9188
2961	GTF2E2	-0.469727	6.30033	-5.13652	1.09837e-05	0.00019691	2.91865
10131	TRAP1	-0.508882	6.29712	-5.13435	1.10556e-05	0.000197873	2.91224
22837	COBLL1	-1.35055	2.75091	-5.13285	1.11056e-05	0.000198442	2.9078
118	ADD1	0.442114	6.45095	5.1315	1.11508e-05	0.000198923	2.9038
65244	SPATS2	0.336787	5.9326	5.13024	1.11932e-05	0.000199353	2.90007
4214	MAP3K1	0.670926	5.80875	5.12516	1.13657e-05	0.000202094	2.88504
56675	NRIP3	2.04416	2.08568	5.1196	1.15573e-05	0.000205166	2.86861
5287	PIK3C2B	0.832262	4.20451	5.11857	1.15932e-05	0.000205468	2.86557
8313	AXIN2	1.38559	1.96218	5.11424	1.17455e-05	0.000207829	2.85274
387763	C11orf96	-0.618908	5.56082	-5.11037	1.18829e-05	0.000209919	2.84131
728833	FAM72D	-1.38734	2.53156	-5.10784	1.19737e-05	0.00021118	2.83383
374659	HDDC3	-0.830722	4.22664	-5.10537	1.2063e-05	0.00021241	2.82653
84876	ORAI1	-0.899626	4.00761	-5.09839	1.2319e-05	0.000216568	2.80589
84869	CBR4	-0.615292	5.86884	-5.09774	1.23433e-05	0.000216645	2.80396
144165	PRICKLE1	0.7042	5.122	5.09526	1.24355e-05	0.000217912	2.79664
159296	NKX2-3	2.67763	0.922043	5.09266	1.25332e-05	0.000219141	2.78895
51564	HDAC7	0.685755	7.51956	5.09233	1.25459e-05	0.000219141	2.78796
54512	EXOSC4	-1.07607	3.35028	-5.08678	1.27568e-05	0.000222467	2.77158
79875	THSD4	1.7823	1.63792	5.08481	1.28328e-05	0.000223434	2.76575
2675	GFRA2	0.814545	5.617	5.08162	1.29567e-05	0.000225231	2.75631
55083	KIF26B	1.13236	2.98172	5.07145	1.3359e-05	0.000231524	2.72627
10160	FARP1	0.338898	6.73918	5.07092	1.33801e-05	0.000231524	2.72472
132160	PPM1M	-1.8177	3.07053	-5.07086	1.33826e-05	0.000231524	2.72454
8324	FZD7	1.29587	3.2833	5.0685	1.3478e-05	0.000232806	2.71755
1655	DDX5	0.632315	8.69362	5.06519	1.36128e-05	0.000234762	2.70778
64093	SMOC1	1.41198	3.13749	5.0646	1.36368e-05	0.000234803	2.70605
6616	SNAP25	0.864364	4.08191	5.06383	1.36686e-05	0.000234979	2.70376
4887	NPY2R	-3.00082	-0.388648	-5.0601	1.38225e-05	0.00023725	2.69277
5480	PPIC	1.04628	3.24342	5.05505	1.40341e-05	0.000240503	2.67784
3400	ID4	1.50324	2.57107	5.05449	1.40579e-05	0.000240532	2.67618
8519	IFITM1	2.90216	4.07667	5.05259	1.41383e-05	0.000241224	2.67058
23543	RBFOX2	0.34573	7.53309	5.05249	1.41427e-05	0.000241224	2.67027
5800	PTPRO	0.617313	4.89726	5.04607	1.44182e-05	0.000245538	2.65133
57556	SEMA6A	0.60217	6.31736	5.04486	1.44707e-05	0.000246047	2.64776
4613	MYCN	-0.593204	10.3838	-5.03321	1.49861e-05	0.000254413	2.61339
1627	DBN1	0.477506	7.48759	5.0283	1.5209e-05	0.000257794	2.5989
8607	RUVBL1	-0.287885	7.46072	-5.02582	1.53228e-05	0.000259046	2.59157
6546	SLC8A1	-1.43991	3.02072	-5.02566	1.53304e-05	0.000259046	2.59109
56963	RGMA	1.14726	4.354	5.01586	1.57885e-05	0.000266134	2.56218
347252	IGFBPL1	-0.432625	9.31683	-5.01564	1.57988e-05	0.000266134	2.56154
79065	ATG9A	-0.507796	5.19048	-5.01411	1.58717e-05	0.000266949	2.55702
3329	HSPD1	-0.422786	9.95768	-5.01113	1.60145e-05	0.000268934	2.54823
79971	WLS	0.532386	6.66686	5.00493	1.63151e-05	0.00027356	2.52997
63876	PKNOX2	2.03355	1.95673	4.99951	1.65829e-05	0.000277623	2.51399
9755	TBKBP1	0.873667	4.24244	4.99774	1.66714e-05	0.000278587	2.50877
80036	TRPM3	-0.993347	4.23801	-4.99734	1.66917e-05	0.000278587	2.50757
51324	SPG21	-0.379086	7.04895	-4.99681	1.6718e-05	0.0002786	2.50603
6860	SYT4	1.3678	5.59658	4.99504	1.68072e-05	0.000279277	2.50081
23705	CADM1	0.472538	7.87446	4.99463	1.68281e-05	0.000279277	2.49958
5110	PCMT1	-0.308233	7.24511	-4.9939	1.68646e-05	0.000279277	2.49746
9213	XPR1	-0.477616	6.23796	-4.99362	1.68788e-05	0.000279277	2.49663
6238	RRBP1	0.693267	5.97905	4.99346	1.6887e-05	0.000279277	2.49616
122509	IFI27L1	-0.875678	3.97532	-4.99228	1.6947e-05	0.000279447	2.49267
79870	BAALC	1.40514	2.76257	4.99225	1.69486e-05	0.000279447	2.49258
26153	KIF26A	0.569954	6.87288	4.98893	1.71185e-05	0.000281821	2.48279
3636	INPPL1	0.731083	6.27324	4.98729	1.72029e-05	0.000282767	2.47797
123	PLIN2	-0.836432	5.85208	-4.9868	1.7228e-05	0.000282767	2.47654
9144	SYNGR2	-0.545492	5.76966	-4.98245	1.7455e-05	0.000286061	2.46369
79939	SLC35E1	0.469239	5.67889	4.98044	1.75603e-05	0.000287356	2.45778
3099	HK2	-0.659083	6.42009	-4.97479	1.78608e-05	0.000291834	2.44113
255928	SYT14	1.31492	3.50548	4.97401	1.79024e-05	0.000292041	2.43885
132	ADK	-0.476905	6.04418	-4.97342	1.79345e-05	0.000292041	2.43709
1948	EFNB2	0.917898	3.801	4.97305	1.7954e-05	0.000292041	2.43603
10195	ALG3	-0.533183	6.69014	-4.96297	1.85057e-05	0.000300565	2.40633
9459	ARHGEF6	-0.93872	3.29289	-4.96013	1.86643e-05	0.000302689	2.39796
51308	REEP2	-0.924724	3.50815	-4.95803	1.87823e-05	0.00030415	2.39177
55315	SLC29A3	1.01769	2.48962	4.95752	1.88109e-05	0.00030416	2.39028
51339	DACT1	3.51642	1.03696	4.95689	1.88466e-05	0.000304286	2.38842
9631	NUP155	-0.456429	5.04838	-4.95421	1.8999e-05	0.000306291	2.38052
4832	NME3	-0.850385	3.75702	-4.94685	1.94229e-05	0.000312663	2.35887
159	ADSS	-0.486164	5.70092	-4.94609	1.9467e-05	0.000312909	2.35665
1869	E2F1	-0.483715	6.46496	-4.94236	1.96865e-05	0.000315971	2.34565
284	ANGPT1	2.45597	1.92346	4.94138	1.97444e-05	0.000316433	2.34277
54510	PCDH18	1.24863	3.48466	4.93802	1.99446e-05	0.000319171	2.33287
129293	TRABD2A	2.94076	1.97534	4.93681	2.00171e-05	0.000319862	2.32931
9253	NUMBL	-0.775122	5.12126	-4.93314	2.02381e-05	0.00032292	2.31854
100294720	NHEG1	-2.73484	0.885893	-4.93252	2.0276e-05	0.00032305	2.31671
1601	DAB2	3.39128	0.331064	4.92623	2.0662e-05	0.000328719	2.29821
4605	MYBL2	-0.476245	7.353	-4.92408	2.07961e-05	0.000330369	2.29187
5720	PSME1	-0.477344	7.48837	-4.92107	2.09843e-05	0.000332873	2.28303
2	A2M	4.08461	0.137394	4.917	2.12419e-05	0.000336469	2.27107
5768	QSOX1	0.627663	5.28033	4.91598	2.13067e-05	0.000337005	2.26808
9312	KCNB2	1.26422	3.72824	4.91444	2.14059e-05	0.000338082	2.26352
9891	NUAK1	0.857933	4.51003	4.91277	2.15131e-05	0.000339283	2.25862
8874	ARHGEF7	0.453134	5.65232	4.91021	2.16789e-05	0.000341403	2.2511
81619	TSPAN14	0.696395	4.85024	4.90943	2.17294e-05	0.000341703	2.24882
51106	TFB1M	-0.809057	4.95686	-4.90728	2.18699e-05	0.000343417	2.2425
25	ABL1	0.455487	6.22469	4.90666	2.19108e-05	0.000343564	2.24066
8019	BRD3	0.399903	8.26192	4.90586	2.19631e-05	0.000343888	2.23833
6567	SLC16A2	1.48362	3.19117	4.89846	2.2456e-05	0.000351101	2.21657
9208	LRRFIP1	-0.398849	7.20336	-4.89755	2.25171e-05	0.00035155	2.2139
7105	TSPAN6	0.353019	6.38001	4.89393	2.2763e-05	0.000354881	2.20325
1397	CRIP2	0.798821	4.96347	4.88788	2.31796e-05	0.000360859	2.18547
5159	PDGFRB	1.07187	3.88682	4.88483	2.33921e-05	0.000363418	2.17653
883	KYAT1	-1.11906	3.36711	-4.88456	2.34108e-05	0.000363418	2.17574
54741	LEPROT	0.441232	5.72453	4.8744	2.41342e-05	0.000374114	2.14591
143872	ARHGAP42	-0.760504	4.28847	-4.87297	2.42382e-05	0.000375193	2.1417
338707	B4GALNT4	0.691065	5.26355	4.86606	2.47447e-05	0.000382489	2.12143
23241	PACS2	0.565678	5.40397	4.86309	2.49661e-05	0.000385363	2.1127
118611	C10orf90	-1.59005	1.72565	-4.86137	2.50945e-05	0.000386797	2.10767
64101	LRRC4	1.70383	1.94918	4.8584	2.53191e-05	0.000389707	2.09894
9427	ECEL1	1.85086	1.95839	4.85652	2.5462e-05	0.000391353	2.09342
56937	PMEPA1	0.745662	4.98507	4.84997	2.59658e-05	0.000398532	2.07423
51253	MRPL37	-0.377191	7.3625	-4.84521	2.63387e-05	0.000403419	2.06025
9939	RBM8A	0.315286	10.0403	4.84496	2.63583e-05	0.000403419	2.05952
10857	PGRMC1	0.549659	6.80615	4.84255	2.65488e-05	0.000405765	2.05247
6136	RPL12	-0.688751	5.66493	-4.83979	2.67691e-05	0.000408557	2.04437
4281	MID1	0.67795	5.44998	4.83784	2.69264e-05	0.000410382	2.03863
7005	TEAD3	1.08798	3.46079	4.83668	2.702e-05	0.000411234	2.03523
51023	MRPS18C	-0.832782	4.06626	-4.82813	2.77195e-05	0.000421289	2.01019
51377	UCHL5	-0.387137	7.18739	-4.82728	2.77904e-05	0.000421778	2.00769
10437	IFI30	-0.966802	5.07159	-4.82602	2.78952e-05	0.000422779	2.004
5077	PAX3	2.52174	1.34111	4.82029	2.83778e-05	0.000429124	1.9872
5983	RFC3	-0.469794	6.54796	-4.82011	2.83927e-05	0.000429124	1.98669
482	ATP1B2	2.09195	1.5478	4.81838	2.85406e-05	0.000430761	1.9816
758	MPPED1	1.66354	0.107785	4.81764	2.86033e-05	0.000431109	1.97945
8728	ADAM19	0.886669	3.11406	4.81677	2.8678e-05	0.000431637	1.97689
6790	AURKA	-0.600125	7.26615	-4.81384	2.89303e-05	0.000434833	1.96832
2817	GPC1	0.656768	5.16367	4.81331	2.89763e-05	0.000434925	1.96676
1374	CPT1A	0.532165	6.80401	4.81232	2.90618e-05	0.000435607	1.96387
5481	PPID	-0.40582	6.72541	-4.8094	2.93175e-05	0.000438835	1.95529
56271	BEX4	0.438154	6.34121	4.80571	2.96428e-05	0.000443094	1.94449
51421	AMOTL2	1.1823	2.93694	4.80486	2.97181e-05	0.00044361	1.942
10079	ATP9A	0.639716	4.45233	4.80233	2.99431e-05	0.000446357	1.93462
27292	DIMT1	-0.388983	6.72629	-4.79508	3.05994e-05	0.000455517	1.91338
5324	PLAG1	2.60165	1.40138	4.79373	3.07233e-05	0.000456736	1.90943
5052	PRDX1	-0.313306	9.5762	-4.79097	3.09773e-05	0.000459884	1.90136
647979	NORAD	0.410401	7.6472	4.78698	3.1349e-05	0.000464769	1.88968
84620	ST6GAL2	1.43849	2.90464	4.78448	3.15849e-05	0.000467628	1.88235
10400	PEMT	-0.645817	3.91203	-4.78312	3.17135e-05	0.000468895	1.87837
154661	RUNDC3B	1.75563	2.44101	4.78169	3.1849e-05	0.000470258	1.87419
10591	DNPH1	-0.638153	6.87234	-4.78086	3.19283e-05	0.00047068	1.87176
157697	ERICH1	-0.586135	5.58321	-4.78048	3.1964e-05	0.00047068	1.87066
10383	TUBB4B	-0.665172	6.48337	-4.77826	3.21774e-05	0.000473181	1.86415
9447	AIM2	3.12239	-0.590081	4.77591	3.24032e-05	0.00047586	1.8573
4135	MAP6	-0.963694	3.4958	-4.77143	3.28404e-05	0.00048163	1.84418
7978	MTERF1	-0.937827	2.38019	-4.76823	3.31558e-05	0.000485601	1.83483
63939	FAM217B	0.594928	6.00878	4.76675	3.3303e-05	0.000486947	1.83049
10371	SEMA3A	1.19208	2.82069	4.7664	3.33372e-05	0.000486947	1.82949
1788	DNMT3A	0.377217	7.34747	4.76456	3.35211e-05	0.000488977	1.8241
10602	CDC42EP3	0.463722	7.81791	4.76324	3.36532e-05	0.000490247	1.82025
9221	NOLC1	-0.314463	8.33556	-4.76119	3.38597e-05	0.000492595	1.81426
22822	PHLDA1	0.699946	6.69391	4.75921	3.4061e-05	0.000494862	1.80846
9829	DNAJC6	-0.707135	4.27643	-4.75786	3.41982e-05	0.000496192	1.80453
55536	CDCA7L	-1.13577	3.43767	-4.75595	3.43944e-05	0.000498376	1.79893
26147	PHF19	-0.504312	6.67056	-4.75515	3.44767e-05	0.000498904	1.79659
23526	ARHGAP45	0.705861	3.80224	4.74911	3.51033e-05	0.000507296	1.77896
8543	LMO4	0.770452	8.59016	4.74694	3.53317e-05	0.00050992	1.77262
7159	TP53BP2	0.37483	6.2327	4.74628	3.54012e-05	0.000510247	1.77069
90525	SHF	-0.880434	3.86357	-4.74265	3.57874e-05	0.00051513	1.76008
4751	NEK2	-0.571856	6.05577	-4.74032	3.60364e-05	0.000517397	1.75329
50855	PARD6A	-0.909772	3.46603	-4.73985	3.60872e-05	0.000517397	1.75191
5783	PTPN13	0.998563	4.70894	4.73985	3.60875e-05	0.000517397	1.7519
4741	NEFM	0.585662	9.10144	4.73838	3.62466e-05	0.000518994	1.7476
51083	GAL	-0.767007	7.31559	-4.73752	3.63393e-05	0.000519638	1.7451
29767	TMOD2	0.714404	4.78868	4.73667	3.6432e-05	0.000520279	1.74261
7345	UCHL1	-0.315487	10.1641	-4.73459	3.66588e-05	0.000522833	1.73653
4915	NTRK2	2.99351	0.956773	4.73265	3.68712e-05	0.000525174	1.73088
7867	MAPKAPK3	0.878782	3.93913	4.73002	3.71621e-05	0.000528624	1.72319
10535	RNASEH2A	-0.367603	6.62213	-4.72888	3.72886e-05	0.000529732	1.71987
29028	ATAD2	-0.36697	7.36732	-4.72764	3.74263e-05	0.000530995	1.71626
6256	RXRA	0.510939	5.48626	4.72184	3.80794e-05	0.000539558	1.69934
84952	CGNL1	2.05659	2.28522	4.72078	3.82007e-05	0.000540572	1.69622
348926	FAM86EP	-0.913643	2.86736	-4.71908	3.83946e-05	0.000542611	1.69127
1528	CYB5A	-0.704769	5.60641	-4.71632	3.87114e-05	0.00054613	1.68323
10765	KDM5B	0.561475	8.04798	4.71539	3.88198e-05	0.00054613	1.6805
268	AMH	1.25044	2.98146	4.71536	3.88231e-05	0.00054613	1.68041
9232	PTTG1	-0.544021	8.23906	-4.71517	3.88444e-05	0.00054613	1.67988
23016	EXOSC7	-0.492144	5.56377	-4.71219	3.91911e-05	0.000550294	1.67119
3394	IRF8	1.28333	-1.93766	4.71132	3.92938e-05	0.000550758	1.66863
11245	GPR176	-0.907709	4.42539	-4.71062	3.93753e-05	0.000550758	1.6666
201931	TMEM192	-0.565601	5.03113	-4.71062	3.9376e-05	0.000550758	1.66658
3398	ID2	0.578787	8.07522	4.70973	3.94796e-05	0.000551497	1.66401
7283	TUBG1	-0.404918	7.73879	-4.70647	3.98652e-05	0.000556063	1.65451
387104	SOGA3	-0.890974	5.79936	-4.70594	3.9929e-05	0.000556063	1.65294
5371	PML	0.573128	4.87372	4.70568	3.99597e-05	0.000556063	1.65219
121274	ZNF641	0.923429	3.39632	4.70478	4.00669e-05	0.00055677	1.64957
50940	PDE11A	1.8077	1.4807	4.7044	4.01128e-05	0.00055677	1.64845
1163	CKS1B	-0.475224	9.16746	-4.69285	4.15169e-05	0.00057508	1.6148
25924	MYRIP	-1.49328	2.12606	-4.69269	4.15377e-05	0.00057508	1.61431
100128822	LINC01003	-0.996692	2.70759	-4.68759	4.21736e-05	0.000583142	1.59946
10728	PTGES3	-0.274164	9.25014	-4.68681	4.22719e-05	0.00058376	1.59718
84634	KISS1R	2.35983	0.716324	4.67765	4.34414e-05	0.00059915	1.5705
29899	GPSM2	-0.927735	3.21443	-4.67249	4.4114e-05	0.000607657	1.55547
6611	SMS	-0.340409	8.51737	-4.6715	4.42438e-05	0.000608674	1.5526
309	ANXA6	0.517309	6.1949	4.67102	4.43068e-05	0.000608772	1.55121
55207	ARL8B	-0.430268	5.61925	-4.66575	4.50087e-05	0.000617635	1.53585
54944	LINC01521	0.753816	3.91182	4.6632	4.53508e-05	0.000621546	1.52844
55907	CMAS	-0.472765	5.98679	-4.65849	4.59912e-05	0.00062953	1.51474
56985	ADPRM	-1.29393	2.16406	-4.65739	4.61419e-05	0.000630799	1.51154
23335	WDR7	-0.723813	3.79105	-4.65692	4.6207e-05	0.000630896	1.51016
9118	INA	0.763983	6.52656	4.65542	4.64137e-05	0.000632507	1.5058
151648	SGO1	-0.44858	4.87306	-4.65491	4.64839e-05	0.000632507	1.50432
4313	MMP2	0.690295	4.89361	4.65454	4.65355e-05	0.000632507	1.50324
6746	SSR2	0.295907	8.57773	4.65438	4.65575e-05	0.000632507	1.50278
55775	TDP1	-0.709992	4.49823	-4.65262	4.68022e-05	0.00063504	1.49765
4016	LOXL1	0.636776	5.88927	4.651	4.70282e-05	0.00063707	1.49294
8816	DCAF5	0.496684	6.45633	4.65055	4.70915e-05	0.00063707	1.49163
9620	CELSR1	0.758149	2.98833	4.65029	4.71275e-05	0.00063707	1.49088
10060	ABCC9	-2.80911	1.42705	-4.64898	4.73112e-05	0.000637997	1.48708
10485	C1orf61	0.74652	4.95109	4.6482	4.74224e-05	0.000637997	1.48479
266727	MDGA1	1.71585	2.09359	4.64791	4.74623e-05	0.000637997	1.48396
11108	PRDM4	-0.403208	5.2357	-4.64772	4.74891e-05	0.000637997	1.48341
9718	ECE2	-0.890676	3.63527	-4.64772	4.74892e-05	0.000637997	1.48341
29902	FAM216A	-0.457887	6.93427	-4.64705	4.7585e-05	0.000638496	1.48144
84915	FAM222A	-0.647331	5.12245	-4.63746	4.89622e-05	0.000656165	1.45356
6596	HLTF	-0.518981	6.73244	-4.63607	4.91649e-05	0.000658072	1.44952
8270	LAGE3	-0.491372	5.51583	-4.63548	4.92513e-05	0.000658419	1.44781
9188	DDX21	-0.328027	9.22587	-4.63296	4.96207e-05	0.000662543	1.44051
3746	KCNC1	1.2838	3.24814	4.63145	4.9844e-05	0.000664709	1.43612
10939	AFG3L2	-0.978927	3.45845	-4.62922	5.01766e-05	0.000667752	1.42962
6854	SYN2	-0.625629	4.54887	-4.6291	5.01949e-05	0.000667752	1.42926
123016	TTC8	-0.706155	5.20609	-4.62831	5.03127e-05	0.000668501	1.42697
9734	HDAC9	-0.887684	3.91413	-4.62682	5.05356e-05	0.000670248	1.42265
10723	SLC12A7	0.617516	4.16093	4.62661	5.05673e-05	0.000670248	1.42204
27252	KLHL20	0.385643	5.80371	4.62144	5.13503e-05	0.000679798	1.40703
2274	FHL2	0.496586	5.53957	4.62044	5.15039e-05	0.000680462	1.40411
23326	USP22	0.439081	7.95222	4.6203	5.15255e-05	0.000680462	1.4037
5978	REST	0.529547	6.26205	4.61565	5.22415e-05	0.000689081	1.39022
8337	HIST2H2AA3	-0.717311	4.98615	-4.61425	5.24595e-05	0.000691119	1.38615
481	ATP1B1	-0.540779	8.15722	-4.61315	5.26318e-05	0.00069255	1.38295
132320	SCLT1	-0.511263	5.8856	-4.60793	5.34548e-05	0.00070253	1.36779
11259	FILIP1L	1.50416	3.03406	4.60703	5.35984e-05	0.000703567	1.36517
9941	EXOG	1.19246	3.38893	4.60598	5.37657e-05	0.000704914	1.36213
55825	PECR	-1.04883	2.79395	-4.60236	5.43464e-05	0.000711669	1.35164
285367	RPUSD3	-0.59111	5.15776	-4.59935	5.48341e-05	0.000716636	1.34291
23413	NCS1	-0.440077	6.49847	-4.59921	5.48573e-05	0.000716636	1.3425
6935	ZEB1	-0.51636	7.00244	-4.5898	5.64119e-05	0.000736061	1.31521
3399	ID3	0.797154	6.77135	4.58753	5.67949e-05	0.00074017	1.3086
1182	CLCN3	-0.522755	5.44146	-4.58565	5.71113e-05	0.000743403	1.30318
57616	TSHZ3	0.819424	4.42044	4.58511	5.72038e-05	0.000743718	1.3016
8440	NCK2	0.504669	5.34493	4.58337	5.75003e-05	0.000746681	1.29655
171546	SPTSSA	-0.472831	6.02316	-4.58239	5.76669e-05	0.000747951	1.29372
55605	KIF21A	-0.413882	8.91383	-4.58156	5.78101e-05	0.000748916	1.2913
81669	CCNL2	0.921503	6.62535	4.58069	5.79599e-05	0.000749806	1.28877
53981	CPSF2	-0.345049	6.41876	-4.58036	5.80166e-05	0.000749806	1.28782
7388	UQCRH	-0.370727	9.18896	-4.57928	5.82027e-05	0.000751319	1.28469
460	ASTN1	2.41323	1.20567	4.57202	5.94703e-05	0.000766772	1.26366
125144	LRRC75A-AS1	-1.427	2.4425	-4.57117	5.96209e-05	0.000767804	1.26119
9738	CCP110	-0.503039	7.30479	-4.57033	5.97692e-05	0.000768804	1.25877
10521	DDX17	0.58109	8.84359	4.56865	6.00678e-05	0.000771733	1.2539
2495	FTH1	-0.331718	9.27575	-4.56811	6.01638e-05	0.000772055	1.25234
5241	PGR	-1.45159	2.69659	-4.56715	6.03363e-05	0.000773356	1.24955
57110	HRASLS	-1.34814	4.51906	-4.56675	6.04073e-05	0.000773356	1.2484
79071	ELOVL6	-0.576412	5.67758	-4.56207	6.12515e-05	0.000781967	1.23485
126298	IRGQ	0.625586	5.11552	4.56184	6.12946e-05	0.000781967	1.23416
57451	TENM2	2.11134	1.44407	4.56183	6.12955e-05	0.000781967	1.23415
23598	PATZ1	0.399158	6.65267	4.56113	6.14241e-05	0.000782689	1.2321
483	ATP1B3	-0.27595	7.69062	-4.56056	6.1528e-05	0.000783097	1.23045
1004	CDH6	2.30881	1.71609	4.55836	6.19292e-05	0.000787283	1.22411
730094	C16orf52	0.490738	4.70846	4.55225	6.30628e-05	0.000800758	1.20641
10783	NEK6	1.58262	2.53202	4.55061	6.33704e-05	0.000803726	1.20166
7163	TPD52	-0.617008	5.76937	-4.54992	6.35004e-05	0.000804436	1.19966
10838	ZNF275	0.726783	4.4346	4.54492	6.44476e-05	0.000815487	1.18521
401498	TMEM215	1.2985	2.91261	4.53825	6.57358e-05	0.000830821	1.1659
2026	ENO2	-0.751134	7.20281	-4.53602	6.61706e-05	0.000835347	1.15946
57606	SLAIN2	-0.416164	5.5415	-4.53256	6.68527e-05	0.00084244	1.14946
1021	CDK6	-0.671233	8.27665	-4.53239	6.68873e-05	0.00084244	1.14895
9411	ARHGAP29	1.15473	3.07911	4.53173	6.7017e-05	0.000843097	1.14706
8204	NRIP1	0.486825	6.53556	4.52935	6.74913e-05	0.000848084	1.14018
283431	GAS2L3	-0.615249	4.61855	-4.52867	6.76289e-05	0.000848832	1.1382
9331	B4GALT6	-0.875529	3.43162	-4.52525	6.83168e-05	0.000856479	1.12832
1282	COL4A1	0.602772	5.3546	4.52415	6.85398e-05	0.000858285	1.12514
81490	PTDSS2	-0.886987	3.71215	-4.51875	6.96451e-05	0.000871124	1.10954
10217	CTDSPL	0.848789	3.78499	4.51741	6.99225e-05	0.00087359	1.10566
221491	C6orf1	-0.644404	4.48734	-4.51295	7.08505e-05	0.000884169	1.0928
101927746	LOC101927746	-0.76808	3.22638	-4.50914	7.1655e-05	0.000893184	1.08178
92856	IMP4	-0.463771	5.51857	-4.50762	7.19791e-05	0.000896198	1.07738
84083	ZRANB3	-0.679992	4.0716	-4.50334	7.28953e-05	0.000906568	1.06505
29957	SLC25A24	0.494025	6.11547	4.50049	7.35131e-05	0.000913207	1.05682
8678	BECN1	-1.29878	2.70494	-4.49579	7.45422e-05	0.000924935	1.04326
55082	ARGLU1	0.514949	7.74925	4.4907	7.56739e-05	0.000937908	1.02857
23022	PALLD	0.622078	5.02806	4.48545	7.68595e-05	0.000951519	1.01341
57150	SMIM8	-0.691043	4.1618	-4.48502	7.69571e-05	0.000951644	1.01217
55683	KANSL3	0.390233	6.74406	4.48301	7.7414e-05	0.00095607	1.0064
26519	TIMM10	-0.543282	5.58657	-4.48268	7.74907e-05	0.00095607	1.00544
50804	MYEF2	-0.594019	5.63785	-4.48214	7.76155e-05	0.000956526	1.00387
3084	NRG1	0.783234	3.52189	4.48161	7.77373e-05	0.000956942	1.00234
26503	SLC17A5	-0.913273	3.37816	-4.47589	7.90626e-05	0.000972158	0.985859
653121	ZBTB8A	0.565938	5.08866	4.47483	7.93092e-05	0.000974089	0.982824
5547	PRCP	0.396155	6.13168	4.46836	8.08425e-05	0.000991802	0.964158
57459	GATAD2B	0.32781	7.10541	4.46191	8.23972e-05	0.00100974	0.945592
2771	GNAI2	0.384139	6.37564	4.46107	8.2601e-05	0.0010111	0.943185
389741	GLIDR	0.544495	5.11678	4.45734	8.35187e-05	0.00102118	0.932417
89796	NAV1	0.812921	6.45489	4.45658	8.37061e-05	0.00102232	0.930232
83461	CDCA3	-0.600182	5.74101	-4.45588	8.38783e-05	0.00102328	0.92823
9054	NFS1	-0.621923	4.16754	-4.45545	8.39853e-05	0.00102344	0.926987
439921	MXRA7	-0.534106	5.97268	-4.45153	8.49629e-05	0.00103419	0.91571
1854	DUT	-0.386668	8.55515	-4.44818	8.58082e-05	0.00104245	0.906063
83940	TATDN1	-0.690372	4.78086	-4.44748	8.59847e-05	0.00104245	0.904061
27445	PCLO	-1.21786	3.46321	-4.44733	8.60244e-05	0.00104245	0.903612
1280	COL2A1	1.77965	2.19865	4.44728	8.60368e-05	0.00104245	0.90347
203286	ANKS6	0.543315	4.34074	4.44695	8.61204e-05	0.00104245	0.902525
54461	FBXW5	0.458551	4.99372	4.44317	8.7088e-05	0.00105287	0.891638
10957	PNRC1	0.721591	5.71581	4.44255	8.72467e-05	0.00105287	0.889865
3131	HLF	-1.05006	2.21446	-4.44245	8.72716e-05	0.00105287	0.889587
10078	TSSC4	0.497076	4.93547	4.44154	8.75074e-05	0.00105357	0.886958
2948	GSTM4	-0.486418	4.40256	-4.44148	8.75228e-05	0.00105357	0.886786
84930	MASTL	-0.542986	4.72278	-4.43988	8.79364e-05	0.00105737	0.882192
113451	AZIN2	0.828787	3.33571	4.43917	8.81202e-05	0.00105841	0.880159
111	ADCY5	1.96396	1.54598	4.43602	8.89438e-05	0.00106713	0.871096
3797	KIF3C	0.564896	5.07771	4.43556	8.90664e-05	0.00106742	0.869754
7070	THY1	-0.481864	5.4752	-4.43344	8.96236e-05	0.00107292	0.863677
51571	FAM49B	-0.389782	7.49242	-4.43251	8.98698e-05	0.00107469	0.861005
140735	DYNLL2	0.380259	7.51667	4.4315	9.01387e-05	0.00107672	0.858095
90321	ZNF766	-0.721537	3.61746	-4.42914	9.07687e-05	0.00108305	0.85131
170688	NUDT4P2	-0.61099	4.53678	-4.42549	9.175e-05	0.00109279	0.840836
160897	GPR180	-0.499459	4.67598	-4.42536	9.17854e-05	0.00109279	0.84046
6627	SNRPA1	-0.365678	6.98963	-4.42375	9.22236e-05	0.00109681	0.835821
55616	ASAP3	0.940052	2.86146	4.42116	9.29313e-05	0.00110402	0.828376
27086	FOXP1	0.304411	6.96815	4.41828	9.37231e-05	0.00111221	0.820112
153527	ZMAT2	-0.38851	8.33756	-4.41678	9.41382e-05	0.00111592	0.815808
27152	INTU	-0.895638	3.24352	-4.41534	9.4539e-05	0.00111945	0.81167
861	RUNX1	1.70526	1.53783	4.41405	9.48996e-05	0.0011225	0.807963
4501	MT1X	0.889411	3.40817	4.41306	9.51782e-05	0.00112457	0.805109
4810	NHS	0.946493	2.96654	4.40875	9.63946e-05	0.00113771	0.792741
55366	LGR4	0.969531	3.48396	4.40688	9.69279e-05	0.00114276	0.787369
79140	CCDC28B	-0.982192	2.69847	-4.40619	9.71236e-05	0.00114285	0.785405
79618	HMBOX1	0.575944	5.31427	4.40612	9.71455e-05	0.00114285	0.785185
51295	ECSIT	-0.481317	5.22356	-4.39986	9.89526e-05	0.00116285	0.767239
10220	GDF11	0.482876	5.72844	4.39906	9.91855e-05	0.00116433	0.76495
27092	CACNG4	-0.778931	4.86066	-4.39649	9.99402e-05	0.00117193	0.75757
10106	CTDSP2	0.508772	6.84128	4.39545	0.000100246	0.00117425	0.754594
57821	CCDC181	0.383549	5.85066	4.39397	0.000100684	0.00117811	0.75035
5781	PTPN11	-0.570924	6.25662	-4.39324	0.000100903	0.00117923	0.748235
65260	COA7	-0.715481	4.38894	-4.39292	0.000100996	0.00117923	0.747338
4060	LUM	1.68552	2.9847	4.39041	0.000101746	0.00118671	0.74014
11112	HIBADH	0.87316	3.74713	4.38591	0.000103104	0.00120126	0.727227
3371	TNC	2.52029	1.29271	4.38542	0.000103252	0.0012017	0.725833
55623	THUMPD1	0.416153	6.22005	4.38267	0.000104094	0.0012102	0.717932
79035	NABP2	-0.425901	5.52591	-4.37965	0.000105021	0.00121968	0.709296
84549	MAK16	-0.755892	4.20281	-4.3791	0.000105191	0.00122035	0.707722
9787	DLGAP5	-0.488106	5.95045	-4.37283	0.000107152	0.00124177	0.689749
22856	CHSY1	0.484986	5.92241	4.3718	0.000107479	0.00124424	0.686787
23788	MTCH2	-0.356582	8.30355	-4.37123	0.000107658	0.00124499	0.685159
27173	SLC39A1	0.291283	7.46085	4.37042	0.000107915	0.00124664	0.682843
7337	UBE3A	0.243708	7.97631	4.36906	0.000108348	0.00124991	0.678945
5727	PTCH1	0.557279	4.94491	4.36881	0.000108429	0.00124991	0.678222
27333	GOLIM4	0.456053	7.96461	4.36758	0.000108821	0.00125307	0.674702
5770	PTPN1	0.362132	8.0375	4.36723	0.000108933	0.00125307	0.673707
65082	VPS33A	-0.398882	5.31463	-4.36448	0.000109819	0.00126193	0.665826
7644	ZNF91	-0.773901	3.14343	-4.36005	0.000111258	0.00127712	0.653153
81930	KIF18A	-0.783234	3.79588	-4.3577	0.000112029	0.00128462	0.646433
9129	PRPF3	0.364015	7.35265	4.35544	0.000112777	0.00129107	0.639965
7086	TKT	-0.431722	7.64617	-4.35528	0.000112829	0.00129107	0.639514
23362	PSD3	0.652548	4.89733	4.35181	0.000113986	0.00130294	0.629589
29121	CLEC2D	-0.351086	6.81926	-4.35029	0.000114498	0.00130742	0.625226
6926	TBX3	0.672595	6.9791	4.34889	0.000114968	0.00131041	0.621244
2631	GBAS	-0.314903	6.24898	-4.34879	0.000115001	0.00131041	0.620962
5330	PLCB2	-1.52342	1.63554	-4.34825	0.000115185	0.00131113	0.619411
1284	COL4A2	0.528369	7.07068	4.34499	0.000116295	0.00132185	0.610083
127253	TYW3	-0.5479	6.13035	-4.34436	0.000116508	0.00132185	0.608297
219743	TYSND1	-1.0252	3.17139	-4.34407	0.00011661	0.00132185	0.607448
5937	RBMS1	0.350741	7.30483	4.34406	0.000116612	0.00132185	0.607431
6732	SRPK1	-0.293154	7.58827	-4.34297	0.000116988	0.00132473	0.604296
2104	ESRRG	0.571842	6.24467	4.34241	0.00011718	0.00132553	0.602701
124540	MSI2	0.414543	7.01091	4.3412	0.000117596	0.00132885	0.599256
3705	ITPK1	-0.545714	5.3093	-4.34009	0.00011798	0.00133181	0.596083
147011	PROCA1	-1.26654	1.92644	-4.33944	0.000118207	0.00133298	0.594219
30001	ERO1A	-0.575593	5.80079	-4.33715	0.000119005	0.0013381	0.587674
745	MYRF	0.754082	4.41275	4.33701	0.000119053	0.0013381	0.587278
125228	FAM210A	-0.574146	4.48612	-4.33659	0.000119201	0.0013381	0.586071
6877	TAF5	-0.564551	5.05301	-4.33659	0.000119201	0.0013381	0.58607
10953	TOMM34	-0.379351	6.03981	-4.33638	0.000119276	0.0013381	0.585464
11235	PDCD10	-0.489384	5.58394	-4.33492	0.000119786	0.00134244	0.581314
65997	RASL11B	1.01231	4.4822	4.33312	0.000120422	0.00134819	0.576158
9953	HS3ST3B1	1.7513	1.39615	4.33033	0.000121415	0.0013579	0.568178
5529	PPP2R5E	-0.334918	7.89932	-4.32843	0.000122094	0.00136211	0.562752
729533	FAM72A	-0.890207	3.84832	-4.32838	0.000122109	0.00136211	0.562634
84814	PLPP7	-1.28211	2.63737	-4.32822	0.000122167	0.00136211	0.562172
79605	PGBD5	2.3181	2.67835	4.32373	0.00012379	0.0013788	0.549335
89927	C16orf45	0.607406	5.06054	4.319	0.00012552	0.00139663	0.535842
27000	DNAJC2	-0.414999	6.95948	-4.31847	0.000125713	0.00139736	0.534344
6197	RPS6KA3	-0.490513	5.33897	-4.31702	0.000126251	0.0014019	0.530194
55917	CTTNBP2NL	0.440628	5.80416	4.31599	0.000126634	0.00140473	0.527247
134430	WDR36	-0.42798	5.39707	-4.31511	0.000126961	0.00140692	0.524741
51167	CYB5R4	-0.679864	3.75141	-4.31421	0.000127297	0.0014092	0.522177
9760	TOX	0.861289	4.16053	4.31314	0.000127699	0.00140972	0.51911
55859	BEX1	0.360655	8.92068	4.31305	0.000127731	0.00140972	0.518864
91433	RCCD1	-0.499627	5.6737	-4.31305	0.000127732	0.00140972	0.518854
23639	LRRC6	1.39856	2.79234	4.31265	0.000127881	0.00140993	0.517724
1108	CHD4	0.360373	8.95306	4.30925	0.000129163	0.00142263	0.508024
9133	CCNB2	-0.38811	6.92723	-4.30742	0.000129858	0.00142883	0.502812
57666	FBRSL1	0.450939	6.38278	4.30681	0.000130091	0.00142995	0.501068
56915	EXOSC5	-0.552775	6.26154	-4.30273	0.000131658	0.00144571	0.489427
10912	GADD45G	-1.42818	4.3622	-4.302	0.000131939	0.00144734	0.487353
104310353	LINC01399	-1.3508	2.53103	-4.29387	0.000135122	0.00148076	0.464189
23231	SEL1L3	0.809964	4.05554	4.29296	0.000135482	0.00148322	0.461599
1033	CDKN3	-0.567346	5.39969	-4.29212	0.000135817	0.00148538	0.459203
92482	BBIP1	-0.505487	4.27382	-4.28911	0.000137019	0.00149703	0.450636
5498	PPOX	-0.40481	4.63088	-4.28823	0.000137376	0.00149943	0.448108
1289	COL5A1	0.776143	5.10634	4.28452	0.000138877	0.00151429	0.437546
538	ATP7A	-0.909877	4.36536	-4.28082	0.000140391	0.00152927	0.42701
79187	FSD1	-0.38809	5.23762	-4.27984	0.000140792	0.0015316	0.424243
8549	LGR5	1.8975	3.02596	4.27953	0.000140923	0.0015316	0.42334
80339	PNPLA3	-0.888328	3.71476	-4.27927	0.000141028	0.0015316	0.422617
10135	NAMPT	-0.623594	5.272	-4.27828	0.000141439	0.00153454	0.419784
89910	UBE3B	-0.538951	5.20334	-4.27779	0.000141642	0.0015352	0.418395
55219	TMEM57	0.305446	6.76347	4.27582	0.000142463	0.00154257	0.412781
55957	LIN37	-0.659798	3.21197	-4.27234	0.00014392	0.00155533	0.402894
2257	FGF12	1.23268	2.90444	4.27232	0.000143927	0.00155533	0.402843
23272	FAM208A	-0.58042	5.06929	-4.27165	0.000144211	0.00155685	0.40093
283659	PRTG	-1.0132	3.45634	-4.26324	0.000147806	0.00159408	0.37701
1271	CNTFR	0.644574	5.48153	4.26233	0.000148202	0.00159676	0.374415
91768	CABLES1	-0.795397	3.55703	-4.25976	0.00014932	0.0016058	0.367112
6530	SLC6A2	-0.755321	5.59665	-4.25972	0.000149336	0.0016058	0.36701
100130417	LOC100130417	1.86623	2.25452	4.25773	0.000150209	0.0016136	0.361345
9377	COX5A	-0.300335	8.73317	-4.25694	0.000150557	0.00161508	0.359102
25902	MTHFD1L	-0.581635	5.65631	-4.25648	0.000150761	0.00161508	0.357784
22803	XRN2	0.289792	8.34	4.2564	0.000150793	0.00161508	0.357581
8458	TTF2	-0.524285	5.54903	-4.2551	0.000151371	0.00161969	0.35386
55351	STK32B	2.40273	1.35425	4.25063	0.00015336	0.00163809	0.341182
154796	AMOT	0.793266	4.48301	4.25056	0.000153393	0.00163809	0.340979
57144	PAK5	1.82413	1.88869	4.2485	0.000154318	0.00164636	0.335137
94235	GNG8	-1.79034	2.43166	-4.24368	0.000156509	0.00166515	0.321448
4017	LOXL2	0.905792	3.54179	4.24363	0.000156533	0.00166515	0.3213
220963	SLC16A9	1.60012	3.89818	4.24362	0.000156538	0.00166515	0.321267
8867	SYNJ1	-0.676656	3.13975	-4.2424	0.000157097	0.00166946	0.317807
55643	BTBD2	0.438997	5.89224	4.24175	0.000157398	0.00166957	0.31595
11339	OIP5	-0.495715	5.27041	-4.24151	0.000157507	0.00166957	0.315278
23043	TNIK	0.658961	4.89007	4.24138	0.000157567	0.00166957	0.314907
8111	GPR68	2.51674	0.383193	4.23516	0.000160459	0.00169856	0.297246
4999	ORC2	-0.460272	5.01576	-4.23304	0.000161454	0.00170742	0.291249
150	ADRA2A	1.14746	2.12684	4.23241	0.000161752	0.00170891	0.289459
4026	LPP	0.834649	3.53239	4.23202	0.000161938	0.00170922	0.288342
23236	PLCB1	-0.445956	6.32734	-4.23148	0.00016219	0.00171023	0.286828
84515	MCM8	-0.604984	4.44446	-4.22963	0.000163071	0.00171722	0.281571
60558	GUF1	-0.483412	5.3441	-4.22943	0.000163169	0.00171722	0.280991
5997	RGS2	-0.581855	7.00455	-4.22887	0.000163432	0.00171832	0.279426
2171	FABP5	-1.07937	3.04696	-4.22823	0.000163738	0.00171988	0.277612
118429	ANTXR2	0.91135	6.27059	4.22493	0.000165326	0.00173489	0.26824
93594	TBC1D31	-0.50523	4.2003	-4.22335	0.000166093	0.00174125	0.263749
5578	PRKCA	0.677585	4.15635	4.22252	0.000166495	0.00174349	0.261402
51805	COQ3	-0.670971	3.88752	-4.22195	0.000166771	0.00174349	0.259793
3714	JAG2	1.38983	2.81883	4.22192	0.000166786	0.00174349	0.259704
54877	ZCCHC2	-0.809763	3.89195	-4.22113	0.00016717	0.00174582	0.257476
3237	HOXD11	0.674342	4.89684	4.21805	0.000168681	0.00175991	0.24874
1649	DDIT3	-2.21117	3.24905	-4.21504	0.000170172	0.00177376	0.240202
429	ASCL1	-0.503924	9.21852	-4.21378	0.000170797	0.00177593	0.236642
4090	SMAD5	0.357044	7.3483	4.21369	0.000170842	0.00177593	0.236389
2907	GRINA	0.372937	6.55928	4.21364	0.000170869	0.00177593	0.236235
51573	GDE1	-0.472901	6.89845	-4.21177	0.000171802	0.00178354	0.230947
93185	IGSF8	0.786662	3.70191	4.21129	0.000172041	0.00178354	0.2296
84273	NOA1	-0.579497	5.30399	-4.21119	0.000172093	0.00178354	0.229307
5910	RAP1GDS1	-0.458939	5.51117	-4.21074	0.00017232	0.00178419	0.228031
9607	CARTPT	3.65198	-0.399435	4.20856	0.00017342	0.00179388	0.221852
6444	SGCD	1.76194	0.505161	4.20784	0.000173785	0.00179594	0.219813
57118	CAMK1D	0.562217	5.39928	4.20544	0.000175007	0.00180685	0.213016
23295	MGRN1	0.569713	5.22161	4.20273	0.000176393	0.00181645	0.205362
91300	R3HDM4	0.520416	5.18704	4.2027	0.000176411	0.00181645	0.205264
57600	FNIP2	0.416221	6.15502	4.20262	0.000176453	0.00181645	0.205031
54918	CMTM6	0.2924	6.64927	4.20232	0.000176604	0.00181645	0.204199
259266	ASPM	-0.626737	7.87623	-4.20055	0.000177519	0.00182319	0.199185
8720	MBTPS1	0.309076	5.93506	4.20035	0.000177622	0.00182319	0.198627
7857	SCG2	-0.596366	7.1813	-4.20008	0.000177762	0.00182319	0.197862
55157	DARS2	-0.464442	5.29858	-4.19957	0.000178027	0.00182419	0.196414
115286	SLC25A26	-0.496434	5.00866	-4.19866	0.0001785	0.00182731	0.193841
84969	TOX2	0.800346	5.04815	4.19729	0.000179218	0.00183294	0.189947
6879	TAF7	0.256057	7.47112	4.19606	0.000179861	0.00183779	0.186469
84279	PRADC1	-0.573986	4.1659	-4.19534	0.000180237	0.00183991	0.184445
146206	CARMIL2	1.60355	2.28124	4.19465	0.000180598	0.00184187	0.182502
64326	RFWD2	0.380349	5.9814	4.1942	0.000180837	0.00184257	0.181222
8727	CTNNAL1	-0.44876	6.08611	-4.19177	0.000182125	0.00185396	0.174336
79567	FAM65A	0.628596	4.90384	4.19084	0.000182618	0.00185724	0.171714
9353	SLIT2	1.04721	3.62445	4.18928	0.00018345	0.00186396	0.167304
84548	TMEM185A	0.637377	3.86533	4.18868	0.00018377	0.00186547	0.165616
51435	SCARA3	-0.606765	5.1188	-4.18763	0.000184337	0.0018687	0.162628
2686	GGT7	0.911105	4.49402	4.18724	0.000184546	0.0018687	0.161526
54477	PLEKHA5	0.48575	6.08778	4.18713	0.000184603	0.0018687	0.161227
5058	PAK1	0.594182	6.07131	4.18678	0.000184794	0.00186889	0.160226
57085	AGTRAP	-0.575908	3.72118	-4.18576	0.000185341	0.00187269	0.157357
57720	GPR107	0.384998	6.18311	4.18365	0.000186486	0.0018825	0.151385
23474	ETHE1	0.46657	4.99488	4.18173	0.000187531	0.0018913	0.145963
5092	PCBD1	-0.511627	5.4569	-4.1814	0.000187712	0.00189137	0.145028
116224	FAM122A	0.851612	3.44868	4.18058	0.00018816	0.00189414	0.142715
136227	COL26A1	2.00573	2.10655	4.17994	0.000188511	0.00189591	0.140908
51520	LARS	-0.504029	7.40815	-4.17797	0.0001896	0.0019051	0.135323
51596	CUTA	-0.349755	7.30192	-4.17712	0.000190069	0.00190805	0.132928
23277	CLUH	-0.436902	6.3225	-4.17637	0.000190485	0.00190956	0.130805
26134	RALGAPA1P1	-1.85699	1.76312	-4.17621	0.00019057	0.00190956	0.130373
10586	MAB21L2	0.683777	5.5597	4.17508	0.000191197	0.00191408	0.127187
9557	CHD1L	0.285443	7.66724	4.17474	0.000191389	0.00191425	0.126214
8725	URI1	-0.358905	7.45007	-4.1693	0.000194446	0.00194303	0.110851
55672	NBPF1	0.762836	3.77339	4.16685	0.00019584	0.00195377	0.103923
9783	RIMS3	-0.796068	5.89392	-4.16647	0.000196056	0.00195377	0.102854
57690	TNRC6C	0.530157	6.20644	4.16646	0.000196059	0.00195377	0.102841
9168	TMSB10	0.529887	10.3643	4.16582	0.000196428	0.00195566	0.101016
5362	PLXNA2	1.18971	4.8638	4.16163	0.000198834	0.0019778	0.0892124
81624	DIAPH3	-0.535423	5.79446	-4.16014	0.000199701	0.00198461	0.0849941
149371	EXOC8	-0.609526	4.20724	-4.15931	0.000200182	0.00198757	0.0826635
56917	MEIS3	0.525889	6.22633	4.15543	0.000202457	0.00200833	0.0717072
55771	PRR11	-0.445585	7.57815	-4.15462	0.000202934	0.00201123	0.0694256
9948	WDR1	0.503436	5.71343	4.15297	0.000203912	0.00201758	0.064766
64838	FNDC4	0.832126	3.05635	4.15291	0.000203946	0.00201758	0.0646052
56983	POGLUT1	0.443275	5.58357	4.14785	0.00020697	0.00204564	0.0503399
23316	CUX2	1.20056	3.44687	4.14654	0.000207761	0.00204986	0.0466412
56907	SPIRE1	-0.450234	5.04443	-4.14652	0.000207774	0.00204986	0.0465825
4851	NOTCH1	1.41147	2.7637	4.14562	0.000208315	0.00205333	0.0440628
121268	RHEBL1	-0.966639	3.29434	-4.14402	0.000209284	0.00206102	0.0395631
79094	CHAC1	-3.41844	4.41195	-4.14309	0.000209856	0.00206478	0.0369199
1000	CDH2	0.463446	7.90556	4.14164	0.00021074	0.00207161	0.0328446
3486	IGFBP3	2.19774	3.4643	4.14084	0.00021123	0.00207455	0.0305948
10379	IRF9	0.79579	3.68813	4.13316	0.000216	0.00211948	0.00895628
285513	GPRIN3	0.793814	4.15305	4.13278	0.000216235	0.00211989	0.00789941
100506258	LOC100506258	-1.34576	-0.176503	-4.13202	0.000216712	0.00212265	0.00576562
1819	DRG2	-0.810156	2.79459	-4.1287	0.000218814	0.00214131	-0.00358739
9077	DIRAS3	1.28955	2.80647	4.12754	0.000219556	0.00214664	-0.00686528
23152	CIC	0.539664	5.29553	4.12571	0.000220722	0.0021561	-0.0119968
3251	HPRT1	-0.484161	5.16758	-4.12285	0.000222565	0.00217216	-0.0200542
2187	FANCB	-0.814394	3.27629	-4.12035	0.000224187	0.00218602	-0.0270858
79608	RIC3	1.83221	1.73239	4.11916	0.000224959	0.00219159	-0.0304166
55131	RBM28	-0.523564	6.07454	-4.11765	0.000225951	0.00219733	-0.0346813
55288	RHOT1	-0.503649	4.89201	-4.11765	0.000225952	0.00219733	-0.0346828
115509	ZNF689	0.443603	5.35633	4.11647	0.000226723	0.00220285	-0.0379814
2324	FLT4	0.841575	3.46153	4.1145	0.000228023	0.00221351	-0.0435212
23528	ZNF281	0.484865	7.11408	4.11301	0.000229012	0.0022208	-0.0477113
23405	DICER1	0.432164	7.00725	4.11267	0.000229237	0.0022208	-0.0486633
9246	UBE2L6	0.480412	6.43123	4.11245	0.000229386	0.0022208	-0.0492926
2334	AFF2	1.77677	0.640221	4.11121	0.00023021	0.00222679	-0.0527656
55013	MCUB	-0.529536	3.9743	-4.11068	0.000230566	0.00222799	-0.0542632
51319	RSRC1	-0.397417	7.27733	-4.11025	0.000230852	0.00222799	-0.0554624
10614	HEXIM1	0.464342	5.74338	4.11011	0.000230948	0.00222799	-0.0558653
9538	EI24	-0.276619	7.40958	-4.10734	0.000232815	0.0022431	-0.063662
2898	GRIK2	1.10117	2.516	4.10717	0.000232927	0.0022431	-0.0641278
11023	VAX1	1.2907	0.929762	4.10608	0.000233664	0.00224822	-0.0671892
1949	EFNB3	1.00247	3.77744	4.10375	0.000235251	0.00226148	-0.0737429
9590	AKAP12	0.831291	8.628	4.10162	0.000236706	0.00227347	-0.0797163
55753	OGDHL	-0.798739	3.85702	-4.09455	0.000241606	0.00231848	-0.0995536
11228	RASSF8	0.677198	4.07491	4.09301	0.000242691	0.00232684	-0.10389
2009	EML1	0.794642	3.07558	4.09263	0.000242957	0.00232734	-0.104953
5557	PRIM1	-0.549604	5.02957	-4.08919	0.000245389	0.00234857	-0.114594
200150	PLD5	-0.864641	3.12453	-4.08818	0.000246111	0.00235341	-0.117437
2258	FGF13	1.81772	1.99242	4.08689	0.000247028	0.00235903	-0.12104
6194	RPS6	0.577212	12.5027	4.08645	0.000247345	0.00235903	-0.122281
406	ARNTL	1.51233	2.38928	4.08645	0.000247349	0.00235903	-0.122295
10056	FARSB	-0.398131	7.26795	-4.08488	0.000248474	0.00236769	-0.12669
5699	PSMB10	-0.563993	5.62672	-4.08404	0.00024908	0.00236954	-0.129046
26278	SACS	-0.669854	5.43786	-4.08401	0.000249104	0.00236954	-0.129141
55692	LUC7L	0.433508	7.16863	4.08295	0.000249865	0.0023747	-0.132093
25996	REXO2	-0.456662	5.55347	-4.08127	0.000251085	0.00238421	-0.136805
6881	TAF10	-0.456777	5.093	-4.07887	0.000252838	0.00239877	-0.143542
23421	ITGB3BP	-0.449015	5.94655	-4.07393	0.000256476	0.00243116	-0.157368
25789	TMEM59L	0.930376	3.0395	4.07341	0.000256866	0.00243273	-0.158837
10664	CTCF	0.354616	7.51964	4.07307	0.00025712	0.00243303	-0.159796
56997	COQ8A	-0.739765	4.30141	-4.07272	0.00025738	0.00243337	-0.160771
1471	CST3	0.512933	6.1838	4.07227	0.000257716	0.00243443	-0.162036
60312	AFAP1	-0.431323	5.51767	-4.07081	0.000258804	0.00244259	-0.166111
1495	CTNNA1	0.358473	6.57914	4.06802	0.000260906	0.0024603	-0.17394
8408	ULK1	0.537884	5.68076	4.06721	0.00026152	0.00246395	-0.176214
64087	MCCC2	-0.461499	5.47088	-4.0667	0.000261904	0.00246543	-0.177635
25915	NDUFAF3	-0.408815	6.01004	-4.06395	0.000263995	0.00248297	-0.18533
9330	GTF3C3	-0.328827	6.08933	-4.06299	0.000264732	0.00248719	-0.188025
2027	ENO3	-0.640339	4.79548	-4.06277	0.000264901	0.00248719	-0.188643
7804	LRP8	-0.657679	5.73139	-4.06006	0.00026698	0.00250455	-0.196208
375449	MAST4	0.774402	3.94773	4.05905	0.000267764	0.00250974	-0.199046
55577	NAGK	0.672624	4.18691	4.05712	0.000269265	0.00252164	-0.204452
2876	GPX1	-0.447096	5.81944	-4.05594	0.000270181	0.00252803	-0.207736
402665	IGLON5	2.35939	0.793464	4.05432	0.000271453	0.00253776	-0.212281
10681	GNB5	0.612758	3.54563	4.05277	0.000272671	0.00254696	-0.216612
57709	SLC7A14	2.23341	2.55511	4.05212	0.000273179	0.00254925	-0.218414
10766	TOB2	0.390926	6.24545	4.05186	0.000273385	0.00254925	-0.219142
9131	AIFM1	-0.339819	5.82271	-4.05023	0.000274681	0.0025585	-0.223716
9792	SERTAD2	0.549917	5.2062	4.05002	0.000274847	0.0025585	-0.224302
124808	CCDC43	-0.463703	5.82442	-4.04887	0.000275764	0.00256175	-0.227522
10929	SRSF8	0.446636	6.23072	4.04886	0.000275772	0.00256175	-0.227549
100505495	PCAT19	2.13635	-0.207095	4.04869	0.000275903	0.00256175	-0.22801
10961	ERP29	-0.479581	7.42997	-4.041	0.000282104	0.0026171	-0.249507
79001	VKORC1	-0.435274	7.36439	-4.0389	0.000283817	0.00262937	-0.255363
79135	APOO	-0.456349	4.87132	-4.03879	0.00028391	0.00262937	-0.255679
64151	NCAPG	-0.641601	5.83483	-4.03843	0.000284207	0.00262988	-0.256689
27102	EIF2AK1	-0.256121	7.40116	-4.03592	0.000286273	0.00264484	-0.263693
9543	IGDCC3	0.743799	6.36039	4.03556	0.000286567	0.00264484	-0.264686
622	BDH1	-0.676141	4.46774	-4.03534	0.000286754	0.00264484	-0.265319
22974	TPX2	-0.371697	7.96499	-4.03529	0.000286795	0.00264484	-0.265456
8463	TEAD2	0.582209	6.54791	4.03367	0.000288138	0.00265497	-0.269973
649	BMP1	0.604903	3.14504	4.03091	0.000290444	0.00267396	-0.277682
9532	BAG2	-0.545763	5.15853	-4.02988	0.000291311	0.00267956	-0.280561
282974	STK32C	-0.932575	3.12857	-4.0296	0.000291546	0.00267956	-0.281342
25929	GEMIN5	-0.499909	5.56044	-4.02878	0.000292236	0.00268364	-0.283628
23396	PIP5K1C	0.57892	4.6695	4.02685	0.000293864	0.00269632	-0.289
92609	TIMM50	-0.3375	6.72065	-4.02551	0.000295006	0.00270451	-0.292747
339229	OXLD1	-0.566509	5.42147	-4.02064	0.000299185	0.00274051	-0.306347
22	ABCB7	-0.402632	5.41492	-4.01882	0.000300752	0.00275256	-0.311398
10579	TACC2	-0.56414	4.15	-4.01735	0.000302034	0.00276196	-0.315507
64332	NFKBIZ	1.73748	1.88036	4.01671	0.000302593	0.00276475	-0.317296
25945	NECTIN3	-0.545686	5.81449	-4.01609	0.000303135	0.00276738	-0.319027
51550	CINP	-0.482658	4.44836	-4.01292	0.000305915	0.00279042	-0.327849
2011	MARK2	0.385149	5.49636	4.01164	0.000307051	0.00279843	-0.331432
168455	CCDC71L	-1.16147	4.38808	-4.01106	0.000307558	0.00280071	-0.333025
5311	PKD2	0.631447	4.6037	4.01055	0.000308016	0.00280253	-0.334465
9510	ADAMTS1	1.12488	3.84533	4.01023	0.000308299	0.00280276	-0.335351
55630	SLC39A4	-0.77922	4.31136	-4.00965	0.000308815	0.00280511	-0.336968
55964	SEPT3	0.546398	5.35116	4.00794	0.000310344	0.00281665	-0.341741
3106	HLA-B	2.85541	1.03105	4.00664	0.000311501	0.00282479	-0.345337
400043	LOC400043	-0.505087	5.18748	-4.00493	0.000313048	0.00283646	-0.350124
5902	RANBP1	-0.299102	7.95282	-4.00139	0.00031625	0.00286202	-0.359958
3397	ID1	0.905135	6.51333	4.00124	0.000316395	0.00286202	-0.3604
7077	TIMP2	0.394485	7.73009	4.00067	0.000316906	0.00286427	-0.361962
5970	RELA	0.381682	6.21966	4.00017	0.000317368	0.00286605	-0.363367
5771	PTPN2	-0.357768	5.0122	-3.99967	0.00031782	0.00286776	-0.364743
145864	HAPLN3	1.24646	2.73641	3.99731	0.000319993	0.00288498	-0.371328
1462	VCAN	0.688446	6.78136	3.99431	0.000322766	0.00290757	-0.379664
389538	MGC72080	-0.859062	3.31959	-3.99016	0.00032665	0.00294012	-0.39122
10063	COX17	-0.476596	8.05393	-3.98947	0.000327296	0.0029435	-0.393127
100507602	TRIM52-AS1	-0.621362	4.10489	-3.98831	0.000328394	0.00295094	-0.396363
7416	VDAC1	-0.310868	7.72552	-3.98781	0.000328867	0.00295256	-0.397753
55706	NDC1	-0.324119	6.52981	-3.98754	0.000329117	0.00295256	-0.398489
10622	POLR3G	-0.823959	4.05914	-3.98413	0.000332372	0.00297826	-0.407994
114971	PTPMT1	-0.407321	5.96232	-3.98396	0.000332529	0.00297826	-0.408451
64223	MLST8	-0.976385	2.56286	-3.98331	0.000333156	0.00298142	-0.41027
190	NR0B1	2.60586	1.40109	3.9825	0.000333933	0.00298591	-0.412519
10907	TXNL4A	-0.221369	7.4574	-3.98176	0.000334642	0.0029898	-0.414569
10274	STAG1	0.445967	5.21155	3.97876	0.00033754	0.00301322	-0.422897
1676	DFFA	-0.529299	5.22454	-3.97577	0.00034046	0.00303679	-0.431214
25832	NBPF14	0.556098	5.04343	3.97469	0.000341513	0.00304369	-0.434198
6880	TAF9	-0.8265	4.0832	-3.97233	0.000343847	0.00306199	-0.440776
64400	AKTIP	-1.07109	2.83372	-3.97162	0.00034454	0.00306565	-0.44272
134637	ADAT2	-0.860423	3.96882	-3.97085	0.000345309	0.00306998	-0.444873
6652	SORD	-0.690465	3.97233	-3.97008	0.000346079	0.00307431	-0.447022
55226	NAT10	-0.435997	6.75816	-3.96911	0.000347045	0.00307746	-0.449715
100189284	TRG-GCC1-5	-0.748257	3.48517	-3.96904	0.000347111	0.00307746	-0.449899
51287	COA4	-0.410862	6.86021	-3.96887	0.000347282	0.00307746	-0.450374
8195	MKKS	-0.422029	5.4121	-3.96687	0.000349287	0.00309271	-0.455931
11169	WDHD1	-0.502213	5.47019	-3.96574	0.000350419	0.00309777	-0.459055
5295	PIK3R1	0.60455	5.59922	3.96573	0.000350428	0.00309777	-0.45908
3675	ITGA3	1.02006	2.30749	3.96425	0.000351921	0.00310844	-0.463184
9522	SCAMP1	-0.446041	6.59855	-3.9625	0.000353692	0.00312139	-0.468032
6470	SHMT1	-1.09167	2.92541	-3.96224	0.00035396	0.00312139	-0.468764
57761	TRIB3	-1.56952	4.35269	-3.95991	0.000356337	0.00313981	-0.475225
219699	UNC5B	0.528826	7.92607	3.9595	0.000356757	0.00314096	-0.476361
1113	CHGA	-0.781628	10.141	-3.95796	0.000358342	0.00315237	-0.480643
288	ANK3	0.817134	4.10138	3.95472	0.000361691	0.00317818	-0.489622
467	ATF3	-1.85288	3.15498	-3.95456	0.00036186	0.00317818	-0.490072
4644	MYO5A	0.820126	3.72713	3.95406	0.000362374	0.00318012	-0.491441
100846999	MIR4444-2	-1.07375	3.99445	-3.95289	0.000363593	0.00318653	-0.494684
10682	EBP	-0.28831	6.98494	-3.9528	0.00036369	0.00318653	-0.494941
6415	SELENOW	0.51348	7.62096	3.95108	0.000365492	0.00319975	-0.499713
11022	TDRKH	-0.582285	4.54002	-3.95032	0.000366287	0.00320413	-0.501808
55070	DET1	-0.586891	3.24492	-3.94534	0.000371558	0.00324763	-0.515599
100628315	DNM3OS	2.63955	1.03025	3.93927	0.000378088	0.00330205	-0.53241
5728	PTEN	0.447788	5.6613	3.9382	0.000379246	0.00330951	-0.535361
129080	EMID1	2.02053	1.44335	3.93714	0.000380411	0.00331701	-0.538321
57168	ASPHD2	1.04235	3.24175	3.93599	0.000381659	0.00332523	-0.54148
1352	COX10	-0.49119	4.41216	-3.93515	0.000382583	0.00332724	-0.543815
83540	NUF2	-0.348895	8.18201	-3.93506	0.000382685	0.00332724	-0.54407
113246	C12orf57	0.389093	7.72444	3.93488	0.000382883	0.00332724	-0.544571
9568	GABBR2	-1.62929	2.35099	-3.93467	0.000383112	0.00332724	-0.545148
8722	CTSF	-0.463978	4.81386	-3.93418	0.000383648	0.00332923	-0.546495
10184	LHFPL2	0.942631	3.22467	3.93054	0.000387669	0.00336145	-0.556556
84722	PSRC1	-0.391061	5.66518	-3.93006	0.000388207	0.00336343	-0.557893
167691	LCA5	-0.833439	4.00289	-3.92664	0.000392028	0.00339383	-0.567341
26354	GNL3	-0.739236	4.67326	-3.92497	0.000393915	0.00340746	-0.571974
4580	MTX1	-0.452924	5.89508	-3.92389	0.000395129	0.00341524	-0.574941
100507171	BOLA3-AS1	-0.617934	4.41046	-3.92309	0.000396037	0.00342002	-0.577156
9895	TECPR2	0.523714	4.35303	3.92285	0.00039631	0.00342002	-0.577821
10134	BCAP31	-0.361875	6.87886	-3.92255	0.00039665	0.00342024	-0.578647
6791	AURKAPS1	-0.81591	3.16892	-3.91763	0.000402286	0.00346609	-0.592257
950	SCARB2	-0.311145	7.03047	-3.91426	0.000406182	0.0034969	-0.601552
55161	TMEM33	-0.396864	7.14554	-3.91284	0.000407842	0.00350841	-0.605485
3223	HOXC6	0.452494	5.67449	3.90646	0.000415355	0.00356897	-0.623087
285753	CEP57L1	-0.705705	4.23783	-3.90631	0.000415538	0.00356897	-0.62351
444	ASPH	-0.452837	5.43395	-3.90598	0.000415926	0.00356949	-0.624412
27344	PCSK1N	0.797557	4.82097	3.90566	0.000416306	0.0035695	-0.625291
162394	SLFN5	2.42899	0.306983	3.90543	0.000416584	0.0035695	-0.625935
3159	HMGA1	-0.299867	9.36043	-3.90461	0.000417559	0.00357504	-0.628189
27243	CHMP2A	-0.394976	5.99929	-3.90316	0.00041929	0.00358704	-0.632178
80021	TMEM62	-0.791223	2.96894	-3.90185	0.000420867	0.0035977	-0.635797
83479	DDX59	-0.725489	3.38678	-3.89966	0.000423514	0.003614	-0.641842
1871	E2F3	0.359057	6.62592	3.89954	0.000423661	0.003614	-0.642176
4752	NEK3	-0.714746	4.44905	-3.8994	0.000423827	0.003614	-0.642553
84306	PDCD2L	-0.540298	4.58759	-3.89902	0.000424288	0.003614	-0.643602
84300	UQCC2	-0.561711	5.22183	-3.8989	0.000424434	0.003614	-0.643933
150465	TTL	-0.337697	7.04969	-3.89746	0.000426186	0.00362608	-0.647905
4240	MFGE8	0.541727	5.20939	3.89571	0.000428322	0.00364141	-0.652725
7629	ZNF76	0.596636	4.15475	3.89375	0.000430738	0.00365754	-0.658146
23040	MYT1L	-1.64555	1.53532	-3.89362	0.000430892	0.00365754	-0.658491
140890	SREK1	0.323951	8.49702	3.89314	0.000431482	0.00365969	-0.659809
5334	PLCL1	1.9615	1.11722	3.89284	0.000431859	0.00366004	-0.660651
79658	ARHGAP10	0.522945	4.3366	3.89125	0.000433819	0.00367379	-0.665015
170960	ZNF721	-0.692146	3.33246	-3.89081	0.000434367	0.00367557	-0.666232
4659	PPP1R12A	0.299493	7.83862	3.88987	0.000435542	0.00368265	-0.668836
9638	FEZ1	0.932608	3.56904	3.88913	0.00043646	0.00368754	-0.670864
10360	NPM3	-0.408705	7.30933	-3.88527	0.000441297	0.00372552	-0.681486
613227	HIGD1C	-1.91647	0.931399	-3.88317	0.000443953	0.00374503	-0.687269
79616	CCNJL	0.686204	3.88597	3.8814	0.000446209	0.00375894	-0.692155
10522	DEAF1	-0.474249	4.92646	-3.88133	0.000446292	0.00375894	-0.692334
254359	ZDHHC24	-0.722025	3.28998	-3.8796	0.000448512	0.00377472	-0.697115
400629	TEX19	-1.19858	3.40203	-3.87915	0.000449079	0.00377487	-0.698332
9500	MAGED1	0.453642	7.00633	3.87904	0.000449224	0.00377487	-0.698645
151194	METTL21A	-0.494205	4.49699	-3.87545	0.000453857	0.00381086	-0.708529
9215	LARGE1	0.476521	3.925	3.87467	0.000454866	0.00381639	-0.71067
100506421	LINC01158	-1.60464	-0.151146	-3.87187	0.000458511	0.003844	-0.718359
3980	LIG3	-0.340932	5.95737	-3.8689	0.000462415	0.00387375	-0.726528
56998	CTNNBIP1	0.546624	4.36243	3.86861	0.000462797	0.00387396	-0.727322
55512	SMPD3	-0.951202	2.55435	-3.86808	0.000463501	0.00387688	-0.728787
1729	DIAPH1	-0.350278	6.57223	-3.86733	0.0004645	0.00387974	-0.73086
55593	OTUD5	0.390784	5.73221	3.86728	0.000464556	0.00387974	-0.730976
164832	LONRF2	1.15352	3.50753	3.8667	0.000465325	0.00388318	-0.732569
10181	RBM5	0.706552	5.82791	3.86425	0.000468598	0.0039075	-0.739322
441531	PGAM4	-0.503161	5.63606	-3.86317	0.00047004	0.00391652	-0.742281
56935	SMCO4	-0.37968	6.5549	-3.86287	0.000470444	0.00391689	-0.743109
25880	TMEM186	-0.410199	4.8007	-3.86224	0.000471291	0.00391819	-0.744841
4803	NGF	1.60976	-0.0773821	3.86222	0.00047132	0.00391819	-0.744901
7171	TPM4	0.310836	7.56156	3.86039	0.000473783	0.00393348	-0.749921
9824	ARHGAP11A	-0.350201	5.10501	-3.86031	0.000473882	0.00393348	-0.750123
57124	CD248	1.2802	2.35103	3.85965	0.00047478	0.00393752	-0.751945
55768	NGLY1	-0.639973	4.49884	-3.85942	0.000475093	0.00393752	-0.752579
286144	TRIQK	-0.736447	4.00911	-3.85899	0.000475678	0.00393937	-0.753765
27042	DIEXF	-0.407225	4.89391	-3.85705	0.000478318	0.00395822	-0.759096
200916	RPL22L1	-0.612273	7.56177	-3.85668	0.000478818	0.00395934	-0.760102
56936	CCDC177	2.60295	1.5599	3.85578	0.000480055	0.00396656	-0.762587
51186	TCEAL9	0.340175	7.70131	3.85357	0.000483084	0.00398856	-0.768644
27113	BBC3	-1.36978	4.97671	-3.85264	0.00048436	0.00399607	-0.771185
84154	RPF2	-0.351883	6.95833	-3.85178	0.000485549	0.00400284	-0.773545
80331	DNAJC5	0.386388	7.10378	3.85046	0.000487386	0.00401308	-0.777181
22983	MAST1	-0.549471	4.6506	-3.85036	0.000487529	0.00401308	-0.777464
5576	PRKAR2A	-0.225463	7.36655	-3.84536	0.00049452	0.00406625	-0.791172
728661	SLC35E2B	0.43392	6.3288	3.8452	0.000494736	0.00406625	-0.791594
65993	MRPS34	-0.30789	7.51577	-3.84491	0.000495155	0.00406662	-0.792408
5293	PIK3CD	1.10001	2.1643	3.84312	0.000497682	0.0040843	-0.797309
1317	SLC31A1	-0.400022	5.55801	-3.84281	0.000498128	0.00408487	-0.798171
56999	ADAMTS9	0.602302	5.61371	3.84185	0.000499491	0.00409297	-0.800802
60677	CELF6	1.77079	0.841573	3.84092	0.000500811	0.00410069	-0.803342
55117	SLC6A15	-0.741871	5.83848	-3.83993	0.000502227	0.00410847	-0.806061
57597	BAHCC1	-0.501452	5.02302	-3.83973	0.000502515	0.00410847	-0.806613
6741	SSB	-0.344478	8.40731	-3.83875	0.000503916	0.00411682	-0.809292
6744	SSFA2	0.750715	4.57712	3.83745	0.000505776	0.00412892	-0.812839
51705	EMCN	1.99683	-0.105874	3.83697	0.000506472	0.0041315	-0.814162
84939	MUM1	0.533269	6.43495	3.83525	0.000508958	0.00414867	-0.818875
11173	ADAMTS7	0.586913	3.59781	3.83474	0.000509697	0.00415159	-0.820274
332	BIRC5	-0.257043	7.8431	-3.8328	0.000512522	0.00417148	-0.825593
25976	TIPARP	0.867314	3.45787	3.83068	0.000515618	0.00419354	-0.831389
51160	VPS28	0.356066	7.17642	3.83039	0.000516046	0.00419388	-0.832187
100506054	RNASEH1-AS1	-0.481745	4.87798	-3.82977	0.000516959	0.00419816	-0.833889
80157	CWH43	-0.599796	4.9455	-3.82951	0.000517343	0.00419816	-0.834604
11019	LIAS	-0.649388	3.16087	-3.82676	0.000521408	0.00422724	-0.842135
545	ATR	-0.626166	4.43452	-3.82656	0.000521704	0.00422724	-0.842682
23225	NUP210	-0.455005	5.74194	-3.82404	0.000525448	0.00425441	-0.849564
4298	MLLT1	0.35862	6.21306	3.82231	0.000528047	0.00427227	-0.854311
8933	FAM127A	0.29689	6.92655	3.81974	0.000531922	0.00430043	-0.861346
7007	TECTA	1.38276	1.64107	3.81796	0.00053462	0.00431903	-0.866214
3021	H3F3B	0.395794	10.3769	3.81728	0.000535646	0.00432411	-0.868059
138050	HGSNAT	0.487121	4.87958	3.81644	0.000536923	0.00433121	-0.870351
7102	TSPAN7	-1.0343	4.70368	-3.81613	0.000537399	0.00433183	-0.871202
10607	TBL3	-0.492821	3.91213	-3.81514	0.000538911	0.00433753	-0.873905
89797	NAV2	-0.590071	4.81024	-3.8151	0.000538976	0.00433753	-0.874022
388228	SBK1	0.41264	6.24945	3.81489	0.000539302	0.00433753	-0.874603
91833	WDR20	-0.473889	4.14009	-3.81408	0.000540538	0.00434426	-0.876805
9612	NCOR2	0.459636	7.35202	3.81366	0.000541184	0.00434625	-0.877955
7536	SF1	0.422317	8.10435	3.81324	0.00054183	0.00434823	-0.879102
4239	MFAP4	2.02081	2.87711	3.81229	0.000543291	0.00435674	-0.881693
5525	PPP2R5A	-0.44105	4.88863	-3.81158	0.000544397	0.0043609	-0.88365
10815	CPLX1	0.993319	4.66297	3.81144	0.000544611	0.0043609	-0.884027
23126	POGZ	0.447514	7.24378	3.81078	0.00054564	0.00436215	-0.885843
644096	SDHAF1	-0.618228	3.81374	-3.81073	0.000545713	0.00436215	-0.885972
23230	VPS13A	-0.654016	4.49158	-3.81056	0.00054597	0.00436215	-0.886425
2113	ETS1	1.09967	2.1774	3.80913	0.000548192	0.00437669	-0.890333
80179	MYO19	-0.517392	3.93966	-3.80679	0.000551846	0.00440263	-0.896723
2739	GLO1	-0.296873	7.85958	-3.80596	0.000553152	0.00440982	-0.898995
23313	KIAA0930	-0.393178	5.39873	-3.80567	0.000553615	0.00441028	-0.8998
54517	PUS7	-0.627158	4.34548	-3.80332	0.000557316	0.00443651	-0.906209
260341	TFAMP1	-1.16383	2.79881	-3.80172	0.000559851	0.00445343	-0.910573
94030	LRRC4B	1.11534	4.11689	3.80127	0.000560573	0.00445592	-0.911814
949	SCARB1	-0.679249	4.94466	-3.80047	0.000561839	0.00446272	-0.913982
94032	CAMK2N2	1.12543	3.3165	3.79934	0.000563647	0.00447382	-0.917072
7357	UGCG	-0.460336	5.5263	-3.79766	0.000566343	0.00449194	-0.921661
9817	KEAP1	0.346479	6.28816	3.79409	0.0005721	0.0045343	-0.931386
160335	TMTC2	0.74813	4.36319	3.79052	0.000577932	0.00457719	-0.941138
57404	CYP20A1	0.409627	5.03691	3.78887	0.000580634	0.00459524	-0.945623
4760	NEUROD1	1.44892	6.18334	3.78826	0.000581644	0.00459989	-0.947294
64965	MRPS9	-0.649221	3.5249	-3.78701	0.000583713	0.0046129	-0.950708
54557	SGTB	-0.717086	2.8023	-3.78593	0.000585493	0.00462361	-0.953636
84668	FAM126A	0.412723	4.44838	3.78558	0.000586089	0.00462496	-0.954613
55280	CWF19L1	-0.505122	4.29186	-3.78097	0.000593782	0.00468023	-0.967149
5530	PPP3CA	0.345137	7.8042	3.78087	0.000593952	0.00468023	-0.967425
84080	ENKD1	-0.555665	4.41198	-3.779	0.000597114	0.00470173	-0.972527
201266	SLC39A11	-0.668424	5.44681	-3.77861	0.00059777	0.00470349	-0.973583
1501	CTNND2	2.09042	2.43632	3.77772	0.000599279	0.00471196	-0.976006
55761	TTC17	0.36619	5.61825	3.77136	0.000610183	0.00479423	-0.993336
25805	BAMBI	0.898283	3.79707	3.76954	0.000613319	0.0048154	-0.998263
11098	PRSS23	1.1644	3.82295	3.76928	0.000613779	0.00481553	-0.998983
103	ADAR	0.272473	8.81745	3.76772	0.00061649	0.00483332	-1.00322
898	CCNE1	0.853217	4.20633	3.76647	0.000618684	0.00484657	-1.00663
10534	SSSCA1	-0.535103	4.23365	-3.76625	0.000619071	0.00484657	-1.00723
84002	B3GNT5	0.59055	3.73916	3.76515	0.000620993	0.00485487	-1.01021
55326	AGPAT5	-0.387299	6.61929	-3.76513	0.000621023	0.00485487	-1.01026
55651	NHP2	-0.35173	7.31299	-3.76388	0.000623237	0.00486868	-1.01368
10762	NUP50	0.467869	6.34188	3.76169	0.0006271	0.00489534	-1.01961
57161	PELI2	-0.43588	5.62493	-3.76049	0.000629229	0.00490844	-1.02287
200030	NBPF11	0.48404	5.81308	3.75973	0.000630584	0.00491348	-1.02494
26022	TMEM98	0.369817	6.38418	3.75963	0.000630779	0.00491348	-1.02523
10267	RAMP1	-0.895873	4.71509	-3.75888	0.000632117	0.00491752	-1.02727
6434	TRA2B	0.394935	8.40618	3.75883	0.000632201	0.00491752	-1.0274
5228	PGF	0.943484	3.59036	3.75691	0.000635642	0.00494076	-1.03261
51441	YTHDF2	0.348035	7.65416	3.75645	0.000636466	0.00494362	-1.03385
29101	SSU72	-0.318973	6.07323	-3.75317	0.000642401	0.00498616	-1.04277
26520	TIMM9	-0.388771	5.86531	-3.75046	0.000647349	0.00502099	-1.05014
55646	LYAR	-0.280726	6.84114	-3.74713	0.000653454	0.00506474	-1.05916
23300	ATMIN	0.375862	5.46743	3.74463	0.000658094	0.00509707	-1.06595
59269	HIVEP3	1.19436	2.4064	3.74255	0.000661967	0.00512206	-1.07159
84842	HPDL	-0.600164	5.0867	-3.74239	0.000662263	0.00512206	-1.07202
1983	EIF5	0.64517	7.88123	3.74085	0.000665165	0.00513878	-1.07621
51171	HSD17B14	-1.05341	2.06397	-3.74074	0.000665369	0.00513878	-1.07651
9497	SLC4A7	-0.587947	6.40317	-3.74031	0.000666167	0.0051413	-1.07766
113655	MFSD3	-0.552806	5.25435	-3.73963	0.000667449	0.00514754	-1.0795
60529	ALX4	1.71416	0.689161	3.739	0.000668637	0.00514951	-1.08121
642366	LOC642366	-0.725421	3.4197	-3.73899	0.000668651	0.00514951	-1.08123
647135	SRGAP2B	-0.485922	6.81571	-3.73867	0.000669269	0.00515062	-1.08212
2736	GLI2	0.700599	4.83787	3.73784	0.000670833	0.00515902	-1.08436
10477	UBE2E3	0.323482	6.33317	3.73714	0.000672154	0.00516552	-1.08625
10966	RAB40B	0.695689	3.76359	3.73612	0.000674106	0.0051723	-1.08904
118924	FRA10AC1	-0.359334	6.67701	-3.73593	0.000674454	0.0051723	-1.08953
5521	PPP2R2B	-1.06615	3.8517	-3.73593	0.000674462	0.0051723	-1.08954
121642	ALKBH2	-0.394967	6.13246	-3.73452	0.000677146	0.00518923	-1.09335
128229	TSACC	-1.41221	2.65205	-3.73263	0.000680777	0.00521338	-1.09849
79804	HAND2-AS1	-0.424223	6.04014	-3.73115	0.000683623	0.0052315	-1.10249
148327	CREB3L4	-0.419631	4.34338	-3.73007	0.000685716	0.00524382	-1.10543
27443	CECR2	-0.637879	5.46778	-3.72928	0.000687249	0.00525186	-1.10757
127700	OSCP1	-0.633851	3.43236	-3.72648	0.00069269	0.00528972	-1.11514
79906	MORN1	0.762502	3.02786	3.72612	0.000693395	0.00529139	-1.11612
29781	NCAPH2	0.505219	5.46443	3.72328	0.000698966	0.00533017	-1.1238
3669	ISG20	-1.16678	2.51238	-3.72278	0.000699951	0.00533373	-1.12515
3149	HMGB3	0.363914	7.49582	3.72255	0.000700414	0.00533373	-1.12578
81608	FIP1L1	0.255474	7.40405	3.72128	0.000702928	0.00534913	-1.12922
64786	TBC1D15	-0.390057	5.43767	-3.7205	0.000704468	0.00535711	-1.13132
79012	CAMKV	-0.910243	4.67121	-3.71901	0.000707428	0.00537586	-1.13535
390940	PINLYP	2.03067	0.958826	3.71852	0.00070841	0.00537956	-1.13668
58517	RBM25	0.422798	9.40954	3.71825	0.000708954	0.00537994	-1.13741
10234	LRRC17	0.990469	3.97543	3.71676	0.000711934	0.00539879	-1.14144
65268	WNK2	0.818844	3.27757	3.71635	0.000712762	0.00540097	-1.14256
201475	RAB12	-0.41525	5.21174	-3.71612	0.000713214	0.00540097	-1.14316
2950	GSTP1	0.249761	10.5656	3.71473	0.00071603	0.00541852	-1.14695
1877	E4F1	0.601592	4.45456	3.71286	0.000719795	0.00544323	-1.15198
9585	KIF20B	-0.414073	7.863	-3.71006	0.000725509	0.00548263	-1.15956
10527	IPO7	-0.229309	7.50912	-3.70939	0.000726868	0.00548909	-1.16136
114569	MAL2	2.93173	1.59491	3.70736	0.000731052	0.00551686	-1.16687
51428	DDX41	-0.441953	5.85854	-3.70623	0.000733364	0.00553047	-1.1699
2077	ERF	0.564507	5.65745	3.70532	0.000735247	0.00554083	-1.17236
7750	ZMYM2	0.286044	6.33414	3.70422	0.000737533	0.00555162	-1.17533
10018	BCL2L11	0.701564	3.9774	3.70401	0.000737979	0.00555162	-1.17591
23607	CD2AP	-0.579794	4.60487	-3.7039	0.000738209	0.00555162	-1.17621
23208	SYT11	0.308274	7.69973	3.70182	0.000742539	0.00558032	-1.18182
57181	SLC39A10	-0.500723	6.5029	-3.70046	0.00074539	0.00559789	-1.1855
22979	EFR3B	0.734504	3.96382	3.69888	0.000748695	0.00561692	-1.18974
123920	CMTM3	0.376026	5.05097	3.69876	0.000748958	0.00561692	-1.19008
131544	CRYBG3	0.901262	4.0471	3.69402	0.000759022	0.00568848	-1.20288
729920	ISPD	-0.887137	2.11698	-3.69279	0.000761641	0.00570419	-1.20618
26255	PTTG3P	-0.829358	3.97106	-3.69159	0.000764206	0.00571946	-1.20941
23566	LPAR3	-0.731087	4.13566	-3.69073	0.000766076	0.00572951	-1.21175
22854	NTNG1	1.39237	2.16235	3.68996	0.000767723	0.00573789	-1.21381
4776	NFATC4	0.494277	6.37281	3.68931	0.000769142	0.00574455	-1.21558
388662	SLC6A17	1.16983	3.22475	3.68874	0.000770366	0.00574974	-1.21711
51073	MRPL4	-0.320711	5.88135	-3.68667	0.000774857	0.0057793	-1.22268
55770	EXOC2	0.511499	4.12123	3.68412	0.000780431	0.00581688	-1.22955
26051	PPP1R16B	-1.64997	1.61522	-3.68295	0.000782999	0.00583203	-1.2327
10721	POLQ	-0.565927	3.42362	-3.68072	0.000787932	0.00586476	-1.23872
38	ACAT1	-0.770715	4.83569	-3.68033	0.000788783	0.00586708	-1.23976
55215	FANCI	-0.400842	5.26215	-3.67838	0.000793114	0.00589526	-1.24501
2289	FKBP5	-0.40633	6.17418	-3.67722	0.000795715	0.00591056	-1.24814
11278	KLF12	0.740356	3.98757	3.67464	0.000801488	0.00594938	-1.25507
57213	SPRYD7	-0.643371	4.35625	-3.6736	0.000803849	0.00596284	-1.25789
131474	CHCHD4	-0.488789	5.37172	-3.67223	0.000806933	0.00598164	-1.26156
401720	FIGNL2	1.52525	2.37248	3.67165	0.000808263	0.00598742	-1.26314
10669	CGREF1	-0.798256	2.8942	-3.67047	0.00081093	0.00600309	-1.2663
10484	SEC23A	0.417905	5.54418	3.66907	0.000814121	0.00602262	-1.27006
30812	SOX8	1.5033	1.80383	3.66868	0.000815009	0.00602509	-1.27111
6892	TAPBP	-0.484414	5.10098	-3.66778	0.000817081	0.0060363	-1.27354
57685	CACHD1	0.677044	3.85093	3.66523	0.000822955	0.00607557	-1.28041
81563	C1orf21	0.407468	5.61513	3.66312	0.000827824	0.00610342	-1.28606
29128	UHRF1	0.515445	6.53432	3.66273	0.000828746	0.00610342	-1.28712
54985	HCFC1R1	-0.515371	5.94549	-3.66267	0.00082887	0.00610342	-1.28727
91860	CALML4	-0.84666	3.31435	-3.66263	0.000828971	0.00610342	-1.28738
80314	EPC1	0.51287	6.4302	3.66016	0.000834736	0.00614171	-1.29402
1429	CRYZ	-0.58268	4.7837	-3.65924	0.000836881	0.00615334	-1.29648
478	ATP1A3	-0.995721	3.68472	-3.6581	0.00083956	0.00616887	-1.29955
57479	PRR12	0.547646	4.49039	3.65657	0.000843175	0.00619125	-1.30366
124790	HEXIM2	-0.503671	3.53109	-3.65607	0.000844352	0.00619571	-1.305
57586	SYT13	2.12875	1.35247	3.65537	0.000846012	0.00620371	-1.30688
100272147	CMC4	-0.630295	3.58098	-3.65465	0.000847728	0.00620959	-1.30882
2002	ELK1	-0.455489	4.58187	-3.65456	0.000847956	0.00620959	-1.30908
4286	MITF	-0.538381	3.47862	-3.65431	0.000848544	0.00620972	-1.30974
1314	COPA	0.24959	8.3196	3.65365	0.000850101	0.00621694	-1.3115
80731	THSD7B	0.619605	4.53812	3.6522	0.000853577	0.00623816	-1.31541
22996	TTC39A	-1.03594	2.78312	-3.65142	0.000855433	0.00624753	-1.31749
2195	FAT1	0.799258	2.83666	3.64899	0.000861277	0.00628599	-1.32401
64946	CENPH	-0.528311	5.76195	-3.64822	0.000863147	0.00629542	-1.32609
10449	ACAA2	-0.379773	6.49123	-3.64783	0.000864093	0.0062981	-1.32714
3672	ITGA1	-0.46194	6.27887	-3.64752	0.000864842	0.00629934	-1.32797
91010	FMNL3	0.604506	3.55281	3.64689	0.000866365	0.00630621	-1.32965
8847	DLEU2	-0.6122	3.71926	-3.64651	0.00086729	0.00630872	-1.33067
3778	KCNMA1	0.764006	4.13117	3.64397	0.000873475	0.00634947	-1.33748
113452	TMEM54	1.38481	1.93063	3.64332	0.000875073	0.00635667	-1.33923
79442	LRRC2	-2.08841	1.21883	-3.64309	0.000875633	0.00635667	-1.33984
51132	RLIM	-0.297602	8.32667	-3.63877	0.000886282	0.00642968	-1.35142
4735	SEPT2	0.279274	7.8966	3.63741	0.000889668	0.00644995	-1.35507
22826	DNAJC8	-0.255657	8.59349	-3.63654	0.000891829	0.0064613	-1.35739
4772	NFATC1	0.83591	3.25376	3.63604	0.000893086	0.00646611	-1.35874
4212	MEIS2	0.446353	6.24147	3.63533	0.000894869	0.00647471	-1.36065
5160	PDHA1	-0.316783	7.29183	-3.63494	0.000895834	0.00647739	-1.36168
26059	ERC2	1.03979	2.39426	3.6345	0.000896942	0.00648109	-1.36286
3632	INPP5A	0.352727	5.67849	3.6337	0.000898938	0.0064912	-1.36499
84245	MRI1	-0.573785	3.88484	-3.63149	0.000904524	0.00652721	-1.37092
284161	GDPD1	-0.562468	4.96018	-3.63088	0.000906061	0.00653396	-1.37255
55062	WIPI1	-0.653039	4.2677	-3.63022	0.000907753	0.00654184	-1.37434
3958	LGALS3	1.10804	2.22948	3.62974	0.000908949	0.00654612	-1.3756
81502	HM13	0.347084	6.27823	3.62913	0.000910521	0.0065531	-1.37725
83482	SCRT1	1.16851	2.99231	3.62863	0.000911784	0.00655371	-1.37858
9294	S1PR2	0.735728	2.99326	3.62862	0.000911809	0.00655371	-1.3786
6723	SRM	-0.415201	7.38826	-3.62669	0.000916749	0.00658486	-1.38378
171019	ADAMTS19	-1.03745	3.7508	-3.62558	0.0009196	0.00659669	-1.38675
4200	ME2	-0.566853	4.74447	-3.62554	0.0009197	0.00659669	-1.38685
117178	SSX2IP	-0.529625	5.33191	-3.62534	0.000920215	0.00659669	-1.38739
5360	PLTP	-0.716681	2.93199	-3.62337	0.000925306	0.00662882	-1.39267
29015	SLC43A3	-1.69931	1.20658	-3.62312	0.000925945	0.00662904	-1.39333
286480	UBE2E4P	0.336814	6.52608	3.62244	0.000927696	0.0066372	-1.39514
84717	HDGFRP2	-0.333815	5.72165	-3.62149	0.000930159	0.00665045	-1.39767
9266	CYTH2	0.407994	5.52402	3.62009	0.000933806	0.00667214	-1.40142
23760	PITPNB	0.383135	7.14846	3.61971	0.000934798	0.00667485	-1.40244
84324	SARNP	-0.486982	5.29428	-3.61867	0.000937537	0.00669002	-1.40524
222008	VSTM2A	-1.04415	3.16368	-3.61679	0.000942448	0.00672066	-1.41024
113402	SFT2D1	-0.498317	4.172	-3.61619	0.000944052	0.00672768	-1.41186
1005	CDH7	1.25845	3.27682	3.61295	0.00095263	0.00678437	-1.42052
7259	TSPYL1	0.346836	6.12044	3.61212	0.000954819	0.00679552	-1.42271
100507217	LINC01578	0.416342	6.86262	3.61169	0.00095598	0.00679556	-1.42388
10899	JTB	-0.235882	8.80581	-3.61152	0.000956425	0.00679556	-1.42432
341056	LOC341056	-0.952942	2.68124	-3.61142	0.000956699	0.00679556	-1.42459
379025	PSMA3-AS1	0.644417	4.19704	3.61073	0.000958557	0.00680432	-1.42645
1802	DPH2	-0.430423	5.42648	-3.60929	0.000962396	0.00682712	-1.43028
27327	TNRC6A	0.447416	7.3951	3.6074	0.000967502	0.00685886	-1.43534
4897	NRCAM	-0.61779	3.6242	-3.60676	0.000969218	0.00686655	-1.43703
158160	HSD17B7P2	-0.814761	2.94621	-3.60547	0.000972713	0.00688683	-1.44048
6750	SST	2.60567	-0.714869	3.60492	0.000974225	0.00689305	-1.44196
23240	KIAA0922	0.471833	5.1464	3.60428	0.000975956	0.00690082	-1.44366
8731	RNMT	-0.466633	6.08034	-3.60348	0.000978123	0.00691165	-1.44578
54738	FEV	-0.680391	4.15393	-3.60119	0.000984405	0.00695152	-1.45191
7702	ZNF143	-0.479381	3.94632	-3.60059	0.000986055	0.00695866	-1.45351
1613	DAPK3	0.714287	4.23993	3.59989	0.00098797	0.00696227	-1.45536
25778	DSTYK	0.336885	5.77234	3.59977	0.00098831	0.00696227	-1.45569
642477	LINC01296	0.469767	4.49111	3.59971	0.000988486	0.00696227	-1.45586
7343	UBTF	0.386046	6.9373	3.59821	0.00099261	0.00698679	-1.45984
34	ACADM	-0.337589	6.21502	-3.59751	0.000994569	0.00699606	-1.46173
55521	TRIM36	1.31911	2.87492	3.59702	0.000995905	0.00700093	-1.46301
79828	METTL8	-0.483568	4.37707	-3.59318	0.00100662	0.00707172	-1.47325
55585	UBE2Q1	0.265488	8.16166	3.59282	0.00100763	0.00707422	-1.47421
3612	IMPA1	-0.515688	5.2074	-3.59169	0.00101083	0.00709208	-1.47724
23556	PIGN	-0.732209	2.8732	-3.59079	0.00101336	0.00710529	-1.47963
9024	BRSK2	0.534844	4.41839	3.58938	0.00101735	0.00712866	-1.48339
5170	PDPK1	0.386425	6.43394	3.588	0.00102127	0.00715149	-1.48706
4858	NOVA2	0.859697	4.4991	3.5873	0.00102327	0.00716091	-1.48893
9518	GDF15	-2.73251	3.19656	-3.58681	0.00102466	0.007166	-1.49023
5523	PPP2R3A	0.599228	3.38083	3.58649	0.00102556	0.00716772	-1.49107
54965	PIGX	-0.398138	5.79702	-3.58613	0.0010266	0.00717036	-1.49204
203859	ANO5	-1.03854	2.16715	-3.58579	0.00102757	0.00717252	-1.49294
27145	FILIP1	1.22601	1.9019	3.5852	0.00102927	0.0071798	-1.49452
84283	TMEM79	-0.51139	4.5638	-3.584	0.00103271	0.00719917	-1.49771
94015	TTYH2	-0.628495	2.7263	-3.581	0.00104136	0.00725487	-1.50569
59343	SENP2	-0.398975	5.33254	-3.5785	0.00104864	0.0073009	-1.51235
23592	LEMD3	0.518969	4.65037	3.57639	0.00105482	0.00733478	-1.51796
8545	CGGBP1	0.428438	6.23705	3.57638	0.00105485	0.00733478	-1.51799
27075	TSPAN13	0.455197	5.33359	3.57471	0.00105976	0.00736392	-1.52243
151903	CCDC12	-0.371195	5.07654	-3.57449	0.0010604	0.00736392	-1.523
57335	ZNF286A	-0.927316	2.91675	-3.57387	0.00106224	0.00737197	-1.52466
80312	TET1	-0.776547	4.811	-3.56798	0.00107977	0.00748777	-1.5403
54809	SAMD9	1.77717	0.821088	3.56781	0.0010803	0.00748777	-1.54077
11124	FAF1	-0.365291	7.09619	-3.56601	0.0010857	0.00751687	-1.54554
3643	INSR	0.31829	5.39202	3.56595	0.00108588	0.00751687	-1.54569
140688	NOL4L	0.494728	4.84857	3.56383	0.00109232	0.00755663	-1.55134
3178	HNRNPA1	0.444466	9.24939	3.56312	0.00109445	0.00756659	-1.55321
5888	RAD51	-0.423172	5.01933	-3.56278	0.00109548	0.00756891	-1.55411
7706	TRIM25	0.406913	6.33137	3.55827	0.00110931	0.00765956	-1.56609
9698	PUM1	0.234896	7.35638	3.55777	0.00111085	0.0076625	-1.56742
23175	LPIN1	-0.392525	6.31581	-3.55768	0.00111114	0.0076625	-1.56767
51720	UIMC1	-0.458584	5.08905	-3.55732	0.00111225	0.0076653	-1.56862
646214	LOC646214	-0.529778	5.14642	-3.55679	0.00111386	0.00767156	-1.57
92104	TTC30A	0.698965	4.09341	3.55528	0.00111855	0.00769893	-1.57401
440423	SUZ12P1	-0.607888	3.87601	-3.55431	0.00112158	0.00771491	-1.5766
9902	MRC2	0.64064	5.20919	3.55376	0.00112328	0.00772176	-1.57805
8805	TRIM24	0.355	5.9558	3.55188	0.00112916	0.00775286	-1.58303
9583	ENTPD4	0.387613	4.44598	3.55186	0.00112923	0.00775286	-1.58309
2821	GPI	-0.614073	9.08842	-3.55111	0.00113159	0.00776413	-1.58508
79745	CLIP4	-0.613118	3.38657	-3.54871	0.00113913	0.00781096	-1.59143
56034	PDGFC	0.825414	3.96641	3.54754	0.00114286	0.00782736	-1.59455
79642	ARSJ	1.13773	2.64854	3.5475	0.00114296	0.00782736	-1.59463
54065	SMIM11A	-0.601602	3.63742	-3.54728	0.00114368	0.00782736	-1.59523
51081	MRPS7	-0.409478	5.52842	-3.54653	0.00114606	0.00783872	-1.59722
10505	SEMA4F	0.506042	3.27527	3.54329	0.00115641	0.00790455	-1.6058
2931	GSK3A	0.33816	5.52416	3.54255	0.00115876	0.00791565	-1.60774
54915	YTHDF1	0.440577	6.27644	3.54229	0.0011596	0.00791643	-1.60844
55759	WDR12	-0.381807	5.60754	-3.54176	0.00116133	0.00792325	-1.60986
10795	ZNF268	0.503971	4.39168	3.54016	0.00116648	0.00795339	-1.61408
144717	FAM109A	0.866069	3.02156	3.53966	0.00116809	0.00795941	-1.6154
6196	RPS6KA2	-0.649472	5.61784	-3.53613	0.00117959	0.00803271	-1.62475
8140	SLC7A5	-1.19734	5.78887	-3.53336	0.00118867	0.00808949	-1.63207
5129	CDK18	1.03054	2.79789	3.53257	0.00119129	0.00810224	-1.63417
3927	LASP1	0.37165	6.81706	3.53116	0.00119593	0.00812873	-1.63788
9066	SYT7	0.792942	3.39065	3.5306	0.00119778	0.00813622	-1.63936
22824	HSPA4L	-0.694403	4.58447	-3.53032	0.00119871	0.00813745	-1.6401
10417	SPON2	2.07166	1.52594	3.52992	0.00120004	0.00814143	-1.64116
1329	COX5B	-0.262294	8.26972	-3.52951	0.00120142	0.00814573	-1.64226
63035	BCORL1	0.534489	4.39875	3.52802	0.00120638	0.00817421	-1.64618
6653	SORL1	0.764878	3.4942	3.5277	0.00120746	0.00817645	-1.64704
1017	CDK2	0.263946	6.88982	3.52644	0.00121166	0.00819978	-1.65035
5977	DPF2	0.27596	6.06938	3.52499	0.00121656	0.00822784	-1.6542
4267	CD99	0.437095	5.98287	3.52392	0.00122015	0.00824278	-1.65701
79698	ZMAT4	-0.654192	4.20108	-3.52388	0.00122028	0.00824278	-1.65712
10052	GJC1	0.452348	6.75333	3.52237	0.00122539	0.00826757	-1.66111
945	CD33	2.01674	-1.297	3.52235	0.00122547	0.00826757	-1.66117
7072	TIA1	0.418605	6.13651	3.52108	0.00122976	0.00829138	-1.66451
5291	PIK3CB	-0.587599	3.33515	-3.52012	0.00123306	0.00830844	-1.66706
55573	CDV3	-0.273514	6.96551	-3.51939	0.00123554	0.00832001	-1.66898
23049	SMG1	-0.546765	4.92253	-3.51708	0.00124347	0.00836821	-1.67508
84986	ARHGAP19	-0.37952	4.30192	-3.51684	0.00124427	0.00836847	-1.6757
130074	FAM168B	0.345535	6.75118	3.51648	0.00124553	0.00837175	-1.67666
56940	DUSP22	0.91147	3.51243	3.51567	0.00124833	0.0083852	-1.6788
8675	STX16	-0.413543	5.58838	-3.51545	0.00124907	0.0083852	-1.67937
222962	SLC29A4	0.727698	4.6246	3.51502	0.00125057	0.00838807	-1.68051
25865	PRKD2	-0.406594	4.47837	-3.51469	0.00125171	0.00838807	-1.68138
378706	RN7SL2	-0.712909	4.47014	-3.51466	0.00125181	0.00838807	-1.68146
9690	UBE3C	-0.38974	5.57814	-3.51371	0.0012551	0.00840492	-1.68396
64333	ARHGAP9	2.60791	1.09772	3.51276	0.0012584	0.00841718	-1.68646
377	ARF3	0.286881	7.35467	3.51274	0.00125848	0.00841718	-1.68653
6773	STAT2	0.610863	5.04552	3.51118	0.0012639	0.00844826	-1.69063
8660	IRS2	0.579383	6.0838	3.5109	0.0012649	0.00844973	-1.69138
64855	FAM129B	0.549854	4.8361	3.50985	0.00126856	0.00846899	-1.69414
4191	MDH2	-0.261911	7.91852	-3.50943	0.00127006	0.00847381	-1.69526
23109	DDN	-1.09144	2.63258	-3.50843	0.00127355	0.00849191	-1.69788
26122	EPC2	0.447663	5.64963	3.50767	0.00127624	0.00850459	-1.69989
2820	GPD2	-0.464654	4.74133	-3.50735	0.00127735	0.00850683	-1.70073
10550	ARL6IP5	-0.397445	7.23244	-3.50614	0.00128165	0.00853024	-1.70393
55972	SLC25A40	-0.641104	3.11178	-3.50584	0.0012827	0.008532	-1.70471
9647	PPM1F	0.3915	4.69583	3.50452	0.00128738	0.00855238	-1.70818
79064	TMEM223	-0.437639	4.66511	-3.50442	0.00128777	0.00855238	-1.70847
6794	STK11	0.417616	5.49917	3.50414	0.00128873	0.00855238	-1.70918
5253	PHF2	0.43063	5.46723	3.50409	0.00128893	0.00855238	-1.70933
23148	NACAD	1.02572	3.30287	3.50387	0.00128969	0.00855238	-1.7099
200933	FBXO45	-0.27569	6.63746	-3.50364	0.00129051	0.00855258	-1.7105
64147	KIF9	-0.527185	3.93349	-3.50174	0.00129731	0.00858454	-1.71551
84159	ARID5B	0.934569	3.14989	3.50169	0.00129751	0.00858454	-1.71566
4809	SNU13	-0.226777	8.42953	-3.50163	0.0012977	0.00858454	-1.7158
3074	HEXB	-0.464161	4.76183	-3.50125	0.00129906	0.00858832	-1.7168
23244	PDS5A	-0.300859	6.69261	-3.50064	0.00130126	0.00859767	-1.71841
100874032	PRRT3-AS1	-0.995178	1.92234	-3.49919	0.00130647	0.00862684	-1.72222
5036	PA2G4	-0.272332	9.80211	-3.49895	0.00130735	0.0086274	-1.72286
10213	PSMD14	-0.272428	7.74652	-3.4967	0.00131549	0.00867337	-1.72878
23542	MAPK8IP2	0.708933	4.40001	3.49659	0.00131591	0.00867337	-1.72908
58158	NEUROD4	1.86174	2.46902	3.49615	0.00131748	0.00867844	-1.73022
3029	HAGH	-0.360557	6.24476	-3.49592	0.00131834	0.0086789	-1.73085
57522	SRGAP1	0.514442	4.24579	3.49531	0.00132055	0.00868819	-1.73244
6608	SMO	0.575301	3.92726	3.49388	0.00132578	0.00871731	-1.73621
27112	FAM155B	0.701944	3.33053	3.49279	0.00132976	0.00873822	-1.73907
56953	NT5M	-0.861936	2.8178	-3.49163	0.00133403	0.00876095	-1.74212
25940	FAM98A	-0.405102	6.28552	-3.49078	0.00133717	0.00877631	-1.74437
11142	PKIG	0.406165	4.42585	3.49028	0.00133899	0.00878296	-1.74566
567	B2M	0.394868	9.80392	3.48766	0.0013487	0.00884132	-1.75255
23549	DNPEP	-0.502533	5.67886	-3.48581	0.00135563	0.00888139	-1.75743
2184	FAH	-0.588385	3.94613	-3.48541	0.00135711	0.0088846	-1.75847
54947	LPCAT2	-0.88472	2.71734	-3.48524	0.00135775	0.0088846	-1.75892
5962	RDX	0.371495	7.88176	3.48424	0.00136151	0.00890383	-1.76156
23024	PDZRN3	0.785602	4.7602	3.48325	0.00136521	0.00892264	-1.76414
6431	SRSF6	0.545192	7.76448	3.48261	0.00136763	0.00893312	-1.76583
1657	DMXL1	-0.49227	3.85231	-3.4814	0.0013722	0.00895757	-1.76901
2584	GALK1	-0.64202	4.00982	-3.47831	0.00138392	0.00902864	-1.77711
100419583	LOC100419583	-0.54712	3.98456	-3.47774	0.0013861	0.00903747	-1.77861
2935	GSPT1	-0.239561	8.16309	-3.47607	0.00139248	0.00907109	-1.78299
2649	NR6A1	-0.704012	3.95881	-3.47596	0.00139292	0.00907109	-1.78329
85015	USP45	-0.487994	3.62616	-3.47539	0.00139512	0.00907997	-1.7848
55705	IPO9	0.249678	8.55369	3.473	0.00140431	0.00913434	-1.79105
23560	GTPBP4	-0.253669	7.45327	-3.47255	0.00140605	0.00914017	-1.79223
128272	ARHGEF19	0.703701	3.20653	3.47115	0.00141147	0.00916992	-1.7959
9962	SLC23A2	-0.44099	4.00574	-3.47	0.00141596	0.00918885	-1.79892
6015	RING1	0.549675	3.99994	3.46982	0.00141667	0.00918885	-1.7994
3936	LCP1	-0.882103	4.66456	-3.46976	0.00141692	0.00918885	-1.79956
83541	FAM110A	-0.484132	4.92253	-3.46933	0.00141857	0.00919411	-1.80068
1804	DPP6	0.55154	4.93611	3.46801	0.00142374	0.00922209	-1.80414
901	CCNG2	0.752913	4.36575	3.46748	0.0014258	0.00922994	-1.80552
8833	GMPS	-0.386879	6.06407	-3.46672	0.00142879	0.00924378	-1.80751
6733	SRPK2	0.250525	6.29627	3.46605	0.00143144	0.00925544	-1.80928
7551	ZNF3	0.382509	5.60607	3.46499	0.00143562	0.00927695	-1.81205
55273	TMEM100	2.23942	1.67724	3.46382	0.00144026	0.00930141	-1.81513
55653	BCAS4	-0.736192	3.05088	-3.46341	0.00144186	0.00930626	-1.81619
1909	EDNRA	1.12092	3.07713	3.46193	0.00144774	0.00933867	-1.82006
2561	GABRB2	1.72119	1.79178	3.45829	0.00146233	0.0094272	-1.82961
83943	IMMP2L	-0.664818	3.07292	-3.45801	0.00146345	0.00942884	-1.83034
79675	FASTKD1	-0.309505	5.58869	-3.45753	0.00146538	0.00943568	-1.8316
23576	DDAH1	0.473408	4.9098	3.45708	0.00146717	0.00944161	-1.83276
100131244	ANKRD63	1.76162	0.434795	3.45614	0.001471	0.00946067	-1.83524
7020	TFAP2A	0.95291	3.12331	3.45516	0.00147493	0.00948035	-1.83778
5710	PSMD4	0.230561	9.45357	3.45494	0.00147585	0.00948064	-1.83837
4664	NAB1	0.361583	4.88464	3.45465	0.00147703	0.00948263	-1.83914
4900	NRGN	0.789067	3.91461	3.45414	0.0014791	0.00949032	-1.84047
28973	MRPS18B	-0.448191	4.96589	-3.45344	0.00148194	0.00949879	-1.8423
4170	MCL1	0.415603	9.12542	3.45338	0.00148217	0.00949879	-1.84244
4345	CD200	1.68857	1.33923	3.45186	0.0014884	0.00953313	-1.84644
10856	RUVBL2	-0.279593	6.51775	-3.45141	0.00149021	0.00953429	-1.84759
124512	METTL23	-0.477495	4.9546	-3.45138	0.00149034	0.00953429	-1.84767
501	ALDH7A1	0.305212	6.8777	3.44945	0.00149826	0.00957938	-1.85272
55632	G2E3	-0.331337	6.29073	-3.44869	0.00150141	0.0095883	-1.85472
84172	POLR1B	-0.395877	5.63964	-3.44856	0.00150192	0.0095883	-1.85505
93487	MAPK1IP1L	0.323508	6.70188	3.44838	0.00150267	0.0095883	-1.85552
79728	PALB2	-0.572783	4.04246	-3.44826	0.00150318	0.0095883	-1.85585
55251	PCMTD2	0.469985	5.44082	3.44528	0.00151555	0.00966151	-1.86364
7428	VHL	0.316352	6.40792	3.44353	0.00152281	0.0097019	-1.86819
90246	LOC90246	1.33374	1.70662	3.44333	0.00152367	0.0097019	-1.86873
3232	HOXD3	-0.681528	3.39977	-3.44272	0.0015262	0.00971234	-1.87031
23020	SNRNP200	0.214088	8.089	3.43955	0.00153955	0.00979157	-1.8786
9848	MFAP3L	1.07812	1.74897	3.43928	0.00154067	0.00979297	-1.87929
23443	SLC35A3	-0.598462	3.52559	-3.4388	0.00154274	0.00979854	-1.88057
10000	AKT3	-0.470218	4.53289	-3.43857	0.00154369	0.00979854	-1.88116
55343	SLC35C1	-0.705305	3.27784	-3.43844	0.00154425	0.00979854	-1.8815
25771	TBC1D22A	-0.396404	5.07532	-3.43698	0.00155046	0.00983224	-1.88532
56829	ZC3HAV1	-0.568343	6.07306	-3.43647	0.00155263	0.00984025	-1.88665
5820	PVT1	-0.706965	2.95786	-3.43536	0.00155736	0.00986447	-1.88954
84247	LDOC1L	0.313609	6.11397	3.43502	0.00155879	0.00986783	-1.89042
80347	COASY	-0.318403	6.22066	-3.43441	0.00156142	0.00987873	-1.89202
10424	PGRMC2	-0.272176	7.35499	-3.43367	0.00156458	0.00989297	-1.89395
55421	NCBP3	0.334147	5.87112	3.43328	0.00156627	0.00989791	-1.89497
7402	UTRN	0.659724	3.647	3.43271	0.00156869	0.0099074	-1.89644
4683	NBN	0.347292	6.00851	3.43154	0.00157374	0.00993356	-1.8995
6648	SOD2	-0.398516	5.70852	-3.43082	0.00157683	0.0099473	-1.90137
100132074	FOXO6	0.693953	4.6027	3.42998	0.00158049	0.00996457	-1.90357
1466	CSRP2	0.453582	5.7325	3.42974	0.00158151	0.00996523	-1.90418
5872	RAB13	0.290282	7.40509	3.42865	0.00158624	0.0099893	-1.90703
493812	HCG11	1.36609	0.287347	3.42574	0.00159895	0.01006	-1.91461
22863	ATG14	-0.450764	4.69858	-3.42566	0.00159932	0.01006	-1.91483
54014	BRWD1	-0.396933	5.8834	-3.42517	0.00160145	0.0100676	-1.9161
4976	OPA1	-0.295729	6.3174	-3.42345	0.00160904	0.0101095	-1.9206
6449	SGTA	0.729067	6.18411	3.4214	0.00161806	0.0101572	-1.92592
100289678	ZNF783	0.737118	3.39791	3.4213	0.0016185	0.0101572	-1.92617
81853	TMEM14B	-0.307359	6.30982	-3.42108	0.0016195	0.0101576	-1.92676
10455	ECI2	-0.417055	5.31024	-3.42072	0.0016211	0.0101618	-1.9277
4860	PNP	-0.370748	5.75631	-3.42	0.00162428	0.0101758	-1.92956
24139	EML2	-0.768082	5.17567	-3.41965	0.00162587	0.0101771	-1.93049
6489	ST8SIA1	1.16532	2.21124	3.41954	0.00162636	0.0101771	-1.93078
29927	SEC61A1	0.395596	6.05808	3.41848	0.00163106	0.0102007	-1.93352
10109	ARPC2	-0.208667	8.47788	-3.41816	0.00163247	0.0102037	-1.93435
121260	SLC15A4	-0.463779	4.04087	-3.41543	0.00164474	0.0102745	-1.94147
7918	GPANK1	-0.52426	3.79191	-3.41502	0.00164659	0.0102801	-1.94254
159013	CXorf38	-0.766113	3.54766	-3.41441	0.00164932	0.0102912	-1.94411
79621	RNASEH2B	-0.480267	6.18674	-3.41373	0.00165242	0.0103046	-1.9459
30968	STOML2	-0.300519	7.67863	-3.41286	0.00165633	0.0103231	-1.94815
442213	PTCHD4	-1.28276	1.87654	-3.41248	0.00165806	0.010328	-1.94914
3340	NDST1	0.382788	6.91133	3.41198	0.00166032	0.0103362	-1.95043
23243	ANKRD28	-0.383847	4.5232	-3.41142	0.00166287	0.0103441	-1.9519
55036	CCDC40	0.715212	2.68533	3.41128	0.0016635	0.0103441	-1.95225
9498	SLC4A8	0.663924	5.3277	3.4104	0.00166753	0.0103633	-1.95455
64863	METTL4	-0.806457	2.54301	-3.41004	0.00166916	0.0103675	-1.95548
81887	LAS1L	-0.279958	5.68148	-3.4097	0.0016707	0.010368	-1.95636
23654	PLXNB2	0.449072	5.5754	3.40961	0.00167115	0.010368	-1.95662
9231	DLG5	0.460641	4.30342	3.40692	0.00168347	0.0104385	-1.9636
8702	B4GALT4	-0.596993	3.53178	-3.40611	0.00168721	0.0104557	-1.96571
91574	C12orf65	-0.345956	6.13625	-3.4058	0.00168861	0.0104584	-1.9665
116143	WDR92	-0.469198	4.68563	-3.40546	0.00169019	0.0104623	-1.96738
56259	CTNNBL1	-0.25847	6.62834	-3.40422	0.00169593	0.0104918	-1.97061
89958	SAPCD2	-0.398755	6.66978	-3.40339	0.0016998	0.0105098	-1.97277
728609	SDHAP3	-0.402115	5.50888	-3.40235	0.00170461	0.0105336	-1.97546
230	ALDOC	-1.20758	5.34032	-3.40191	0.0017067	0.0105405	-1.97662
51013	EXOSC1	-0.330417	5.66498	-3.40154	0.0017084	0.010545	-1.97757
85014	TMEM141	-0.469359	4.9598	-3.40107	0.00171059	0.0105525	-1.97879
54785	BORCS6	-0.497905	4.50108	-3.40055	0.00171305	0.0105617	-1.98015
26094	DCAF4	-0.496136	5.17869	-3.39862	0.00172209	0.0106114	-1.98515
51585	PCF11	0.340108	6.58945	3.39801	0.00172495	0.010623	-1.98673
64431	ACTR6	-0.420286	4.96268	-3.39762	0.00172679	0.0106284	-1.98775
415116	PIM3	-0.363638	7.36081	-3.39714	0.00172905	0.0106363	-1.98899
54463	FAM134B	-0.598445	4.31946	-3.39219	0.00175261	0.0107707	-2.00185
9657	IQCB1	-0.646801	3.88078	-3.39213	0.00175289	0.0107707	-2.002
6631	SNRPC	-0.235063	8.10791	-3.39184	0.00175428	0.0107732	-2.00275
51586	MED15	0.317747	5.55732	3.39052	0.00176058	0.0108058	-2.00616
6119	RPA3	-0.323066	6.14529	-3.38979	0.00176411	0.0108214	-2.00806
28972	SPCS1	-0.32637	5.95721	-3.38955	0.00176526	0.0108223	-2.00868
92703	TMEM183A	-0.30733	5.40732	-3.38928	0.00176658	0.0108243	-2.00939
64089	SNX16	-0.65476	2.74092	-3.38614	0.00178177	0.0109112	-2.01753
4190	MDH1	-0.251815	7.95359	-3.3859	0.00178291	0.0109121	-2.01814
3049	HBQ1	-1.46748	2.17708	-3.38546	0.00178507	0.0109138	-2.01928
9060	PAPSS2	0.975731	2.33901	3.38543	0.0017852	0.0109138	-2.01935
23512	SUZ12	-0.24478	6.84029	-3.38454	0.00178953	0.0109341	-2.02165
80224	NUBPL	-0.497119	4.83529	-3.38215	0.00180124	0.0109995	-2.02785
10425	ARIH2	-0.265961	6.87456	-3.38125	0.00180569	0.0110172	-2.03019
9793	CKAP5	-0.335454	7.12826	-3.38115	0.00180616	0.0110172	-2.03044
729178	STXBP5-AS1	2.55656	0.0169407	3.38048	0.00180948	0.0110312	-2.03218
7453	WARS	-0.418878	8.34113	-3.37929	0.00181537	0.0110605	-2.03527
9640	ZNF592	0.548585	5.20151	3.37909	0.00181632	0.0110605	-2.03577
5034	P4HB	0.213026	7.85179	3.37848	0.00181936	0.0110729	-2.03735
129607	CMPK2	1.09575	2.085	3.37642	0.00182962	0.0111291	-2.0427
22859	ADGRL1	0.286152	7.24454	3.3759	0.0018322	0.0111386	-2.04403
84261	FBXW9	-0.586082	4.00263	-3.37436	0.00183988	0.011179	-2.048
114799	ESCO1	-0.500519	4.97231	-3.37332	0.00184515	0.0112047	-2.05072
4852	NPY	1.48779	1.47808	3.37254	0.00184905	0.0112165	-2.05272
339287	MSL1	0.262513	6.74592	3.37252	0.00184915	0.0112165	-2.05278
8825	LIN7A	-0.531433	4.10255	-3.37206	0.00185146	0.0112243	-2.05396
53	ACP2	0.366699	5.3201	3.37102	0.00185673	0.01125	-2.05666
10336	PCGF3	0.341163	6.16409	3.37078	0.00185793	0.011251	-2.05727
286128	ZFP41	0.58061	4.13064	3.37042	0.00185975	0.0112557	-2.0582
27163	NAAA	-0.518862	3.59524	-3.36913	0.00186627	0.0112852	-2.06153
577	ADGRB3	-0.767383	3.24017	-3.36905	0.0018667	0.0112852	-2.06174
4086	SMAD1	0.472394	4.7732	3.3655	0.00188485	0.0113886	-2.07093
23564	DDAH2	0.540431	4.15926	3.36485	0.00188819	0.0114025	-2.07261
3685	ITGAV	0.441015	4.55536	3.36445	0.00189023	0.0114085	-2.07364
55664	CDC37L1	-0.43607	3.84141	-3.36253	0.00190012	0.0114612	-2.07859
2932	GSK3B	0.242608	6.50082	3.36235	0.00190107	0.0114612	-2.07906
8655	DYNLL1	0.368795	8.69539	3.36153	0.00190531	0.0114804	-2.08118
65008	MRPL1	0.409426	6.66362	3.36124	0.00190678	0.0114829	-2.08191
79982	DNAJB14	-0.357828	5.00403	-3.36058	0.00191022	0.0114973	-2.08362
116447	TOP1MT	-0.510653	4.2016	-3.35981	0.00191425	0.0115151	-2.08562
55638	SYBU	1.89257	2.73919	3.35855	0.00192081	0.0115436	-2.08887
51184	GPN3	-0.51272	5.20361	-3.35838	0.00192169	0.0115436	-2.0893
402	ARL2	-0.365126	5.92873	-3.35829	0.00192216	0.0115436	-2.08953
6045	RNF2	0.33202	5.02194	3.3573	0.00192732	0.0115682	-2.09208
123263	MTFMT	-0.375014	4.85311	-3.35705	0.00192864	0.0115697	-2.09273
80169	CTC1	-0.710191	2.79632	-3.35678	0.00193005	0.0115718	-2.09342
8934	RAB29	-0.372871	5.70569	-3.35424	0.00194342	0.0116456	-2.09997
90135	BTBD6	0.402429	4.93044	3.35308	0.0019496	0.0116761	-2.10298
399818	METTL10	-0.523421	4.06218	-3.35281	0.00195098	0.011678	-2.10366
57648	KIAA1522	0.927012	2.38852	3.34892	0.00197175	0.0117958	-2.1137
5899	RALB	0.403028	5.11959	3.34734	0.0019802	0.0118353	-2.11776
51759	C9orf78	-0.270293	6.39592	-3.34728	0.00198052	0.0118353	-2.11791
26133	TRPC4AP	0.383037	5.36017	3.34681	0.00198305	0.0118439	-2.11912
7572	ZNF24	0.26354	7.47863	3.34511	0.00199223	0.0118922	-2.12351
79692	ZNF322	0.407609	4.10744	3.34402	0.00199812	0.0119208	-2.12631
10451	VAV3	1.32761	2.59765	3.34371	0.00199984	0.0119245	-2.12712
79960	JADE1	-0.398521	5.65388	-3.34308	0.00200322	0.0119381	-2.12872
26502	NARF	0.416671	5.60475	3.34273	0.00200516	0.0119384	-2.12964
10884	MRPS30	-0.35734	5.81861	-3.34267	0.00200545	0.0119384	-2.12978
5966	REL	-0.511123	4.16595	-3.33945	0.00202306	0.0120355	-2.13807
64744	SMAP2	-0.383052	5.39296	-3.33892	0.00202601	0.0120355	-2.13945
4285	MIPEP	-0.44417	4.00675	-3.33891	0.00202606	0.0120355	-2.13948
57593	EBF4	0.605022	3.01336	3.33888	0.00202619	0.0120355	-2.13954
23420	NOMO1	-0.640675	3.45112	-3.33715	0.00203572	0.0120855	-2.14399
4249	MGAT5	-0.395607	5.88753	-3.33423	0.00205195	0.0121752	-2.15152
3300	DNAJB2	0.573348	3.91077	3.33099	0.00207004	0.0122759	-2.15984
5566	PRKACA	0.273702	5.95016	3.33051	0.00207274	0.0122852	-2.16107
11018	TMED1	-0.405647	5.00932	-3.32961	0.00207778	0.0123083	-2.16337
5165	PDK3	-0.523445	4.05687	-3.32888	0.00208191	0.0123251	-2.16526
238	ALK	1.0764	2.72483	3.32871	0.00208288	0.0123251	-2.1657
10294	DNAJA2	-0.272164	6.63051	-3.32725	0.00209113	0.0123672	-2.16945
440567	UQCRHL	-0.592459	6.5339	-3.32542	0.00210152	0.0124202	-2.17414
51111	KMT5B	0.280972	6.40267	3.32508	0.00210346	0.0124202	-2.17502
3418	IDH2	0.262678	7.54214	3.32507	0.00210351	0.0124202	-2.17504
90271	OLMALINC	-0.689486	3.86518	-3.32417	0.00210865	0.0124438	-2.17735
10606	PAICS	-0.377512	8.18687	-3.32348	0.0021126	0.0124603	-2.17913
84934	RITA1	-0.472689	4.8885	-3.32189	0.0021217	0.0125019	-2.1832
199731	CADM4	0.867202	3.59359	3.32185	0.00212194	0.0125019	-2.18331
10691	GMEB1	-0.432031	4.13762	-3.32133	0.0021249	0.0125125	-2.18463
116138	KLHDC3	-0.284496	6.56885	-3.32112	0.00212611	0.0125129	-2.18517
92344	GORAB	0.64892	3.63629	3.32046	0.00212993	0.0125286	-2.18687
4361	MRE11A	-0.360947	5.74364	-3.31909	0.00213785	0.0125639	-2.19039
3098	HK1	-0.368771	6.55865	-3.31902	0.00213824	0.0125639	-2.19056
25886	POC1A	-0.479893	4.62601	-3.31822	0.00214286	0.0125842	-2.19261
5646	PRSS3	-1.5022	1.97596	-3.31724	0.00214857	0.012611	-2.19513
10945	KDELR1	0.261675	9.67599	3.3169	0.00215056	0.0126158	-2.19601
3176	HNMT	1.90064	1.67268	3.31563	0.00215797	0.0126494	-2.19927
9493	KIF23	-0.354053	5.5748	-3.31552	0.00215861	0.0126494	-2.19955
5994	RFXAP	-0.468836	4.13959	-3.31414	0.00216667	0.0126899	-2.20308
55247	NEIL3	-0.650757	3.36207	-3.31378	0.00216879	0.0126954	-2.20401
7139	TNNT2	-1.60078	2.42838	-3.31305	0.00217307	0.0127136	-2.20587
79590	MRPL24	-0.325752	7.61442	-3.31149	0.00218226	0.0127605	-2.20987
27235	COQ2	-0.362994	5.17243	-3.31099	0.0021852	0.0127708	-2.21114
2767	GNA11	0.286256	6.68005	3.31057	0.00218767	0.0127785	-2.21222
105374378	LOC105374378	-2.41327	0.270919	-3.30832	0.00220103	0.0128496	-2.21798
6651	SON	0.319722	9.29533	3.30788	0.00220364	0.0128579	-2.21911
54849	DEF8	-0.404839	4.90769	-3.30691	0.00220941	0.0128847	-2.22158
79628	SH3TC2	-1.8986	-0.413385	-3.30619	0.00221372	0.0129029	-2.22343
25932	CLIC4	-0.636432	6.30707	-3.30578	0.00221622	0.0129106	-2.2245
4300	MLLT3	0.458976	4.81261	3.30262	0.00223518	0.0130087	-2.23257
10905	MAN1A2	0.256989	9.26139	3.30258	0.00223546	0.0130087	-2.23268
140606	SELENOM	-0.803667	2.36573	-3.30137	0.00224276	0.0130442	-2.23577
8289	ARID1A	0.360189	7.02897	3.3008	0.00224619	0.0130572	-2.23722
84570	COL25A1	0.7144	2.63294	3.30021	0.00224982	0.0130713	-2.23875
113115	MTFR2	-0.797361	2.95063	-3.29977	0.00225246	0.0130796	-2.23986
162073	ITPRIPL2	0.489157	5.10661	3.29919	0.00225602	0.0130934	-2.24136
6667	SP1	-0.403623	5.01973	-3.29722	0.00226804	0.0131561	-2.24639
84067	FAM160A2	0.552536	3.18168	3.29301	0.00229392	0.0132991	-2.25713
57697	FANCM	-0.46528	4.02806	-3.29223	0.00229878	0.0133162	-2.25913
1387	CREBBP	0.460827	6.52357	3.29214	0.00229932	0.0133162	-2.25936
57484	RNF150	0.436468	5.03619	3.29123	0.00230499	0.0133419	-2.26169
8891	EIF2B3	-0.366989	5.57968	-3.28898	0.002319	0.0134159	-2.26742
10678	B3GNT2	-0.594764	4.40159	-3.28857	0.00232156	0.0134196	-2.26847
10713	USP39	-0.304126	6.17762	-3.28849	0.00232211	0.0134196	-2.26869
7881	KCNAB1	0.676291	2.87731	3.28805	0.00232484	0.0134283	-2.26981
283106	CSNK2A3	-0.662864	3.69021	-3.28478	0.00234542	0.0135399	-2.27815
22985	ACIN1	0.433181	7.21777	3.28459	0.00234665	0.0135399	-2.27864
8774	NAPG	-0.513435	4.35343	-3.2843	0.00234851	0.0135434	-2.27939
55565	ZNF821	0.59675	3.23693	3.28256	0.00235953	0.0135998	-2.28382
10124	ARL4A	-0.512544	3.70212	-3.28177	0.00236456	0.0136216	-2.28584
51496	CTDSPL2	-0.311213	6.26055	-3.2812	0.00236817	0.0136351	-2.28728
4700	NDUFA6	-0.601421	3.82389	-3.281	0.00236947	0.0136354	-2.2878
3270	HRC	1.28098	1.97683	3.28051	0.00237256	0.013646	-2.28903
287	ANK2	0.471443	4.80397	3.2799	0.0023765	0.0136536	-2.29061
8448	DOC2A	-0.790453	2.59661	-3.27982	0.00237701	0.0136536	-2.29081
100126488	NA	-1.76646	1.55176	-3.27972	0.00237765	0.0136536	-2.29106
953	ENTPD1	0.368702	5.06139	3.27866	0.00238447	0.0136829	-2.29377
5429	POLH	-0.505661	3.80447	-3.27853	0.00238527	0.0136829	-2.29409
29095	ORMDL2	-0.420996	5.14682	-3.27717	0.00239403	0.0137259	-2.29756
84451	MLK4	0.746315	3.05699	3.27622	0.00240014	0.0137537	-2.29997
529	ATP6V1E1	-0.298526	6.81327	-3.27596	0.00240187	0.0137564	-2.30065
161436	EML5	-0.724224	4.75849	-3.27415	0.00241356	0.013816	-2.30524
375444	C5orf34	-0.732979	2.87159	-3.2732	0.00241979	0.0138444	-2.30768
6202	RPS8	-0.650925	7.69916	-3.27293	0.00242149	0.0138469	-2.30835
9448	MAP4K4	0.303708	8.45501	3.27253	0.00242415	0.0138548	-2.30939
65258	MPPE1	-0.898819	2.68172	-3.27212	0.00242683	0.0138629	-2.31044
146779	EFCAB3	-0.793381	2.93947	-3.2719	0.00242826	0.0138637	-2.31099
388	RHOB	0.456569	5.32614	3.27098	0.00243425	0.0138907	-2.31332
9482	STX8	-0.427455	4.798	-3.27059	0.00243679	0.0138978	-2.31431
53918	PELO	-0.34994	5.77474	-3.26841	0.00245115	0.0139725	-2.31987
5026	P2RX5	-1.35151	2.53237	-3.2666	0.00246308	0.0140331	-2.32446
5917	RARS	-0.337668	7.77736	-3.26306	0.00248665	0.01416	-2.33346
64975	MRPL41	-0.294397	7.00979	-3.2603	0.0025052	0.0142582	-2.34049
6875	TAF4B	-1.07034	2.66571	-3.26004	0.00250693	0.0142606	-2.34115
201626	PDE12	-0.36337	4.23768	-3.25916	0.00251285	0.0142867	-2.34338
5721	PSME2	-0.39595	5.28772	-3.25709	0.00252692	0.0143593	-2.34866
286319	TUSC1	0.4715	4.60634	3.25688	0.00252831	0.0143596	-2.34918
64422	ATG3	-0.384549	5.44495	-3.25611	0.00253358	0.0143821	-2.35114
7158	TP53BP1	0.313554	6.731	3.25582	0.00253552	0.0143856	-2.35187
7138	TNNT1	1.06558	3.55046	3.2555	0.00253772	0.0143906	-2.35269
9564	BCAR1	0.536064	4.13042	3.25498	0.00254128	0.0144032	-2.35401
2539	G6PD	-0.424145	5.20391	-3.25434	0.00254566	0.0144205	-2.35564
10598	AHSA1	-0.299958	7.9148	-3.25325	0.00255312	0.0144553	-2.35841
51491	NOP16	-0.448392	6.17754	-3.25227	0.00255983	0.0144858	-2.36089
5606	MAP2K3	-0.48278	4.5617	-3.25055	0.00257169	0.0145453	-2.36526
375743	PTAR1	-0.415164	5.82302	-3.24853	0.00258566	0.0146091	-2.37038
6662	SOX9	0.911406	3.94935	3.24835	0.00258693	0.0146091	-2.37084
10098	TSPAN5	-0.29809	6.32197	-3.24834	0.002587	0.0146091	-2.37087
10635	RAD51AP1	-0.388826	6.07263	-3.24775	0.00259104	0.014615	-2.37234
6421	SFPQ	0.399131	9.80918	3.24754	0.0025925	0.014615	-2.37287
2178	FANCE	-0.557635	4.40862	-3.24743	0.00259329	0.014615	-2.37316
81579	PLA2G12A	-0.612454	3.45146	-3.24741	0.00259342	0.014615	-2.37321
100505876	CEBPZOS	-0.368003	4.92162	-3.2465	0.00259979	0.0146433	-2.37553
79869	CPSF7	0.356538	6.19888	3.2459	0.00260399	0.0146594	-2.37705
5464	PPA1	-0.348175	6.90529	-3.24516	0.00260913	0.0146674	-2.37892
54464	XRN1	-0.458105	4.75984	-3.24502	0.00261012	0.0146674	-2.37928
7903	ST8SIA4	1.0582	1.98721	3.24493	0.00261072	0.0146674	-2.37949
87178	PNPT1	-0.410004	5.4295	-3.24492	0.0026108	0.0146674	-2.37952
9933	PUM3	-0.251861	7.17154	-3.2443	0.0026152	0.0146845	-2.38111
286183	NKAIN3	1.41425	1.07598	3.2436	0.00262007	0.0147009	-2.38287
101929128	LOC101929128	-2.03423	0.371946	-3.24349	0.00262082	0.0147009	-2.38314
10771	ZMYND11	0.298347	6.1546	3.24268	0.00262654	0.0147254	-2.3852
755	C21orf2	0.481547	4.49739	3.24135	0.00263596	0.0147706	-2.38858
392	ARHGAP1	0.444541	4.5515	3.24074	0.00264028	0.0147872	-2.39013
441191	RNF216P1	0.502323	5.2162	3.23727	0.00266495	0.0149177	-2.39892
2589	GALNT1	-0.246959	6.00127	-3.23624	0.0026723	0.0149511	-2.40152
8787	RGS9	-0.951535	1.94269	-3.23566	0.00267644	0.0149666	-2.40298
9898	UBAP2L	0.286772	8.15329	3.2346	0.00268407	0.0150016	-2.40567
191	AHCY	-0.335276	7.87744	-3.23401	0.0026883	0.0150175	-2.40716
115416	MALSU1	-0.313931	6.08125	-3.23257	0.00269869	0.0150678	-2.4108
23218	NBEAL2	-0.745778	2.19338	-3.23203	0.00270256	0.0150817	-2.41216
516	ATP5G1	-0.330194	8.81188	-3.22942	0.00272159	0.0151793	-2.41878
4201	MEA1	-0.408141	4.48754	-3.22924	0.00272284	0.0151793	-2.41922
57035	RSRP1	0.553863	4.81229	3.22748	0.00273572	0.0152361	-2.42367
5989	RFX1	0.423383	4.67659	3.22747	0.00273583	0.0152361	-2.42371
55176	SEC61A2	-0.667557	3.9846	-3.22587	0.00274754	0.0152935	-2.42775
23555	TSPAN15	-1.32948	1.63894	-3.22527	0.00275195	0.0153032	-2.42926
23220	DTX4	1.62802	0.433115	3.2251	0.0027532	0.0153032	-2.42969
3800	KIF5C	0.353908	6.63989	3.22506	0.0027535	0.0153032	-2.42979
11062	DUS4L	-0.543885	3.61226	-3.22472	0.00275601	0.0153093	-2.43065
643763	UG0898H09	1.54822	0.358199	3.22349	0.00276507	0.0153518	-2.43375
6483	ST3GAL2	0.43263	5.13445	3.22267	0.00277116	0.0153732	-2.43583
3767	KCNJ11	-0.554945	3.00949	-3.22259	0.00277176	0.0153732	-2.43603
143903	LAYN	-0.77197	5.1158	-3.22156	0.00277942	0.0154079	-2.43864
58505	OSTC	0.252625	6.90633	3.22017	0.00278974	0.0154572	-2.44214
10026	PIGK	-0.4742	4.11673	-3.21951	0.0027947	0.0154768	-2.44381
4325	MMP16	0.461739	5.36816	3.21907	0.00279798	0.0154871	-2.44492
79191	IRX3	0.48581	5.31963	3.21799	0.00280604	0.0155238	-2.44764
84726	PRRC2B	0.304073	7.33256	3.21749	0.00280979	0.0155366	-2.4489
22878	TRAPPC8	-0.45004	4.14008	-3.21592	0.00282163	0.0155942	-2.45287
100303755	PET117	-0.972742	2.68768	-3.21561	0.00282395	0.0155991	-2.45364
414241	FAM35BP	-0.442636	4.15405	-3.21526	0.0028266	0.0156058	-2.45453
79631	EFL1	-0.495966	4.63744	-3.21483	0.00282987	0.0156159	-2.45562
221908	PPP1R35	-0.378739	4.5249	-3.21343	0.00284049	0.0156662	-2.45916
254428	SLC41A1	-0.431406	5.48312	-3.21325	0.00284186	0.0156662	-2.45961
1781	DYNC1I2	0.272188	8.75097	3.21293	0.00284428	0.0156717	-2.46042
678	ZFP36L2	0.379008	5.35087	3.21193	0.00285185	0.0157054	-2.46292
120	ADD3	0.460007	6.22492	3.21151	0.00285512	0.0157154	-2.464
10490	VTI1B	-0.651639	2.96325	-3.20911	0.00287344	0.0158083	-2.47004
55198	APPL2	0.429784	3.84399	3.20879	0.00287593	0.015814	-2.47086
84364	ARFGAP2	0.377279	4.36711	3.20805	0.00288156	0.0158347	-2.4727
11117	EMILIN1	0.558538	5.55884	3.20792	0.00288261	0.0158347	-2.47305
8997	KALRN	0.545718	4.17431	3.20595	0.00289779	0.0159101	-2.478
11158	RABL2B	0.303211	5.84805	3.20517	0.00290383	0.0159352	-2.47997
27324	TOX3	0.677233	4.16152	3.20147	0.00293261	0.016085	-2.48927
29904	EEF2K	-0.371301	5.14176	-3.20006	0.00294372	0.0161378	-2.49284
84440	RAB11FIP4	0.805551	4.19873	3.1959	0.00297654	0.0163095	-2.5033
100507316	MINCR	-0.842371	2.77151	-3.1954	0.00298054	0.0163232	-2.50456
840	CASP7	0.427859	4.07337	3.19452	0.00298747	0.0163529	-2.50675
161742	SPRED1	0.344579	4.98452	3.19414	0.0029905	0.0163613	-2.50771
10295	BCKDK	-0.491607	5.22411	-3.19288	0.00300063	0.0164085	-2.5109
10549	PRDX4	-0.277036	6.6817	-3.1922	0.00300601	0.0164296	-2.51259
51069	MRPL2	-0.395648	5.06253	-3.19104	0.00301535	0.0164724	-2.51551
7095	SEC62	0.255731	8.25165	3.19045	0.00302008	0.01649	-2.51699
131566	DCBLD2	-0.467403	4.90293	-3.18917	0.00303042	0.0165381	-2.52021
282809	POC1B	-0.574361	4.34787	-3.18632	0.0030535	0.0166558	-2.52737
84823	LMNB2	0.274984	6.88193	3.18572	0.00305839	0.0166687	-2.52888
493869	GPX8	2.08163	0.655536	3.18565	0.00305894	0.0166687	-2.52905
339263	C17orf51	0.96848	3.38876	3.18477	0.00306613	0.0166995	-2.53126
8189	SYMPK	0.321167	6.70015	3.18318	0.00307909	0.0167538	-2.53524
[truncated: 8,883 more rows]

## Sheet: IMR-32_EPZ011989_Response
GeneID	Symbol	logFC	AveExpr	t	P.Value	adj.P.Val	B
253738	EBF3	2.63973	5.19498	23.061	1.46858e-22	1.59811e-18	39.7324
11075	STMN2	3.56929	8.01246	20.1691	1.09894e-20	5.97931e-17	36.001
7025	NR2F1	3.71316	4.24344	18.9009	8.6332e-20	3.13155e-16	34.1705
2596	GAP43	2.27651	5.06777	15.9097	1.81982e-17	4.95082e-14	29.2965
4646	MYO6	1.47114	6.54764	14.7631	1.74506e-16	3.79796e-13	27.1922
10586	MAB21L2	2.35736	5.5597	14.3938	3.71584e-16	6.7393e-13	26.4835
91404	SESTD1	2.5717	4.43473	13.9219	9.96476e-16	1.52139e-12	25.5549
4857	NOVA1	3.02383	3.71066	13.8349	1.19841e-15	1.52139e-12	25.3807
55450	CAMK2N1	4.33316	2.7828	13.812	1.25827e-15	1.52139e-12	25.3347
5074	PAWR	1.78423	4.71182	13.288	3.89451e-15	4.02351e-12	24.2654
5454	POU3F2	2.99355	3.87495	13.2681	4.06714e-15	4.02351e-12	24.2243
4741	NEFM	1.63374	9.10144	13.218	4.53952e-15	4.11659e-12	24.12
22998	LIMCH1	1.06439	7.19857	12.7769	1.20755e-14	1.01082e-11	23.1898
5274	SERPINI1	3.01964	2.77455	12.6119	1.75122e-14	1.3612e-11	22.8354
9745	ZNF536	2.45267	4.71539	12.5359	2.08078e-14	1.50954e-11	22.6709
57522	SRGAP1	1.83291	4.24579	12.4535	2.51025e-14	1.70728e-11	22.4918
81557	MAGED4B	1.53793	5.27878	12.3231	3.38353e-14	2.16586e-11	22.2066
8531	YBX3	6.45748	3.12	12.0196	6.83075e-14	4.12957e-11	21.5342
214	ALCAM	1.12767	7.1194	11.9332	8.36112e-14	4.78872e-11	21.3405
60312	AFAP1	1.21284	5.51767	11.4468	2.65363e-13	1.44384e-10	20.2313
5457	POU4F1	4.23837	1.98401	11.367	3.2157e-13	1.66634e-10	20.0464
728392	LOC728392	1.51143	3.9861	11.1951	4.88001e-13	2.41383e-10	19.6447
55796	MBNL3	1.68541	4.56663	10.8816	1.05396e-12	4.98662e-10	18.9019
2296	FOXC1	1.44631	5.8148	10.2405	5.29421e-12	2.40048e-09	17.3403
23705	CADM1	0.943603	7.87446	9.97369	1.05282e-11	4.58274e-09	16.6735
93183	PIGM	1.22113	6.4124	9.71221	2.08394e-11	8.72208e-09	16.0102
1641	DCX	1.21383	7.16063	9.60653	2.75312e-11	1.10961e-08	15.7395
6495	SIX1	2.40986	4.82466	9.46248	4.03374e-11	1.53707e-08	15.3679
6657	SOX2	-1.49635	3.98526	-9.4567	4.09621e-11	1.53707e-08	15.3529
6891	TAP2	3.10501	2.12382	9.29535	6.30428e-11	2.28677e-08	14.9331
2869	GRK5	1.17446	5.28547	9.21896	7.74116e-11	2.7174e-08	14.7331
22874	PLEKHA6	1.8124	4.4395	9.18475	8.48862e-11	2.88666e-08	14.6433
5530	PPP3CA	0.827708	7.8042	9.06729	1.1663e-10	3.84596e-08	14.3337
9768	KIAA0101	-0.686746	8.62698	-8.82266	2.2731e-10	7.27525e-08	13.6828
27253	PCDH17	1.17629	6.25507	8.68174	3.35008e-10	1.04159e-07	13.3043
113263	GLCCI1	0.970754	6.54	8.6572	3.58515e-10	1.08371e-07	13.2381
84684	INSM2	2.47329	4.37035	8.58388	4.39217e-10	1.29177e-07	13.0398
28514	DLL1	2.57879	1.81741	8.5454	4.88722e-10	1.39954e-07	12.9355
27324	TOX3	1.80309	4.16152	8.52373	5.19074e-10	1.44835e-07	12.8767
26022	TMEM98	0.836854	6.38418	8.50761	5.42871e-10	1.47688e-07	12.8329
219699	UNC5B	-1.13299	7.92607	-8.48309	5.81243e-10	1.5427e-07	12.7661
2626	GATA4	4.07695	2.41159	8.44414	6.47915e-10	1.6565e-07	12.66
3015	H2AFZ	-0.577339	10.4957	-8.44048	6.54563e-10	1.6565e-07	12.6501
3280	HES1	2.5996	3.21979	8.34358	8.58357e-10	2.12287e-07	12.3852
23254	KAZN	1.45978	4.47243	8.31192	9.38079e-10	2.26848e-07	12.2984
4313	MMP2	1.22729	4.89361	8.27538	1.03949e-09	2.45908e-07	12.198
23208	SYT11	0.688369	7.69973	8.26608	1.06703e-09	2.47052e-07	12.1725
57713	SFMBT2	2.54142	2.29061	8.20038	1.28394e-09	2.9108e-07	11.9916
55084	SOBP	0.948552	5.45646	8.08044	1.80229e-09	3.98797e-07	11.6599
10749	KIF1C	-1.10555	5.22005	-8.0746	1.83237e-09	3.98797e-07	11.6437
79145	CHCHD7	1.44318	3.98145	8.03834	2.03098e-09	4.33355e-07	11.5431
2624	GATA2	1.55485	6.15005	8.01439	2.17393e-09	4.54937e-07	11.4765
90246	LOC90246	3.10043	1.70662	8.00439	2.23664e-09	4.59228e-07	11.4487
3229	HOXC13	4.40725	-0.0643229	7.98141	2.38778e-09	4.81181e-07	11.3847
57495	NWD2	4.22513	-0.431553	7.97434	2.4363e-09	4.82034e-07	11.3651
7026	NR2F2	0.80561	6.78717	7.93943	2.69105e-09	5.22929e-07	11.2678
101927167	GATA2-AS1	3.44114	2.1623	7.91475	2.88736e-09	5.51232e-07	11.1989
9149	DYRK1B	1.26841	3.77125	7.89577	3.04814e-09	5.71893e-07	11.1459
10095	ARPC1B	-1.27649	4.01722	-7.82514	3.73049e-09	6.84248e-07	10.9482
64207	IRF2BPL	-0.763428	7.25541	-7.82121	3.77273e-09	6.84248e-07	10.9372
221981	THSD7A	1.63392	4.61971	7.80392	3.96433e-09	7.07211e-07	10.8887
285761	DCBLD1	1.73511	3.50541	7.79177	4.10485e-09	7.20468e-07	10.8546
2120	ETV6	0.844046	5.46565	7.78322	4.20675e-09	7.26632e-07	10.8306
51523	CXXC5	0.812479	7.01214	7.7443	4.70405e-09	7.99835e-07	10.7212
56977	STOX2	0.867108	5.02885	7.61694	6.78866e-09	1.13653e-06	10.3621
334	APLP2	0.839572	9.17612	7.58547	7.43463e-09	1.22581e-06	10.2732
59284	CACNG7	2.54808	0.726907	7.54941	8.25191e-09	1.34026e-06	10.171
6092	ROBO2	2.59613	3.37675	7.54282	8.4109e-09	1.34599e-06	10.1524
994	CDC25B	-0.797629	7.01628	-7.52304	8.90675e-09	1.40468e-06	10.0963
89797	NAV2	1.16004	4.81024	7.50021	9.51596e-09	1.47932e-06	10.0315
51201	ZDHHC2	2.9976	2.36536	7.49117	9.76861e-09	1.49721e-06	10.0058
57611	ISLR2	1.36609	3.75674	7.45347	1.08982e-08	1.64715e-06	9.89869
728215	FAM155A	0.741087	5.87414	7.4338	1.1539e-08	1.7201e-06	9.84274
23657	SLC7A11	-4.31731	4.04159	-7.41903	1.20454e-08	1.77132e-06	9.80069
167410	LIX1	3.70085	1.49166	7.37932	1.35209e-08	1.96179e-06	9.68753
4914	NTRK1	1.32153	5.19614	7.33288	1.54804e-08	2.21655e-06	9.55499
56731	SLC2A4RG	-1.09478	5.98895	-7.30521	1.67821e-08	2.34411e-06	9.47592
6747	SSR3	-0.609938	8.54052	-7.3027	1.69055e-08	2.34411e-06	9.46874
51191	HERC5	1.21357	4.36669	7.30044	1.70175e-08	2.34411e-06	9.46228
64067	NPAS3	2.29223	2.47976	7.27979	1.8075e-08	2.41614e-06	9.40324
1728	NQO1	-1.01122	5.50074	-7.27793	1.81736e-08	2.41614e-06	9.39791
5324	PLAG1	3.94954	1.40138	7.27731	1.82066e-08	2.41614e-06	9.39613
3959	LGALS3BP	1.04441	7.07673	7.25462	1.94552e-08	2.55074e-06	9.33117
4747	NEFL	0.695129	7.12601	7.23049	2.08783e-08	2.70474e-06	9.26203
56256	SERTAD4	1.14181	4.00763	7.2111	2.20972e-08	2.82897e-06	9.20646
10608	MXD4	0.832438	5.66542	7.16061	2.56214e-08	3.24201e-06	9.06152
10602	CDC42EP3	-0.69659	7.81791	-7.1552	2.60315e-08	3.25604e-06	9.04597
5800	PTPRO	0.871572	4.89726	7.12444	2.84909e-08	3.52316e-06	8.95755
144165	PRICKLE1	0.98257	5.122	7.10942	2.9776e-08	3.64071e-06	8.91434
483	ATP1B3	-0.428221	7.69062	-7.07711	3.2743e-08	3.95825e-06	8.8213
5621	PRNP	1.2153	4.31917	7.07342	3.31006e-08	3.95825e-06	8.81066
1948	EFNB2	1.30213	3.801	7.05479	3.49647e-08	4.11612e-06	8.757
3488	IGFBP5	1.38636	6.24216	7.05273	3.51773e-08	4.11612e-06	8.75106
3068	HDGF	-0.36022	10.4182	-7.03419	3.71505e-08	4.30077e-06	8.69761
5295	PIK3R1	1.06576	5.59922	6.9912	4.21687e-08	4.83031e-06	8.57351
6474	SHOX2	1.20707	6.15366	6.96184	4.59838e-08	5.21246e-06	8.48868
283209	PGM2L1	0.838348	5.15876	6.93576	4.96634e-08	5.57152e-06	8.41328
25902	MTHFD1L	-0.94222	5.65631	-6.89528	5.59738e-08	6.21538e-06	8.29612
166	AES	0.636756	7.82634	6.88184	5.82442e-08	6.34941e-06	8.25717
3382	ICA1	1.01147	5.33359	6.88124	5.83479e-08	6.34941e-06	8.25543
9557	CHD1L	0.469169	7.66724	6.86183	6.17966e-08	6.65812e-06	8.19919
27341	RRP7A	-0.932943	5.16656	-6.83961	6.59976e-08	7.04103e-06	8.13477
94241	TP53INP1	1.46176	4.20939	6.81036	7.19712e-08	7.60379e-06	8.0499
26528	DAZAP1	-0.390736	8.30689	-6.79811	7.46333e-08	7.70223e-06	8.01433
6510	SLC1A5	-1.38094	7.16432	-6.79634	7.50259e-08	7.70223e-06	8.00919
7088	TLE1	0.854564	4.7858	6.79361	7.56349e-08	7.70223e-06	8.00127
158038	LINGO2	1.00108	5.17404	6.79317	7.57341e-08	7.70223e-06	7.99999
6752	SSTR2	1.23555	5.89666	6.78336	7.79695e-08	7.85615e-06	7.9715
25789	TMEM59L	1.54785	3.0395	6.77684	7.94916e-08	7.93604e-06	7.95256
80017	C14orf159	0.726164	4.63616	6.76214	8.30363e-08	8.21455e-06	7.90984
6415	SELENOW	0.874715	7.62096	6.73068	9.11658e-08	8.93753e-06	7.81836
80830	APOL6	-2.42799	3.60021	-6.71115	9.661e-08	9.38669e-06	7.76155
2907	GRINA	0.593608	6.55928	6.70688	9.78432e-08	9.42239e-06	7.74913
51160	VPS28	0.621114	7.17642	6.68166	1.05462e-07	1.0067e-05	7.6757
91775	NXPE3	-0.601184	5.14083	-6.66378	1.11223e-07	1.04743e-05	7.62361
552889	ATXN7L3B	0.491918	6.99618	6.66248	1.11654e-07	1.04743e-05	7.61982
116028	RMI2	-0.533759	5.65747	-6.65601	1.13823e-07	1.05865e-05	7.60098
25946	ZNF385A	1.25723	4.13197	6.6373	1.20342e-07	1.09679e-05	7.54644
60496	AASDHPPT	0.527102	6.52418	6.63573	1.20904e-07	1.09679e-05	7.54188
57007	ACKR3	2.55762	1.99601	6.63561	1.20947e-07	1.09679e-05	7.54153
4884	NPTX1	2.72461	2.16842	6.59533	1.36364e-07	1.22637e-05	7.42404
6664	SOX11	0.645429	9.29103	6.56018	1.51428e-07	1.35069e-05	7.32143
1363	CPE	0.646595	6.48301	6.54418	1.58832e-07	1.40521e-05	7.27469
10436	EMG1	-0.595932	6.13027	-6.50715	1.77389e-07	1.55673e-05	7.16649
100507602	TRIM52-AS1	-1.00949	4.10489	-6.47955	1.92635e-07	1.677e-05	7.08577
56894	AGPAT3	0.728476	5.74623	6.46778	1.99527e-07	1.72321e-05	7.05135
5052	PRDX1	-0.421678	9.5762	-6.44816	2.11583e-07	1.81295e-05	6.99391
55959	SULF2	0.797914	6.15678	6.44026	2.16639e-07	1.84177e-05	6.97079
27344	PCSK1N	1.31408	4.82097	6.43512	2.19994e-07	1.8525e-05	6.95574
57556	SEMA6A	0.767879	6.31736	6.43313	2.21306e-07	1.8525e-05	6.94993
5569	PKIA	0.49419	6.82264	6.40907	2.37818e-07	1.96609e-05	6.87948
56967	C14orf132	0.495961	7.25678	6.40813	2.38489e-07	1.96609e-05	6.87672
28227	PPP2R3B	-0.94506	3.62225	-6.40394	2.41501e-07	1.9666e-05	6.86443
4199	ME1	-1.09806	3.75363	-6.40302	2.42165e-07	1.9666e-05	6.86174
80731	THSD7B	1.08208	4.53812	6.37819	2.60846e-07	2.10261e-05	6.789
2119	ETV5	-1.14588	5.59758	-6.37256	2.6528e-07	2.12263e-05	6.7725
7764	ZNF217	-0.682582	5.28505	-6.34966	2.84114e-07	2.25674e-05	6.70536
23767	FLRT3	1.00956	4.5729	6.33302	2.98629e-07	2.35484e-05	6.65659
84722	PSRC1	-0.62956	5.66518	-6.32692	3.04143e-07	2.38107e-05	6.63868
387640	SKIDA1	-0.822905	4.70489	-6.30049	3.29216e-07	2.55895e-05	6.56114
8492	PRSS12	-0.755846	6.42505	-6.28915	3.40599e-07	2.62865e-05	6.52787
11004	KIF2C	-0.598851	6.42026	-6.28078	3.49256e-07	2.67648e-05	6.50331
57482	KIAA1211	0.593122	5.06646	6.24416	3.89816e-07	2.96642e-05	6.39578
8773	SNAP23	-1.31119	4.11665	-6.22924	4.07676e-07	3.08079e-05	6.35194
29028	ATAD2	-0.48257	7.36732	-6.2169	4.23055e-07	3.17269e-05	6.31571
4920	ROR2	0.988859	4.06601	6.21485	4.25669e-07	3.17269e-05	6.30968
7546	ZIC2	3.25902	0.203558	6.20013	4.449e-07	3.29347e-05	6.26644
961	CD47	0.64454	6.60638	6.16649	4.92211e-07	3.61908e-05	6.16756
23191	CYFIP1	0.885982	4.77646	6.16114	5.00195e-07	3.6531e-05	6.15181
27092	CACNG4	1.08802	4.86066	6.14105	5.31322e-07	3.85456e-05	6.09275
60468	BACH2	1.29253	3.40107	6.13532	5.40554e-07	3.88402e-05	6.0759
348235	SKA2	-0.43929	8.24619	-6.13411	5.42521e-07	3.88402e-05	6.07234
4249	MGAT5	0.727391	5.88753	6.13055	5.48364e-07	3.90019e-05	6.06186
6612	SUMO3	-0.516617	7.98371	-6.11718	5.70847e-07	4.03374e-05	6.02255
4237	MFAP2	1.75476	2.35516	6.11245	5.79029e-07	4.06516e-05	6.00863
238	ALK	1.97467	2.72483	6.10652	5.89444e-07	4.11175e-05	5.99119
8407	TAGLN2	0.740938	7.54857	6.09914	6.02673e-07	4.17725e-05	5.96948
153830	RNF145	-0.433812	6.97892	-6.09643	6.07612e-07	4.18483e-05	5.96149
4761	NEUROD2	3.63764	0.781683	6.08375	6.31235e-07	4.32019e-05	5.92418
10076	PTPRU	1.00124	3.89073	6.06483	6.68198e-07	4.54458e-05	5.86852
56204	FAM214A	0.834361	3.7911	6.05797	6.82145e-07	4.61062e-05	5.84831
9061	PAPSS1	0.688439	6.87248	6.04566	7.07888e-07	4.75509e-05	5.81208
27173	SLC39A1	-0.402174	7.46085	-6.03422	7.32681e-07	4.8909e-05	5.77841
4522	MTHFD1	-0.40286	7.28104	-6.03223	7.37096e-07	4.8909e-05	5.77254
23316	CUX2	1.72899	3.44687	5.97165	8.84598e-07	5.83406e-05	5.59415
164284	APCDD1L	1.85361	2.16739	5.9659	9.00044e-07	5.886e-05	5.57722
5984	RFC4	-0.531625	6.40649	-5.96436	9.04224e-07	5.886e-05	5.57269
29106	SCG3	0.762954	7.26208	5.96272	9.087e-07	5.886e-05	5.56786
121268	RHEBL1	-1.38949	3.29434	-5.95679	9.25085e-07	5.9266e-05	5.55039
149297	FAM78B	0.983641	4.97338	5.95651	9.25861e-07	5.9266e-05	5.54957
55924	FAM212B	1.55311	2.87912	5.94445	9.60133e-07	6.11004e-05	5.51403
4853	NOTCH2	2.48877	3.05008	5.90184	1.09171e-06	6.90696e-05	5.38847
10868	USP20	0.804363	3.45901	5.89619	1.11046e-06	6.98498e-05	5.37183
55607	PPP1R9A	3.40508	1.4867	5.88303	1.15537e-06	7.22573e-05	5.33307
6879	TAF7	0.358708	7.47112	5.87823	1.17223e-06	7.28928e-05	5.31891
80179	MYO19	-0.798307	3.93966	-5.87367	1.18844e-06	7.30693e-05	5.30548
65220	NADK	-0.641313	4.61386	-5.87261	1.19227e-06	7.30693e-05	5.30234
655	BMP7	0.784035	5.24947	5.87108	1.19777e-06	7.30693e-05	5.29784
429	ASCL1	-0.701982	9.21852	-5.86993	1.20193e-06	7.30693e-05	5.29445
27235	COQ2	-0.642376	5.17243	-5.85932	1.24099e-06	7.46117e-05	5.26319
9698	PUM1	0.386853	7.35638	5.85932	1.24101e-06	7.46117e-05	5.26317
1163	CKS1B	-0.592987	9.16746	-5.85576	1.25439e-06	7.50015e-05	5.2527
57690	TNRC6C	0.744352	6.20644	5.8498	1.27716e-06	7.59455e-05	5.23512
90362	FAM110B	1.0155	3.85028	5.8276	1.36561e-06	8.07637e-05	5.16967
56999	ADAMTS9	-0.911744	5.61371	-5.81566	1.41568e-06	8.32724e-05	5.13448
10982	MAPRE2	0.493634	6.13979	5.80532	1.46053e-06	8.54486e-05	5.10401
63908	NAPB	0.984716	3.84919	5.78152	1.56926e-06	9.1319e-05	5.03384
3728	JUP	0.815692	5.49268	5.77739	1.58893e-06	9.1972e-05	5.02167
27075	TSPAN13	0.733448	5.33359	5.75984	1.67534e-06	9.64604e-05	4.96993
80817	CEP44	-0.528021	7.98036	-5.75014	1.72509e-06	9.88025e-05	4.94134
9538	EI24	-0.386943	7.40958	-5.74547	1.74956e-06	9.96794e-05	4.92758
5871	MAP4K2	-1.1003	2.7952	-5.74119	1.77231e-06	0.000100449	4.91496
11339	OIP5	-0.669911	5.27041	-5.73199	1.82219e-06	0.000102741	4.88785
56475	RPRM	0.988256	5.02454	5.7295	1.83594e-06	0.000102917	4.8805
10659	CELF2	1.03296	5.01069	5.72801	1.84421e-06	0.000102917	4.87611
4135	MAP6	1.15611	3.4958	5.72412	1.86596e-06	0.000103599	4.86466
7494	XBP1	-1.20634	6.40966	-5.71652	1.90927e-06	0.000105465	4.84225
154043	CNKSR3	2.12123	2.54112	5.70985	1.94813e-06	0.000106466	4.82257
9466	IL27RA	-1.08847	2.7262	-5.70905	1.95282e-06	0.000106466	4.82022
258010	SVIP	0.626049	5.85535	5.70838	1.95674e-06	0.000106466	4.81826
11320	MGAT4A	1.5839	1.91486	5.70636	1.96876e-06	0.000106587	4.81228
50632	CALY	1.29948	3.87131	5.703	1.98882e-06	0.00010714	4.80238
8715	NOL4	0.885256	4.09637	5.69743	2.02253e-06	0.00010842	4.78596
2009	EML1	1.10468	3.07558	5.68941	2.07206e-06	0.00011053	4.76233
7832	BTG2	0.714835	4.70302	5.68709	2.08665e-06	0.000110765	4.75548
10581	IFITM2	-1.37361	4.37339	-5.67994	2.13217e-06	0.000112632	4.7344
23475	QPRT	0.455659	7.06509	5.66351	2.2406e-06	0.000117788	4.68596
55509	BATF3	1.11182	3.55506	5.65941	2.26847e-06	0.000118005	4.67389
80318	GKAP1	0.854672	7.05759	5.65932	2.26906e-06	0.000118005	4.67363
2582	GALE	-0.848061	3.58569	-5.65813	2.27725e-06	0.000118005	4.67012
84787	KMT5C	-0.592525	5.31131	-5.65591	2.29253e-06	0.000118234	4.66358
55083	KIF26B	1.2577	2.98172	5.6328	2.45824e-06	0.000126182	4.59544
8886	DDX18	-0.298496	8.6001	-5.62611	2.50836e-06	0.00012815	4.57573
5362	PLXNA2	1.6076	4.8638	5.62343	2.52874e-06	0.000128588	4.56783
8933	FAM127A	0.436529	6.92655	5.6163	2.58378e-06	0.000130429	4.54681
653820	FAM72B	-0.851531	5.98389	-5.61564	2.58892e-06	0.000130429	4.54487
4094	MAF	3.09474	-0.0772609	5.61067	2.62801e-06	0.000131788	4.53024
4343	MOV10	-0.782755	4.48603	-5.60685	2.65854e-06	0.000132708	4.51896
8507	ENC1	1.09046	5.40526	5.5951	2.75454e-06	0.000136872	4.48434
1777	DNASE2	-1.49695	4.13676	-5.58592	2.83191e-06	0.000140076	4.4573
10376	TUBA1B	-0.580551	12.1495	-5.58395	2.84881e-06	0.000140144	4.45149
302	ANXA2	-0.544786	8.03901	-5.58276	2.85902e-06	0.000140144	4.44799
51760	SYT17	1.30061	3.15077	5.58072	2.87672e-06	0.000140379	4.44197
1114	CHGB	0.967942	8.04543	5.56083	3.05475e-06	0.000148401	4.38336
266727	MDGA1	2.05204	2.09359	5.55859	3.07551e-06	0.000148649	4.37675
4558	TRNF	1.02514	10.1861	5.55636	3.09624e-06	0.000148649	4.3702
81559	TRIM11	-0.558113	7.13607	-5.55587	3.10084e-06	0.000148649	4.36875
92482	BBIP1	-0.653308	4.27382	-5.5434	3.21983e-06	0.000153676	4.332
55086	CXorf57	3.12671	0.042445	5.53742	3.27842e-06	0.000155206	4.3144
3778	KCNMA1	1.16089	4.13117	5.53695	3.28313e-06	0.000155206	4.313
140578	CHODL	1.01526	4.05689	5.53578	3.29467e-06	0.000155206	4.30957
63939	FAM217B	0.690101	6.00878	5.52929	3.35987e-06	0.000157595	4.29045
9926	LPGAT1	0.645953	5.77727	5.52191	3.43565e-06	0.000160458	4.26869
10460	TACC3	-0.496702	7.29993	-5.52045	3.45082e-06	0.000160478	4.26439
29967	LRP12	0.477421	5.04271	5.51085	3.55228e-06	0.000164493	4.23611
83695	RHNO1	-0.542275	5.51167	-5.50151	3.65385e-06	0.00016827	4.20861
4644	MYO5A	1.14088	3.72713	5.50052	3.66476e-06	0.00016827	4.2057
7259	TSPYL1	0.527071	6.12044	5.48918	3.79239e-06	0.000172924	4.1723
51299	NRN1	3.63112	0.678199	5.4887	3.79791e-06	0.000172924	4.17088
78991	PCYOX1L	0.658456	4.80758	5.48642	3.8241e-06	0.000173391	4.16417
23236	PLCB1	0.576708	6.32734	5.47212	3.99276e-06	0.000180287	4.12207
392255	GDF6	2.45834	0.135936	5.47008	4.01752e-06	0.000180656	4.11604
5819	NECTIN2	1.0114	4.50215	5.46576	4.07025e-06	0.000182273	4.10332
7378	UPP1	1.57355	2.08682	5.46439	4.08701e-06	0.000182274	4.09931
5888	RAD51	-0.648334	5.01933	-5.45847	4.16076e-06	0.000184806	4.08187
10200	MPHOSPH6	0.417571	6.24511	5.45348	4.22392e-06	0.000186258	4.06717
9491	PSMF1	0.358047	6.60336	5.45318	4.22769e-06	0.000186258	4.0663
18	ABAT	0.99891	3.35287	5.44121	4.38329e-06	0.000191891	4.03105
64847	SPATA20	0.781219	4.02657	5.44064	4.39081e-06	0.000191891	4.02938
4010	LMX1B	2.15657	2.15432	5.4391	4.41121e-06	0.000192011	4.02486
23177	CEP68	0.635152	4.85459	5.42262	4.63615e-06	0.000200277	3.97635
23741	EID1	0.403818	9.37606	5.42213	4.643e-06	0.000200277	3.97492
64220	STRA6	1.13301	5.13146	5.42119	4.65632e-06	0.000200277	3.97212
3074	HEXB	-0.717122	4.76183	-5.40938	4.82514e-06	0.000206721	3.93739
2063	NR2F6	-0.471933	6.49701	-5.4077	4.8497e-06	0.000206958	3.93244
115207	KCTD12	0.821224	4.86995	5.3927	5.07431e-06	0.000215698	3.8883
2355	FOSL2	-0.99183	4.64321	-5.38957	5.12249e-06	0.000216899	3.87908
23443	SLC35A3	-0.937323	3.52559	-5.38591	5.1793e-06	0.000218454	3.86833
165545	DQX1	0.816154	6.17205	5.38258	5.23156e-06	0.000219806	3.85854
3845	KRAS	-0.433616	6.94847	-5.35996	5.60108e-06	0.000234427	3.79201
10905	MAN1A2	0.416786	9.26139	5.35614	5.66613e-06	0.000236241	3.78075
101927034	ROR1-AS1	1.73035	3.2242	5.35244	5.72975e-06	0.000237982	3.76987
9053	MAP7	2.13957	2.01897	5.34925	5.78513e-06	0.000239368	3.76049
415116	PIM3	-0.572066	7.36081	-5.3443	5.87213e-06	0.000242048	3.74594
4502	MT2A	-0.657936	6.92702	-5.3406	5.93811e-06	0.000243843	3.73505
490	ATP2B1	0.540026	6.8908	5.32467	6.23023e-06	0.000254877	3.68825
55038	CDCA4	-0.56012	6.14519	-5.32074	6.30469e-06	0.000256958	3.67667
79041	TMEM38A	0.985904	3.50498	5.3183	6.35123e-06	0.000257889	3.66951
2589	GALNT1	0.404972	6.00127	5.30691	6.57309e-06	0.000265125	3.63605
11030	RBPMS	-0.625037	5.51363	-5.30666	6.57817e-06	0.000265125	3.63529
347733	TUBB2B	0.749258	8.66328	5.29984	6.71482e-06	0.000269634	3.61526
11178	LZTS1	0.913242	6.09246	5.28479	7.02663e-06	0.000281117	3.57104
79980	DSN1	-0.392982	5.94061	-5.27226	7.29715e-06	0.000290135	3.53423
29767	TMOD2	0.795128	4.78868	5.27188	7.30537e-06	0.000290135	3.53314
6500	SKP1	0.375915	8.5308	5.26073	7.55517e-06	0.000298965	3.50038
5754	PTK7	-0.662914	5.61692	-5.25904	7.59385e-06	0.000299407	3.49541
6749	SSRP1	-0.309731	9.4166	-5.25075	7.78591e-06	0.000305871	3.47108
6627	SNRPA1	-0.433667	6.98963	-5.24624	7.89236e-06	0.000308937	3.45785
6809	STX3	0.85158	3.69285	5.24475	7.92788e-06	0.000309216	3.45348
9054	NFS1	-0.730666	4.16754	-5.23449	8.17709e-06	0.000317797	3.42334
9832	JAKMIP2	0.666939	5.8058	5.22261	8.47512e-06	0.000327513	3.38847
1655	DDX5	0.651907	8.69362	5.22213	8.48729e-06	0.000327513	3.38708
9921	RNF10	-0.387995	6.78677	-5.21084	8.78098e-06	0.000337649	3.35395
9421	HAND1	0.978845	6.5258	5.20797	8.85711e-06	0.000339377	3.34554
57161	PELI2	0.603461	5.62493	5.20628	8.90254e-06	0.000339921	3.34056
10055	SAE1	-0.371376	8.19548	-5.20012	9.06923e-06	0.000345075	3.3225
27244	SESN1	0.909785	3.66946	5.18822	9.40007e-06	0.000356417	3.28762
5933	RBL1	-0.738723	4.37975	-5.18617	9.45836e-06	0.000357382	3.2816
5723	PSPH	-1.82421	5.20702	-5.16579	1.00572e-05	0.000377646	3.22183
1213	CLTC	-0.411151	8.8033	-5.16556	1.00641e-05	0.000377646	3.22117
579	NKX3-2	2.8307	0.76891	5.16278	1.01487e-05	0.000379511	3.21303
1870	E2F2	-0.788157	4.96944	-5.15633	1.03479e-05	0.000385636	3.1941
10712	FAM189B	-0.561416	4.81545	-5.14808	1.0608e-05	0.000393982	3.16994
9747	TCAF1	0.426499	7.35768	5.14188	1.08077e-05	0.000400034	3.15179
4175	MCM6	-0.455862	6.86973	-5.13494	1.10361e-05	0.000405985	3.13144
51142	CHCHD2	-0.389282	10.5994	-5.13473	1.10432e-05	0.000405985	3.13082
266812	NAP1L5	0.717104	4.6226	5.13298	1.11013e-05	0.000406747	3.12571
10534	SSSCA1	-0.729039	4.23365	-5.13124	1.11596e-05	0.000407514	3.12061
10513	APPBP2	0.539345	6.15759	5.13006	1.11994e-05	0.000407597	3.11715
8036	SHOC2	-0.54502	5.84631	-5.12081	1.15153e-05	0.0004177	3.09007
84706	GPT2	-1.69066	6.47268	-5.11955	1.15593e-05	0.000417902	3.08637
2932	GSK3B	0.369174	6.50082	5.11644	1.16678e-05	0.000420427	3.07728
64222	TOR3A	-0.817251	4.53196	-5.11484	1.17242e-05	0.000421065	3.07258
6856	SYPL1	-0.726679	4.41236	-5.1104	1.18818e-05	0.000425321	3.0596
80319	CXXC4	1.07519	3.47038	5.10144	1.22064e-05	0.000434257	3.03337
5576	PRKAR2A	-0.299103	7.36655	-5.10131	1.22112e-05	0.000434257	3.03299
79026	AHNAK	-0.992579	4.65042	-5.10009	1.22564e-05	0.000434443	3.0294
493869	GPX8	3.32938	0.655536	5.09517	1.24389e-05	0.00043948	3.01502
7029	TFDP2	0.509877	7.1976	5.09331	1.25088e-05	0.000440522	3.00956
29121	CLEC2D	-0.410622	6.81926	-5.088	1.27102e-05	0.000446168	2.99403
9448	MAP4K4	0.471633	8.45501	5.08196	1.29432e-05	0.000452887	2.97636
139411	PTCHD1	-0.800806	3.41792	-5.0726	1.33129e-05	0.000464331	2.94896
1141	CHRNB2	0.742525	5.06077	5.06891	1.34611e-05	0.000468	2.9382
8941	CDK5R2	1.40148	4.18058	5.06766	1.35121e-05	0.000468276	2.93452
29941	PKN3	-1.07655	3.64124	-5.06296	1.37043e-05	0.000473431	2.92078
9705	ST18	4.24243	0.0292186	5.06174	1.37548e-05	0.000473671	2.9172
57447	NDRG2	0.614204	5.70947	5.05862	1.38843e-05	0.000476621	2.90809
28969	BZW2	0.36518	7.30509	5.05251	1.41416e-05	0.000483927	2.89024
55622	TTC27	-0.936624	3.61232	-5.04356	1.45273e-05	0.000495566	2.86407
5557	PRIM1	-0.676664	5.02957	-5.03455	1.49259e-05	0.000507575	2.83775
128414	NKAIN4	2.14634	1.13429	5.02423	1.53963e-05	0.000521939	2.80758
10681	GNB5	0.759375	3.54563	5.02249	1.5477e-05	0.000523044	2.8025
11340	EXOSC8	-0.779564	5.54521	-5.02	1.55933e-05	0.000525343	2.79522
56896	DPYSL5	0.679136	5.89459	5.01633	1.5766e-05	0.000528661	2.78451
91663	MYADM	0.547444	5.95077	5.01585	1.57889e-05	0.000528661	2.7831
5080	PAX6	2.62232	1.13691	5.00917	1.61088e-05	0.000537716	2.76361
5902	RANBP1	-0.373364	7.95282	-4.99488	1.68152e-05	0.000558395	2.72189
3094	HINT1	-0.516963	10.0742	-4.99457	1.68309e-05	0.000558395	2.72098
55355	HJURP	-0.45942	6.19064	-4.99102	1.70115e-05	0.000562674	2.7106
9133	CCNB2	-0.449004	6.92723	-4.98325	1.74127e-05	0.000574198	2.68795
56654	NPDC1	0.540322	5.69643	4.97391	1.79079e-05	0.000588742	2.6607
8503	PIK3R3	0.657179	7.25026	4.97109	1.80604e-05	0.000591966	2.65246
155066	ATP6V0E2	0.556576	5.7473	4.96431	1.84316e-05	0.000602322	2.63269
54332	GDAP1	0.428215	5.67463	4.96143	1.85912e-05	0.000605718	2.62431
51661	FKBP7	0.679608	4.6256	4.95441	1.89871e-05	0.000616768	2.60384
4141	MARS	-0.772536	7.11912	-4.9491	1.9292e-05	0.000623119	2.58836
3614	IMPDH1	-0.59784	4.95618	-4.94902	1.92971e-05	0.000623119	2.58811
6478	SIAH2	-0.610333	5.34222	-4.9469	1.94197e-05	0.000625223	2.58196
83931	STK40	-0.731837	5.2451	-4.93976	1.98405e-05	0.000636887	2.56113
2542	SLC37A4	-0.651145	4.42438	-4.93306	2.02434e-05	0.000646741	2.5416
80014	WWC2	0.71154	4.87956	4.93094	2.03725e-05	0.000646741	2.53543
79710	MORC4	-1.13382	3.3695	-4.93091	2.03743e-05	0.000646741	2.53534
1846	DUSP4	0.662434	5.53141	4.93073	2.03852e-05	0.000646741	2.53482
5994	RFXAP	-0.697247	4.13959	-4.92874	2.05073e-05	0.000648278	2.52902
2512	FTL	-0.429308	9.78123	-4.92762	2.05765e-05	0.000648278	2.52575
445	ASS1	-0.636312	8.57256	-4.92618	2.06654e-05	0.000648278	2.52156
23043	TNIK	0.765338	4.89007	4.92607	2.0672e-05	0.000648278	2.52125
8618	CADPS	1.43663	2.92	4.92167	2.09467e-05	0.000655005	2.50843
644068	RPS14P3	0.85692	6.88548	4.91943	2.10879e-05	0.000657533	2.5019
57688	ZSWIM6	0.493815	5.95273	4.91238	2.1538e-05	0.000669647	2.48139
126299	ZNF428	0.410621	8.81879	4.91131	2.16075e-05	0.000669894	2.47827
6328	SCN3A	1.49713	2.68797	4.90667	2.19098e-05	0.000673908	2.46477
51504	TRMT112	-0.401436	8.76875	-4.90659	2.19152e-05	0.000673908	2.46453
29109	FHOD1	-0.881244	5.37217	-4.90648	2.19228e-05	0.000673908	2.4642
9419	CRIPT	0.456917	5.69729	4.90507	2.20152e-05	0.000674844	2.46011
9546	APBA3	-0.544266	4.02526	-4.89524	2.26735e-05	0.000693069	2.4315
9839	ZEB2	0.718582	5.02113	4.88436	2.34249e-05	0.000714032	2.39985
7531	YWHAE	-0.283909	9.65894	-4.88136	2.36366e-05	0.000718472	2.39111
51761	ATP8A2	1.42558	2.54046	4.87415	2.41523e-05	0.000731213	2.37016
55653	BCAS4	-1.03595	3.05088	-4.87363	2.41901e-05	0.000731213	2.36864
481	ATP1B1	0.570971	8.15722	4.8707	2.44033e-05	0.000735614	2.36012
7422	VEGFA	-1.37525	5.30858	-4.86448	2.48623e-05	0.000745723	2.34203
23263	MCF2L	1.00268	3.71188	4.8643	2.48757e-05	0.000745723	2.34151
56940	DUSP22	1.26027	3.51243	4.86102	2.51208e-05	0.000751001	2.33199
102157402	AK6	-0.537676	5.57689	-4.85052	2.59231e-05	0.000772864	2.30148
64377	CHST8	1.48467	3.49458	4.84234	2.65658e-05	0.000788545	2.27771
113402	SFT2D1	-0.667234	4.172	-4.84199	2.6594e-05	0.000788545	2.27668
1650	DDOST	-0.528123	4.86199	-4.84001	2.67515e-05	0.000791059	2.27095
84628	NTNG2	2.53105	2.04232	4.8342	2.72212e-05	0.000801055	2.25406
56904	SH3GLB2	-0.524729	5.26072	-4.83346	2.72815e-05	0.000801055	2.25191
7976	FZD3	0.497316	6.60333	4.8331	2.73104e-05	0.000801055	2.25089
5998	RGS3	0.698161	3.95595	4.8286	2.76812e-05	0.000809749	2.2378
4664	NAB1	0.504859	4.88464	4.82354	2.81032e-05	0.00081989	2.22312
2896	GRN	0.500767	7.31102	4.81933	2.84594e-05	0.000826597	2.2109
1974	EIF4A2	0.700241	7.35839	4.81854	2.85265e-05	0.000826597	2.20861
23564	DDAH2	-0.773845	4.15926	-4.81814	2.8561e-05	0.000826597	2.20744
114971	PTPMT1	-0.49251	5.96232	-4.81718	2.86429e-05	0.00082677	2.20466
57494	RIMKLB	2.80159	1.86577	4.81356	2.89543e-05	0.000833546	2.19417
90293	KLHL13	-0.342486	7.04712	-4.81216	2.90758e-05	0.000834837	2.19011
100133941	CD24	0.408759	7.84319	4.80971	2.92896e-05	0.00083876	2.183
6678	SPARC	0.361599	7.48972	4.80868	2.93806e-05	0.00083916	2.17999
2030	SLC29A1	-0.495141	6.07675	-4.80699	2.95291e-05	0.000841192	2.1751
55384	MEG3	-1.57146	5.7625	-4.80455	2.97454e-05	0.000845142	2.16802
10079	ATP9A	0.639786	4.45233	4.80286	2.9896e-05	0.000847209	2.16312
1017	CDK2	-0.359202	6.88982	-4.79909	3.02345e-05	0.000854576	2.1522
51617	HMP19	1.22812	4.18552	4.78421	3.16096e-05	0.000891129	2.10906
6387	CXCL12	1.15763	4.31279	4.7818	3.18384e-05	0.000895259	2.10207
51474	LIMA1	0.497582	6.82234	4.77308	3.2679e-05	0.000916528	2.0768
23262	PPIP5K2	0.421196	5.63008	4.76649	3.33289e-05	0.000932353	2.0577
55226	NAT10	-0.523	6.75816	-4.76114	3.38654e-05	0.000944932	2.04222
9568	GABBR2	1.96975	2.35099	4.75686	3.43009e-05	0.000954634	2.02983
10459	MAD2L2	0.562074	5.5879	4.75185	3.48173e-05	0.000966536	2.01534
54741	LEPROT	0.429705	5.72453	4.74706	3.53196e-05	0.000976273	2.00145
10220	GDF11	0.521046	5.72844	4.74679	3.53475e-05	0.000976273	2.00069
10694	CCT8	-0.271212	8.83671	-4.72978	3.71882e-05	0.00102451	1.95148
6161	RPL32	0.370512	11.4961	4.72131	3.81397e-05	0.00104579	1.92699
83596	BCL2L12	-0.474308	5.99055	-4.7212	3.8153e-05	0.00104579	1.92666
53917	RAB24	-0.566356	4.69378	-4.71551	3.88058e-05	0.00106102	1.91021
2826	CCR10	-1.33295	2.91619	-4.71054	3.9385e-05	0.00107415	1.89586
57515	SERINC1	0.537899	6.55401	4.7067	3.98379e-05	0.00108379	1.88478
22929	SEPHS1	-0.354676	7.48291	-4.70481	4.00631e-05	0.0010872	1.87932
10409	BASP1	0.425015	9.45352	4.70238	4.03548e-05	0.00109239	1.87229
65264	UBE2Z	0.470529	6.71214	4.69869	4.08008e-05	0.00110172	1.86164
27087	B3GAT1	3.00501	0.0557045	4.69438	4.13283e-05	0.00111052	1.84919
175	AGA	-0.839844	4.19466	-4.69436	4.13308e-05	0.00111052	1.84913
51065	RPS27L	0.412207	7.65629	4.69298	4.1501e-05	0.00111235	1.84515
10097	ACTR2	0.374538	7.96102	4.68394	4.26342e-05	0.00113991	1.81905
1471	CST3	0.589441	6.1838	4.67968	4.3179e-05	0.00115165	1.80675
3642	INSM1	1.28399	4.99081	4.67773	4.34302e-05	0.00115552	1.80113
23032	USP33	0.377361	6.33164	4.67392	4.39262e-05	0.00116269	1.79014
9244	CRLF1	2.36543	0.908804	4.67332	4.40045e-05	0.00116269	1.78841
9911	TMCC2	0.624847	3.98181	4.67268	4.40882e-05	0.00116269	1.78657
84629	TNRC18	0.860948	4.23701	4.67239	4.41271e-05	0.00116269	1.78571
9188	DDX21	-0.330731	9.22587	-4.67116	4.42889e-05	0.00116413	1.78217
23462	HEY1	1.69992	4.09363	4.67006	4.44335e-05	0.00116464	1.77901
7046	TGFBR1	0.616035	5.32624	4.66939	4.45223e-05	0.00116464	1.77708
56992	KIF15	-0.552157	6.1831	-4.6678	4.47344e-05	0.00116739	1.77248
1649	DDIT3	-2.44493	3.24905	-4.66062	4.57004e-05	0.00118735	1.75178
230	ALDOC	-1.65432	5.34032	-4.66042	4.57276e-05	0.00118735	1.75121
29763	PACSIN3	-0.913663	4.5651	-4.65969	4.58269e-05	0.00118735	1.74911
9935	MAFB	1.32388	3.9133	4.65572	4.63718e-05	0.00119862	1.73766
10446	LRRN2	1.09951	2.76758	4.65434	4.65635e-05	0.00120072	1.73366
29097	CNIH4	-0.419342	7.55754	-4.65044	4.7107e-05	0.00120986	1.72243
56242	ZNF253	-2.33638	0.249502	-4.64995	4.71759e-05	0.00120986	1.72101
11149	BVES	0.863961	3.88554	4.64941	4.72516e-05	0.00120986	1.71946
7507	XPA	0.375883	5.77386	4.64666	4.7639e-05	0.00121692	1.71155
9139	CBFA2T2	0.544624	4.60729	4.64273	4.81998e-05	0.00122836	1.70022
55254	TMEM39A	-0.538805	4.33754	-4.62877	5.02429e-05	0.00127744	1.66003
151194	METTL21A	-0.589467	4.49699	-4.62247	5.11943e-05	0.00129859	1.64187
158763	ARHGAP36	0.974348	5.32122	4.62076	5.14541e-05	0.00130215	1.63697
6449	SGTA	0.983021	6.18411	4.61317	5.26282e-05	0.00132877	1.61513
163486	DENND1B	0.554475	4.5418	4.60713	5.35821e-05	0.00134972	1.59775
2631	GBAS	-0.333007	6.24898	-4.5988	5.49245e-05	0.0013796	1.5738
7095	SEC62	0.368569	8.25165	4.59821	5.50216e-05	0.0013796	1.57209
79646	PANK3	-0.524315	5.19576	-4.5968	5.52517e-05	0.00138218	1.56805
79094	CHAC1	-3.79136	4.41195	-4.59505	5.55395e-05	0.00138619	1.56303
400916	CHCHD10	-0.569371	6.07432	-4.59407	5.5702e-05	0.00138707	1.5602
441531	PGAM4	-0.598218	5.63606	-4.593	5.58795e-05	0.00138831	1.55712
80157	CWH43	-0.718542	4.9455	-4.58767	5.67705e-05	0.00140087	1.54181
351	APP	0.334221	8.0448	4.58762	5.67797e-05	0.00140087	1.54166
81849	ST6GALNAC5	0.967794	4.86341	4.58702	5.68804e-05	0.00140087	1.53994
10961	ERP29	-0.544369	7.42997	-4.5869	5.68997e-05	0.00140087	1.53961
10644	IGF2BP2	-0.460614	5.78829	-4.58028	5.80291e-05	0.00142545	1.5206
113246	C12orf57	0.452074	7.72444	4.57181	5.95081e-05	0.00145598	1.49625
1786	DNMT1	-0.468326	8.85925	-4.57123	5.96103e-05	0.00145598	1.49459
9353	SLIT2	1.1425	3.62445	4.57048	5.97428e-05	0.00145598	1.49244
84300	UQCC2	-0.658412	5.22183	-4.57012	5.98072e-05	0.00145598	1.4914
672	BRCA1	-0.407033	6.49076	-4.56747	6.02789e-05	0.00146419	1.4838
8544	PIR	-0.675971	4.92275	-4.56077	6.14892e-05	0.00149026	1.46457
7841	MOGS	-0.646978	5.01966	-4.55731	6.21232e-05	0.00150228	1.45465
283987	HID1	1.44446	2.47438	4.55617	6.23341e-05	0.00150403	1.45137
9902	MRC2	-0.820205	5.20919	-4.54985	6.35134e-05	0.0015291	1.43325
3835	KIF22	-0.416135	6.3778	-4.54437	6.45531e-05	0.0015507	1.41754
7353	UFD1L	-0.429869	6.67606	-4.54004	6.53866e-05	0.00156726	1.40514
1746	DLX2	3.32479	0.417323	4.53711	6.59583e-05	0.00157431	1.39672
25840	METTL7A	-0.886359	5.90266	-4.53699	6.59819e-05	0.00157431	1.39638
408	ARRB1	-0.645085	4.88522	-4.53631	6.61145e-05	0.00157431	1.39443
58190	CTDSP1	-0.547879	5.65136	-4.53487	6.63977e-05	0.0015776	1.3903
6541	SLC7A1	-0.970136	6.59009	-4.5313	6.71036e-05	0.0015909	1.38008
79660	PPP1R3B	-1.01381	3.80563	-4.52587	6.81918e-05	0.00161158	1.36452
8565	YARS	-0.842531	7.134	-4.52547	6.82724e-05	0.00161158	1.36338
284565	NBPF15	0.58149	5.42126	4.51968	6.94535e-05	0.00163591	1.3468
84283	TMEM79	-0.644731	4.5638	-4.5185	6.96957e-05	0.00163807	1.34344
203547	VMA21	-0.409965	7.20964	-4.51338	7.07616e-05	0.00165954	1.32877
3092	HIP1	-0.598039	4.21582	-4.50869	7.17508e-05	0.00167912	1.31535
9700	ESPL1	-0.571359	5.0612	-4.50681	7.21507e-05	0.00168486	1.30997
5329	PLAUR	-0.729084	4.63489	-4.50138	7.33203e-05	0.0017085	1.29443
8428	STK24	-0.381963	6.49632	-4.49819	7.40159e-05	0.00171786	1.28531
11321	GPN1	-0.385896	5.61912	-4.49784	7.40916e-05	0.00171786	1.28432
4172	MCM3	-0.384884	7.95457	-4.49737	7.41952e-05	0.00171786	1.28297
114805	GALNT13	0.386319	5.06353	4.49433	7.48667e-05	0.00172926	1.27426
10009	ZBTB33	0.360156	5.80813	4.4937	7.50057e-05	0.00172926	1.27247
122953	JDP2	-2.45225	2.95411	-4.49021	7.57843e-05	0.00174352	1.26249
54331	GNG2	0.575077	5.3052	4.48757	7.63788e-05	0.00175349	1.25494
2618	GART	-0.448639	5.84798	-4.4863	7.66652e-05	0.00175426	1.25133
586	BCAT1	-0.715383	8.39352	-4.48599	7.6735e-05	0.00175426	1.25045
4791	NFKB2	-1.0392	3.29811	-4.48509	7.694e-05	0.00175447	1.24787
90874	ZNF697	0.715983	4.00119	4.48454	7.70664e-05	0.00175447	1.24628
10150	MBNL2	0.784428	4.43163	4.48088	7.79033e-05	0.00176982	1.23585
5366	PMAIP1	-0.951078	6.43976	-4.47679	7.88524e-05	0.00178765	1.22415
3669	ISG20	-1.40272	2.51238	-4.47557	7.91369e-05	0.00179037	1.22067
9379	NRXN2	1.0913	3.63544	4.4742	7.94577e-05	0.0017939	1.21676
283731	LOC283731	2.05722	-0.564084	4.47064	8.02985e-05	0.00180913	1.20659
8202	NCOA3	0.47384	5.06206	4.46378	8.19442e-05	0.00184239	1.18699
5325	PLAGL1	0.950476	3.15983	4.46205	8.23641e-05	0.00184801	1.18206
153733	CCDC112	0.39381	6.76689	4.45825	8.32922e-05	0.00186479	1.17123
468	ATF4	-1.05117	8.97354	-4.45759	8.34547e-05	0.00186479	1.16935
23180	RFTN1	0.60837	4.72928	4.45618	8.38054e-05	0.00186879	1.1653
55627	SMPD4	-0.586649	6.95063	-4.45491	8.41192e-05	0.00186914	1.16169
51659	GINS2	-0.68939	5.30748	-4.45473	8.41646e-05	0.00186914	1.16117
23020	SNRNP200	-0.277148	8.089	-4.45266	8.46794e-05	0.00187674	1.15528
51804	SIX4	0.601335	3.73448	4.4483	8.57763e-05	0.00189719	1.14285
64682	ANAPC1	-0.463872	5.19941	-4.43458	8.93231e-05	0.00196704	1.10373
54555	DDX49	0.416667	5.58762	4.43428	8.94014e-05	0.00196704	1.10288
133584	EGFLAM	1.472	3.02927	4.434	8.94768e-05	0.00196704	1.10207
1000	CDH2	0.49576	7.90556	4.43042	9.04259e-05	0.0019839	1.09188
7916	PRRC2A	0.850759	4.75431	4.42768	9.11611e-05	0.00199601	1.08406
55081	IFT57	0.411081	6.44709	4.42699	9.13451e-05	0.00199602	1.08212
83451	ABHD11	-0.879128	2.54378	-4.42564	9.17112e-05	0.002	1.07825
1855	DVL1	-0.622102	5.40173	-4.42481	9.19361e-05	0.0020009	1.07589
119559	SFXN4	-0.383931	6.30955	-4.42366	9.22479e-05	0.00200103	1.07262
7323	UBE2D3	-0.25429	9.01304	-4.42276	9.24934e-05	0.00200103	1.07006
23405	DICER1	0.464748	7.00725	4.42276	9.24939e-05	0.00200103	1.07005
64946	CENPH	-0.639694	5.76195	-4.41737	9.39761e-05	0.00202569	1.0547
4704	NDUFA9	0.395702	7.26134	4.41726	9.40059e-05	0.00202569	1.0544
256987	SERINC5	-1.15003	2.93551	-4.41577	9.44201e-05	0.00202935	1.05015
441212	RP9P	-0.551339	4.47858	-4.41531	9.45489e-05	0.00202935	1.04884
51022	GLRX2	-0.611535	5.06619	-4.41203	9.54669e-05	0.00204502	1.03951
283120	H19	-1.70852	4.92676	-4.41033	9.59471e-05	0.00205127	1.03467
2956	MSH6	-0.309967	7.72477	-4.40576	9.72463e-05	0.00207497	1.02169
60681	FKBP10	0.539403	7.15326	4.40447	9.76191e-05	0.00207605	1.018
4487	MSX1	0.993886	3.66545	4.40426	9.76784e-05	0.00207605	1.01741
6616	SNAP25	0.751393	4.08191	4.40199	9.8334e-05	0.00208591	1.01095
6233	RPS27A	-0.435586	11.5567	-4.40019	9.8856e-05	0.0020929	1.00584
27086	FOXP1	0.302691	6.96815	4.39332	0.000100879	0.00213157	0.986301
54462	CCSER2	0.373679	5.08498	4.38849	0.000102324	0.00215792	0.972575
9131	AIFM1	-0.368016	5.82271	-4.3863	0.000102985	0.00216766	0.966362
1942	EFNA1	0.828159	3.76911	4.38357	0.000103816	0.00218094	0.958605
10614	HEXIM1	0.494352	5.74338	4.37574	0.000106237	0.00222415	0.936371
170688	NUDT4P2	-0.604089	4.53678	-4.37551	0.00010631	0.00222415	0.935708
4756	NEO1	0.429788	5.97578	4.37495	0.000106486	0.00222415	0.934106
3675	ITGA3	1.12506	2.30749	4.37233	0.000107309	0.00223705	0.926679
60491	NIF3L1	-0.492366	5.56598	-4.37132	0.00010763	0.00223944	0.923802
554282	FAM72C	-0.680278	6.20324	-4.36504	0.000109636	0.00227479	0.905987
284058	KANSL1	0.444239	5.07313	4.3647	0.000109747	0.00227479	0.905014
10498	CARM1	-0.412433	6.92691	-4.36171	0.000110714	0.00228839	0.896549
25923	ATL3	-0.666422	4.29438	-4.36138	0.000110824	0.00228839	0.895599
57622	LRFN1	0.962252	4.64286	4.3571	0.000112228	0.00231301	0.88345
1271	CNTFR	0.658426	5.48153	4.35392	0.000113281	0.00233029	0.874449
11020	IFT27	0.47018	5.05601	4.35172	0.000114017	0.002341	0.868206
27131	SNX5	-0.289181	6.96836	-4.34738	0.00011548	0.00236657	0.85591
80003	PCNX2	0.676152	4.86302	4.344	0.000116634	0.00238371	0.84632
63827	BCAN	1.16071	3.18595	4.34365	0.000116754	0.00238371	0.84533
283464	GXYLT1	-0.483347	5.97248	-4.34096	0.000117679	0.00239402	0.837718
54539	NDUFB11	0.305707	8.32244	4.34091	0.000117699	0.00239402	0.837557
6120	RPE	-0.985533	2.51285	-4.3387	0.000118462	0.00240505	0.831324
23616	SH3BP1	-0.614388	4.79783	-4.3378	0.000118778	0.00240696	0.828761
55534	MAML3	0.542198	4.68865	4.33502	0.00011975	0.00242061	0.820901
6652	SORD	-0.753864	3.97233	-4.33461	0.000119896	0.00242061	0.819726
79038	ZFYVE21	-0.53753	4.79834	-4.3338	0.000120181	0.00242188	0.817435
139886	SPIN4	-0.580963	6.03501	-4.33314	0.000120416	0.00242212	0.815555
56947	MFF	-0.310186	6.71618	-4.32803	0.000122236	0.00245419	0.801096
51564	HDAC7	-0.582741	7.51956	-4.32736	0.000122477	0.0024545	0.799195
1719	DHFR	-0.297785	8.53754	-4.32574	0.00012306	0.00246165	0.794618
10916	MAGED2	0.441803	6.98192	4.32412	0.000123647	0.00246885	0.790035
3207	HOXA11	2.30958	-1.01946	4.31847	0.000125714	0.00250202	0.774053
57600	FNIP2	0.427681	6.15502	4.31833	0.000125768	0.00250202	0.773639
57178	ZMIZ1	0.451434	6.83437	4.31515	0.000126948	0.00251757	0.764639
7700	ZNF141	0.489978	8.50776	4.31497	0.000127012	0.00251757	0.764151
3927	LASP1	-0.453798	6.81706	-4.31167	0.000128248	0.00253566	0.754817
9825	SPATA2	-0.547349	4.00758	-4.31129	0.000128391	0.00253566	0.753746
3020	H3F3A	0.362778	8.12279	4.30564	0.00013054	0.00257132	0.73775
1602	DACH1	0.314701	7.41237	4.3053	0.000130669	0.00257132	0.736798
55143	CDCA8	-0.356292	6.98956	-4.30109	0.000132291	0.00259693	0.724911
6659	SOX4	0.455822	9.72863	4.30069	0.000132448	0.00259693	0.723768
6119	RPA3	-0.409627	6.14529	-4.29804	0.000133481	0.00260818	0.716284
112574	SNX18	0.652388	4.57386	4.29799	0.000133501	0.00260818	0.716137
3843	IPO5	-0.357203	7.63296	-4.29379	0.000135154	0.00263297	0.704284
55623	THUMPD1	0.40769	6.22005	4.29354	0.000135254	0.00263297	0.70357
80824	DUSP16	-0.562259	5.03241	-4.2899	0.000136704	0.00265646	0.693293
7171	TPM4	-0.3453	7.56156	-4.28841	0.000137302	0.00266332	0.68909
138311	FAM69B	-0.485888	5.59833	-4.2878	0.000137549	0.00266336	0.68736
7453	WARS	-0.530784	8.34113	-4.28209	0.00013987	0.00270349	0.671242
84079	ANKRD27	-0.726638	4.43579	-4.28035	0.000140583	0.00271245	0.666344
476	ATP1A1	0.496903	8.21632	4.27725	0.000141866	0.00273236	0.657595
541471	MIR4435-2HG	-0.752361	5.15373	-4.2744	0.000143057	0.00274988	0.649541
79073	TMEM109	-0.531146	6.24805	-4.27386	0.000143281	0.00274988	0.648036
8208	CHAF1B	-0.595406	4.33889	-4.27171	0.000144186	0.00275878	0.641971
8761	PABPC4	0.342525	8.22786	4.27156	0.000144252	0.00275878	0.641531
287	ANK2	0.613709	4.80397	4.26966	0.000145053	0.00276261	0.6362
10732	TCFL5	-0.467621	4.38839	-4.26918	0.000145259	0.00276261	0.634831
440	ASNS	-1.78129	6.31674	-4.26879	0.000145423	0.00276261	0.633741
3949	LDLR	-0.660472	7.15057	-4.26869	0.000145467	0.00276261	0.633451
6016	RIT1	-0.359654	5.54123	-4.2669	0.000146231	0.00276805	0.62841
467	ATF3	-1.9992	3.15498	-4.26683	0.000146263	0.00276805	0.6282
367	AR	1.88267	1.00471	4.26482	0.000147122	0.00277949	0.622556
10970	CKAP4	0.415796	8.35765	4.26393	0.000147506	0.00278191	0.620046
8848	TSC22D1	0.451941	6.08835	4.26312	0.00014786	0.00278376	0.61774
1265	CNN2	-0.657177	4.99424	-4.26142	0.000148594	0.00279275	0.612971
54149	C21orf91	0.529554	5.06376	4.25928	0.000149531	0.00280203	0.606922
25886	POC1A	-0.615967	4.62601	-4.25911	0.000149603	0.00280203	0.606455
6626	SNRPA	-0.292137	7.06416	-4.25849	0.000149877	0.00280234	0.604693
23275	POFUT2	-0.60287	3.63902	-4.25487	0.000151472	0.00282731	0.594498
10402	ST3GAL6	-0.621925	5.32809	-4.25327	0.000152183	0.00283571	0.589992
55783	CMTR2	0.695667	2.89314	4.25118	0.000153116	0.00284822	0.584108
5817	PVR	0.55597	5.53277	4.24863	0.00015426	0.0028646	0.576944
23543	RBFOX2	0.290342	7.53309	4.24304	0.000156803	0.00290687	0.5612
22950	SLC4A1AP	-0.33093	6.65573	-4.23889	0.000158716	0.00293733	0.549528
57132	CHMP1B	0.722707	4.38109	4.23739	0.000159417	0.00294529	0.545288
10099	TSPAN3	0.316358	8.1792	4.23671	0.000159731	0.00294609	0.543393
252995	FNDC5	0.654483	6.52288	4.23602	0.000160053	0.00294704	0.541454
51621	KLF13	0.453659	4.64085	4.23361	0.000161186	0.00296288	0.534667
4038	LRP4	-0.82214	4.17588	-4.22995	0.000162921	0.00298972	0.524365
8798	DYRK4	0.575235	4.32841	4.22749	0.000164096	0.00300621	0.51745
56255	TMX4	0.489957	7.29349	4.22487	0.000165353	0.00302416	0.510101
83879	CDCA7	-0.470766	6.03277	-4.22171	0.00016689	0.00304577	0.501203
54780	NSMCE4A	-0.418145	5.90007	-4.22129	0.000167095	0.00304577	0.500021
51390	AIG1	0.497435	4.58218	4.20992	0.000172733	0.00314329	0.468089
22836	RHOBTB3	0.329736	8.19886	4.20155	0.000177004	0.00321367	0.444593
57549	IGSF9	0.858175	6.08619	4.2009	0.000177336	0.00321367	0.44279
1606	DGKA	-0.857599	3.521	-4.20061	0.000177487	0.00321367	0.441974
10058	ABCB6	-0.493794	5.93153	-4.19785	0.000178922	0.00323426	0.43423
1613	DAPK3	0.832356	4.23993	4.19494	0.000180446	0.00325641	0.426069
84668	FAM126A	0.457065	4.44838	4.19228	0.000181851	0.00327634	0.418609
59338	PLEKHA1	0.463798	5.39584	4.19074	0.000182673	0.00328569	0.414275
1879	EBF1	0.465364	5.20642	4.18829	0.000183979	0.00330122	0.407424
9212	AURKB	-0.438368	7.24318	-4.18799	0.000184143	0.00330122	0.406566
1876	E2F6	-0.45668	5.9941	-4.18734	0.000184492	0.00330204	0.404745
83862	TMEM120A	-0.755341	3.83382	-4.18166	0.00018757	0.00335161	0.388836
10051	SMC4	-0.374963	9.85576	-4.17919	0.000188927	0.00337033	0.381902
9521	EEF1E1	-0.526158	5.10066	-4.1767	0.000190298	0.00338924	0.374949
7582	ZNF33B	0.608212	4.7284	4.17531	0.000191072	0.00339746	0.371047
23549	DNPEP	-0.601722	5.67886	-4.17382	0.000191903	0.00340646	0.366876
1026	CDKN1A	0.755016	6.35764	4.17328	0.000192204	0.00340646	0.365367
79713	IGFLR1	-0.896514	3.33128	-4.16663	0.000195964	0.00346744	0.346745
150468	CKAP2L	-0.360612	6.71582	-4.16485	0.000196983	0.00347981	0.34176
84913	ATOH8	0.826931	5.16461	4.1619	0.000198682	0.00350415	0.333501
9401	RECQL4	-0.529528	5.91395	-4.15915	0.000200276	0.00352654	0.325823
84634	KISS1R	2.09751	0.716324	4.15768	0.000201135	0.00353594	0.32171
195828	ZNF367	-0.752155	4.37456	-4.14954	0.000205957	0.00361487	0.29894
29796	UQCR10	0.363514	7.49022	4.1479	0.000206938	0.00362045	0.294374
1820	ARID3A	-0.60214	4.91175	-4.1479	0.00020694	0.00362045	0.294363
8089	YEATS4	-0.405952	6.70191	-4.14614	0.000208	0.00363315	0.289455
64743	WDR13	0.51224	4.80158	4.14495	0.000208721	0.0036399	0.286129
11104	KATNA1	-0.48196	6.06368	-4.14257	0.000210171	0.00365797	0.279476
4832	NME3	-0.71196	3.75702	-4.14161	0.000210761	0.00365797	0.276783
4814	NINJ1	-1.0012	3.49803	-4.1416	0.000210765	0.00365797	0.276763
2122	MECOM	2.21376	2.39847	4.14069	0.000211321	0.00365821	0.274233
8914	TIMELESS	-0.336769	6.56902	-4.14048	0.000211451	0.00365821	0.273641
55080	TAPBPL	-1.03208	2.29087	-4.13467	0.000215052	0.00371461	0.257415
5110	PCMT1	-0.255041	7.24511	-4.1321	0.000216666	0.00373655	0.250234
6586	SLIT3	0.423631	6.71274	4.13036	0.000217761	0.00374948	0.245392
221035	REEP3	0.446266	5.39332	4.12838	0.000219018	0.00376355	0.239861
55859	BEX1	0.345138	8.92068	4.12749	0.000219585	0.00376355	0.237377
10904	BLCAP	0.508852	5.17089	4.12744	0.000219615	0.00376355	0.237246
84872	ZC3H10	-0.840237	2.91736	-4.12523	0.000221029	0.00378182	0.231082
4799	NFX1	-0.29732	6.14609	-4.12366	0.000222042	0.00378788	0.226688
90843	TCEAL8	0.387862	7.18674	4.1236	0.000222079	0.00378788	0.226528
389856	USP27X	0.781791	3.01316	4.11994	0.000224453	0.00382209	0.216315
57502	NLGN4X	0.814622	4.79283	4.11943	0.000224788	0.00382209	0.214885
22	ABCB7	-0.412402	5.41492	-4.11634	0.000226808	0.00385043	0.20629
3939	LDHA	-0.805723	6.74826	-4.11439	0.000228096	0.00386626	0.200853
116224	FAM122A	0.838002	3.44868	4.11377	0.00022851	0.00386726	0.19911
9586	CREB5	1.09839	3.43368	4.11175	0.000229853	0.00388327	0.193485
342035	GLDN	2.61946	0.461188	4.11127	0.00023017	0.00388327	0.192161
201475	RAB12	-0.459296	5.21174	-4.1103	0.000230822	0.00388825	0.189443
9411	ARHGAP29	1.04711	3.07911	4.10938	0.000231439	0.00389261	0.186881
645206	LINC00693	1.49611	1.91729	4.10882	0.000231816	0.00389294	0.185316
636	BICD1	0.525121	5.31688	4.10583	0.000233835	0.00392079	0.17699
8440	NCK2	0.45147	5.34493	4.10022	0.000237671	0.00397898	0.161366
104472717	LINC01224	-0.628769	3.45352	-4.09925	0.00023834	0.00398405	0.158669
10036	CHAF1A	-0.419591	6.90767	-4.09798	0.000239219	0.00399261	0.155133
79085	SLC25A23	0.484325	5.18649	4.09179	0.000243546	0.00405105	0.137924
5784	PTPN14	-0.882484	3.95066	-4.09144	0.000243794	0.00405105	0.136946
2192	FBLN1	-0.44371	6.52942	-4.09138	0.000243837	0.00405105	0.136777
348995	NUP43	-0.307361	6.60463	-4.09013	0.000244724	0.00405958	0.133293
833	CARS	-1.14397	4.71235	-4.08735	0.000246703	0.00408618	0.125561
6861	SYT5	1.29504	2.75473	4.08572	0.000247869	0.00409926	0.121035
92	ACVR2A	0.546127	3.76682	4.08155	0.000250885	0.00413709	0.109426
57110	HRASLS	-1.20489	4.51906	-4.0815	0.000250917	0.00413709	0.109305
3480	IGF1R	0.433302	6.62402	4.07663	0.000254483	0.00418954	0.0957609
729177	NBAT1	1.15678	2.5794	4.07566	0.000255198	0.00419497	0.0930672
384	ARG2	-0.858142	4.30542	-4.07482	0.000255818	0.00419582	0.0907393
55764	IFT122	-0.526967	3.77078	-4.07455	0.000256021	0.00419582	0.089978
8140	SLC7A5	-1.37968	5.78887	-4.07144	0.000258331	0.00422731	0.0813585
5327	PLAT	-0.941057	3.98156	-4.07026	0.000259218	0.00423545	0.0780693
1136	CHRNA3	0.472724	8.18318	4.06829	0.000260702	0.0042533	0.072594
642852	LOC642852	0.385854	5.18616	4.06574	0.000262632	0.00427838	0.0655165
91433	RCCD1	-0.470802	5.6737	-4.06421	0.000263793	0.00429087	0.0612842
22924	MAPRE3	0.686639	3.95563	4.06041	0.000266715	0.00433193	0.0507145
6611	SMS	-0.295637	8.51737	-4.05709	0.000269288	0.0043635	0.0415047
9334	B4GALT5	-1.01898	3.1359	-4.05686	0.000269461	0.0043635	0.0408875
7132	TNFRSF1A	-0.55626	4.83825	-4.05615	0.000270018	0.00436603	0.0389055
94005	PIGS	-0.370629	6.52013	-4.0553	0.000270681	0.00437026	0.0365528
114908	TMEM123	0.53387	6.06915	4.05178	0.000273454	0.00440401	0.026776
3145	HMBS	-0.587271	4.3536	-4.05162	0.000273581	0.00440401	0.0263298
8894	EIF2S2	-0.662947	9.39965	-4.05092	0.000274129	0.00440631	0.0244115
7127	TNFAIP2	-1.58463	2.30402	-4.0497	0.000275102	0.00441542	0.0210144
3836	KPNA1	0.32022	5.96245	4.04871	0.000275891	0.00442158	0.0182651
2114	ETS2	0.41078	5.35971	4.03733	0.000285107	0.00456254	-0.0132449
23632	CA14	-0.994836	3.13029	-4.03394	0.000287911	0.00460066	-0.0226319
7138	TNNT1	1.31958	3.55046	4.03149	0.00028996	0.00462661	-0.0294325
9735	KNTC1	-0.547368	4.90116	-4.03043	0.00029085	0.00463156	-0.0323694
4677	NARS	-0.459652	7.58295	-4.02973	0.000291431	0.00463156	-0.0342842
51306	FAM13B	1.12411	3.49641	4.0296	0.000291548	0.00463156	-0.0346663
89849	ATG16L2	-0.694103	3.93866	-4.02874	0.000292266	0.00463621	-0.0370266
64170	CARD9	-0.835096	3.30477	-4.0247	0.0002957	0.0046822	-0.0482266
113730	KLHDC7B	-2.67978	-0.336982	-4.02431	0.000296026	0.0046822	-0.0492812
92691	TMEM169	0.735251	4.33878	4.02325	0.000296936	0.00468388	-0.0522248
257194	NEGR1	0.803722	3.23441	4.02318	0.000296993	0.00468388	-0.0524085
3099	HK2	-0.532481	6.42009	-4.01919	0.000300434	0.00473129	-0.06345
81876	RAB1B	0.580129	4.51059	4.01779	0.000301649	0.00474356	-0.0673203
2683	B4GALT1	-0.728996	5.27803	-4.01319	0.000305677	0.00479144	-0.0800353
4780	NFE2L2	-0.516142	7.23676	-4.01289	0.000305939	0.00479144	-0.080856
202181	LOC202181	2.02843	0.660511	4.01281	0.000306015	0.00479144	-0.0810927
8697	CDC23	-0.366821	5.60922	-4.0118	0.000306908	0.00479853	-0.083887
25996	REXO2	-0.448654	5.55347	-4.00971	0.000308761	0.00482056	-0.0896546
51660	MPC1	0.38348	5.86887	4.00697	0.000311205	0.00484605	-0.0972128
11259	FILIP1L	1.30822	3.03406	4.00689	0.000311283	0.00484605	-0.0974535
10579	TACC2	0.56215	4.15	4.00317	0.000314633	0.0048812	-0.107711
55215	FANCI	-0.436216	5.26215	-4.003	0.000314787	0.0048812	-0.10818
2653	GCSH	-0.641035	3.73061	-4.00289	0.000314887	0.0048812	-0.108484
26153	KIF26A	-0.45715	6.87288	-4.00153	0.000316125	0.00488434	-0.112245
388931	MFSD2B	-0.64954	5.49783	-4.00122	0.000316407	0.00488434	-0.113099
10403	NDC80	-0.349478	6.38941	-4.00119	0.000316437	0.00488434	-0.113188
7059	THBS3	0.447906	5.52886	3.99801	0.000319352	0.00492236	-0.121974
84236	RHBDD1	-0.738448	3.46622	-3.99615	0.000321064	0.00493591	-0.127098
10131	TRAP1	-0.396057	6.29712	-3.99601	0.000321196	0.00493591	-0.127493
23014	FBXO21	0.421208	6.24041	3.99558	0.000321592	0.00493591	-0.128672
5453	POU3F1	1.59093	1.9505	3.99183	0.000325078	0.00497554	-0.139002
6907	TBL1X	-0.466234	6.88101	-3.99182	0.000325088	0.00497554	-0.139033
5432	POLR2C	-0.401922	6.29977	-3.99057	0.000326263	0.00498651	-0.142488
79095	C9orf16	0.873838	4.17557	3.98929	0.000327472	0.00499797	-0.146032
50512	PODXL2	0.690073	4.73242	3.98583	0.000330749	0.00503695	-0.155569
6520	SLC3A2	-1.25262	6.92775	-3.98561	0.000330952	0.00503695	-0.156158
7741	ZSCAN26	-0.662618	2.93839	-3.97954	0.000336787	0.0051186	-0.1729
10410	IFITM3	-0.939677	5.34785	-3.97653	0.000339715	0.0051527	-0.18119
284217	LAMA1	-0.791123	2.8676	-3.97555	0.000340673	0.0051527	-0.183887
4174	MCM5	-0.389623	6.60758	-3.97544	0.000340779	0.0051527	-0.184185
440498	HSBP1L1	-0.715761	3.70692	-3.97499	0.000341218	0.0051527	-0.185417
89944	GLB1L2	1.61578	2.19361	3.97481	0.000341398	0.0051527	-0.185924
6530	SLC6A2	0.704533	5.59665	3.9733	0.000342889	0.0051629	-0.190097
642	BLMH	-0.361461	7.00559	-3.97284	0.000343335	0.0051629	-0.19134
2936	GSR	-0.401956	6.50883	-3.97268	0.000343498	0.0051629	-0.191795
5818	NECTIN1	0.687548	4.83234	3.96853	0.000347617	0.00521761	-0.20321
93474	ZNF670	-0.548599	4.2617	-3.96449	0.000351675	0.00526977	-0.214323
6645	SNTB2	-0.557762	4.83661	-3.96411	0.000352061	0.00526977	-0.215374
29980	DONSON	-0.429235	5.01183	-3.9634	0.000352785	0.00527337	-0.217342
10392	NOD1	-0.844711	3.08698	-3.96096	0.000355263	0.00530312	-0.224044
79064	TMEM223	-0.494563	4.66511	-3.96024	0.000356005	0.00530691	-0.22604
10929	SRSF8	0.43666	6.23072	3.95843	0.000357861	0.00532728	-0.231019
6472	SHMT2	-0.79942	6.96461	-3.95375	0.000362695	0.00539187	-0.243865
29942	PURG	-0.557218	3.09316	-3.95011	0.000366504	0.00544106	-0.253865
9672	SDC3	0.999374	3.44991	3.94675	0.000370064	0.00548642	-0.263117
115416	MALSU1	-0.383067	6.08125	-3.94448	0.000372483	0.00550793	-0.269354
54386	TERF2IP	0.36711	7.80688	3.94444	0.000372527	0.00550793	-0.269466
92815	HIST3H2A	1.09172	2.67282	3.94181	0.000375347	0.0055421	-0.276684
7153	TOP2A	-0.392416	10.7687	-3.94119	0.000376013	0.0055444	-0.27838
6877	TAF5	-0.512981	5.05301	-3.94045	0.000376806	0.00554859	-0.280398
221908	PPP1R35	-0.46424	4.5249	-3.93886	0.000378533	0.00556648	-0.284772
54877	ZCCHC2	0.755344	3.89195	3.93746	0.00038006	0.00558139	-0.288626
27333	GOLIM4	0.410533	7.96461	3.93164	0.000386451	0.0056676	-0.304583
23511	NUP188	-0.418473	6.44691	-3.92921	0.000389154	0.00569502	-0.311253
286467	FIRRE	1.28957	2.42761	3.92877	0.000389649	0.00569502	-0.312468
51101	ZC2HC1A	0.428096	6.03873	3.92855	0.00038989	0.00569502	-0.31306
4998	ORC1	-0.488333	4.76631	-3.92492	0.000393973	0.00574694	-0.323027
51678	MPP6	0.301989	5.87086	3.92353	0.000395537	0.00576202	-0.326816
55591	VEZT	0.269083	6.88206	3.92101	0.000398403	0.00579602	-0.333723
55344	PLCXD1	-0.861647	4.47041	-3.92053	0.00039896	0.00579637	-0.33506
6294	SAFB	0.540034	6.04307	3.91945	0.000400194	0.00580655	-0.338014
729739	LOC729739	-0.487829	6.50894	-3.9184	0.0004014	0.0058163	-0.340893
9688	NUP93	-0.320046	7.51641	-3.91414	0.00040633	0.00587989	-0.352568
57696	DDX55	-0.36759	6.48527	-3.91357	0.000406986	0.00588157	-0.354112
222161	DKFZP586I1420	0.816611	2.63131	3.9113	0.000409644	0.00591213	-0.360338
9168	TMSB10	0.497075	10.3643	3.90785	0.000413701	0.00596277	-0.369762
10465	PPIH	-0.340989	6.14994	-3.90657	0.000415223	0.00597679	-0.373274
8613	PLPP3	0.532607	5.05202	3.90586	0.000416075	0.00598114	-0.375234
23214	XPO6	-0.341191	6.61909	-3.90321	0.000419237	0.00601866	-0.382475
2189	FANCG	-0.439066	5.78586	-3.89923	0.000424041	0.00607164	-0.393368
10413	YAP1	-0.883425	3.44866	-3.89922	0.000424044	0.00607164	-0.393375
79017	GGCT	-0.360527	7.13868	-3.89481	0.000429435	0.00613982	-0.405454
6605	SMARCE1	0.290284	8.1721	3.8944	0.000429934	0.00613982	-0.406565
51569	UFM1	0.340725	5.7406	3.89354	0.000430998	0.00614695	-0.408928
8324	FZD7	0.995329	3.2833	3.89301	0.000431651	0.00614821	-0.410376
10140	TOB1	0.631856	4.79294	3.8918	0.000433144	0.0061614	-0.413676
7001	PRDX2	0.450791	7.74389	3.88832	0.000437466	0.00621475	-0.423166
90353	CTU1	0.90003	2.997	3.88563	0.00044084	0.00625329	-0.430512
23530	NNT	0.344471	5.18309	3.88525	0.000441328	0.00625329	-0.431568
6004	RGS16	0.898129	6.87372	3.88326	0.000443841	0.00628072	-0.436995
54674	LRRN3	1.64669	3.2545	3.88103	0.000446674	0.0063126	-0.443076
3281	HSBP1	0.302339	7.97128	3.87765	0.000451007	0.00636558	-0.452305
168544	ZNF467	1.15527	2.39517	3.87665	0.000452299	0.00637554	-0.455037
284119	PTRF	2.37661	1.52617	3.8749	0.000454572	0.0063993	-0.459829
55706	NDC1	-0.314886	6.52981	-3.87396	0.000455782	0.00640803	-0.462368
124540	MSI2	0.369749	7.01091	3.87211	0.000458204	0.00643378	-0.467433
2487	FRZB	-1.02332	3.92317	-3.86715	0.000464737	0.0065171	-0.48096
3084	NRG1	-0.675488	3.52189	-3.86509	0.00046747	0.00654698	-0.486562
4045	LSAMP	0.564168	5.603	3.86447	0.000468305	0.00655025	-0.488267
143686	SESN3	0.562931	7.20033	3.86204	0.000471552	0.00658721	-0.494869
90007	MIDN	0.519477	8.31489	3.8601	0.00047417	0.00661528	-0.500158
645	BLVRB	-0.669399	4.20382	-3.8562	0.000479471	0.00668066	-0.510777
6878	TAF6	-0.560383	4.63593	-3.85554	0.000480384	0.00668483	-0.512594
4571	TRNP	1.30588	6.04006	3.85461	0.000481651	0.0066939	-0.51511
347735	SERINC2	0.725115	3.98392	3.85162	0.000485775	0.00674261	-0.523255
3202	HOXA5	2.04983	-0.583409	3.84969	0.000488449	0.00677109	-0.528497
5985	RFC5	-0.367646	5.70403	-3.84881	0.000489682	0.00677954	-0.530905
79140	CCDC28B	-0.85751	2.69847	-3.84686	0.000492407	0.00680861	-0.536205
2495	FTH1	-0.279099	9.27575	-3.84349	0.000497156	0.00686555	-0.545371
57835	SLC4A5	-0.957318	4.53844	-3.84235	0.000498772	0.00687913	-0.548469
9709	HERPUD1	-1.18678	5.60963	-3.84157	0.000499879	0.00688568	-0.550587
55250	ELP2	-0.37919	5.53601	-3.84041	0.000501536	0.00689976	-0.553746
79929	MAP6D1	-0.861602	3.01879	-3.83886	0.000503752	0.00692074	-0.557957
54874	FNBP1L	0.500898	5.82441	3.83846	0.000504333	0.00692074	-0.559056
3161	HMMR	-0.490794	5.97988	-3.838	0.000504997	0.00692106	-0.560312
22920	KIFAP3	0.451176	5.75915	3.83756	0.000505628	0.00692106	-0.561505
92610	TIFA	0.952955	3.42864	3.83513	0.000509136	0.00695181	-0.568106
5978	REST	-0.439997	6.26205	-3.83512	0.000509152	0.00695181	-0.568136
64855	FAM129B	-0.600465	4.8361	-3.83291	0.000512357	0.00698571	-0.574127
55166	CENPQ	-0.457581	5.18308	-3.83253	0.000512919	0.00698571	-0.575174
171017	ZNF384	0.787694	3.77055	3.83133	0.000514666	0.00700075	-0.578421
619208	FAM229B	0.55777	4.40007	3.82979	0.000516933	0.0070228	-0.582616
83643	CCDC3	0.544916	5.29891	3.8285	0.000518831	0.0070398	-0.586115
2027	ENO3	-0.603117	4.79548	-3.8266	0.000521634	0.00706653	-0.591258
84311	MRPL45	-0.507528	5.24641	-3.82618	0.000522262	0.00706653	-0.592406
1534	CYB561	-2.03775	3.9859	-3.82585	0.000522749	0.00706653	-0.593296
25796	PGLS	0.457951	4.83249	3.82499	0.000524032	0.00706855	-0.595636
2887	GRB10	-0.960313	4.91435	-3.82488	0.000524198	0.00706855	-0.595938
2617	GARS	-0.957484	8.05931	-3.82267	0.000527497	0.00710423	-0.601926
150465	TTL	-0.330869	7.04969	-3.81865	0.00053356	0.007177	-0.612833
10827	FAM114A2	0.454664	4.50879	3.81762	0.000535133	0.00718928	-0.615643
3397	ID1	0.863157	6.51333	3.81567	0.000538108	0.00722033	-0.620933
781	CACNA2D1	0.645235	4.31581	3.81468	0.000539616	0.00723165	-0.623604
401115	C4orf48	0.628845	4.92367	3.81174	0.000544149	0.00728343	-0.631587
23016	EXOSC7	-0.397928	5.56377	-3.8101	0.000546689	0.00730844	-0.636031
9901	SRGAP3	0.907104	2.42288	3.80912	0.000548207	0.00731576	-0.638677
8323	FZD6	0.9435	2.33366	3.80888	0.000548581	0.00731576	-0.639328
2878	GPX3	-0.588462	3.99412	-3.80811	0.000549779	0.00732255	-0.641409
23329	TBC1D30	1.58647	2.10142	3.80738	0.000550926	0.00732255	-0.643397
5796	PTPRK	0.571568	4.31554	3.80721	0.000551198	0.00732255	-0.643869
9675	TTI1	-0.414054	5.65077	-3.80683	0.000551782	0.00732255	-0.644879
199731	CADM4	0.993537	3.59359	3.80577	0.000553446	0.00733569	-0.647751
219927	MRPL21	-0.358882	8.04142	-3.80343	0.00055714	0.00737567	-0.654098
282809	POC1B	-0.685523	4.34787	-3.803	0.000557819	0.00737569	-0.655261
23568	ARL2BP	0.440059	5.62014	3.80161	0.00056003	0.00739249	-0.659033
324	APC	0.569228	5.7625	3.80134	0.000560449	0.00739249	-0.659747
51114	ZDHHC9	0.436281	5.53643	3.79832	0.000565278	0.00744716	-0.667931
64093	SMOC1	1.05879	3.13749	3.79774	0.000566206	0.00745036	-0.669496
8237	USP11	0.298907	7.36923	3.79621	0.000568675	0.00747382	-0.673648
24147	FJX1	0.817403	4.54946	3.79478	0.000570994	0.00748862	-0.677529
7004	TEAD4	-0.789305	3.48378	-3.79424	0.00057186	0.00748862	-0.678975
84263	HSDL2	-0.399669	5.57871	-3.79398	0.000572285	0.00748862	-0.679682
10884	MRPS30	-0.405569	5.81861	-3.79381	0.000572554	0.00748862	-0.680131
80305	TRABD	-0.398246	5.97438	-3.79021	0.000578432	0.00754713	-0.689873
81887	LAS1L	-0.311152	5.68148	-3.78963	0.000579392	0.00754713	-0.691455
140809	SRXN1	-0.38694	5.44668	-3.78952	0.000579565	0.00754713	-0.69174
79968	WDR76	-0.384597	5.43153	-3.78879	0.000580775	0.00754713	-0.693728
85453	TSPYL5	-2.02195	1.62897	-3.78867	0.000580967	0.00754713	-0.694043
54879	ST7L	0.412424	3.98283	3.78854	0.000581189	0.00754713	-0.694407
729970	LOC729970	-0.879831	2.8885	-3.77874	0.00059755	0.00774463	-0.720881
1993	ELAVL2	0.31875	6.89008	3.77858	0.000597821	0.00774463	-0.721313
55744	COA1	-0.451907	6.28351	-3.77601	0.000602199	0.00778774	-0.72827
56155	TEX14	-0.892304	4.06994	-3.77578	0.00060258	0.00778774	-0.728873
140700	SAMD10	-0.782248	3.51673	-3.77433	0.000605056	0.00780432	-0.732782
26999	CYFIP2	0.474307	5.66441	3.77419	0.000605297	0.00780432	-0.733162
63916	ELMO2	0.388276	4.59294	3.77352	0.000606447	0.00780989	-0.734971
6840	SVIL	0.74045	3.88155	3.77278	0.000607723	0.00781707	-0.736975
26054	SENP6	0.397329	5.91804	3.77215	0.000608808	0.0078182	-0.738675
3338	DNAJC4	0.566394	3.79758	3.77166	0.000609648	0.0078182	-0.73999
4641	MYO1C	-0.565456	4.3552	-3.77148	0.000609966	0.0078182	-0.740486
152006	RNF38	0.611025	4.31544	3.77074	0.00061125	0.00782481	-0.742491
427	ASAH1	0.404119	5.83391	3.77012	0.000612316	0.00782481	-0.744152
375444	C5orf34	-0.844216	2.87159	-3.76994	0.000612639	0.00782481	-0.744656
150776	LOC150776	-0.455333	6.01726	-3.76939	0.000613588	0.00782775	-0.746131
10476	ATP5H	0.355812	8.12757	3.76853	0.000615089	0.00783771	-0.74846
402665	IGLON5	2.19231	0.793464	3.76722	0.000617366	0.00785751	-0.751981
57645	POGK	0.251591	6.83864	3.76598	0.000619546	0.00787605	-0.755341
340542	BEX5	2.03484	0.953546	3.7652	0.000620908	0.00788416	-0.757435
348093	RBPMS2	-1.10683	3.1861	-3.76401	0.000622998	0.00790148	-0.760638
9783	RIMS3	-0.719094	5.89392	-3.7636	0.000623726	0.0079015	-0.761751
10042	HMGXB4	-0.352134	6.8302	-3.76205	0.000626466	0.00792394	-0.765928
256364	EML3	-0.67278	4.09177	-3.76178	0.000626954	0.00792394	-0.76667
63973	NEUROG2	1.47669	3.35786	3.75844	0.000632896	0.00798976	-0.77566
5106	PCK2	-1.7498	5.41848	-3.75431	0.000640339	0.00807425	-0.786802
79616	CCNJL	0.663664	3.88597	3.7539	0.000641073	0.00807425	-0.787893
27102	EIF2AK1	-0.238015	7.40116	-3.7506	0.000647092	0.00814064	-0.796797
91584	PLXNA4	1.07231	2.55634	3.74898	0.000650052	0.00816844	-0.801146
9659	PDE4DIP	1.42546	2.01329	3.74478	0.000657811	0.0082564	-0.812449
406886	MIRLET7D	-1.58303	2.69155	-3.74353	0.000660149	0.00827621	-0.81583
4702	NDUFA8	0.230154	7.23311	3.74168	0.000663593	0.00829888	-0.820787
23270	TSPYL4	0.484106	5.9765	3.74145	0.000664037	0.00829888	-0.821423
127687	C1orf122	0.56073	5.69099	3.74134	0.000664246	0.00829888	-0.821723
9801	MRPL19	-0.35683	6.0401	-3.73974	0.000667245	0.00832678	-0.826013
10298	PAK4	0.980528	4.21198	3.73838	0.000669821	0.0083465	-0.829684
4915	NTRK2	2.36443	0.956773	3.73809	0.000670358	0.0083465	-0.830448
4300	MLLT3	0.519414	4.81261	3.73752	0.000671451	0.00834992	-0.831999
26520	TIMM9	-0.387391	5.86531	-3.73714	0.000672168	0.00834992	-0.833015
1936	EEF1D	-0.353844	7.45649	-3.73597	0.00067439	0.00836627	-0.83616
51805	COQ3	-0.593684	3.88752	-3.73564	0.000675022	0.00836627	-0.837051
1460	CSNK2B	-0.63141	3.4892	-3.73444	0.000677301	0.00837828	-0.840262
993	CDC25A	-0.444	6.83838	-3.73432	0.00067753	0.00837828	-0.840584
34	ACADM	0.350315	6.21502	3.73312	0.000679832	0.0083972	-0.843814
147912	SIX5	-0.70576	5.10082	-3.73039	0.00068509	0.00845255	-0.851151
8031	NCOA4	0.286588	6.20937	3.72894	0.00068789	0.00847749	-0.855036
9824	ARHGAP11A	-0.337856	5.10501	-3.72423	0.000697104	0.00858132	-0.867705
90861	HN1L	-0.284874	7.04692	-3.72282	0.000699875	0.0086052	-0.871482
9444	QKI	-0.255824	7.55437	-3.72244	0.000700626	0.0086052	-0.872503
26122	EPC2	0.474171	5.64963	3.71538	0.000714722	0.00876843	-0.891467
1603	DAD1	0.440513	6.61701	3.71491	0.000715666	0.00877013	-0.892724
388403	YPEL2	0.633182	4.00581	3.71215	0.000721247	0.00880113	-0.900117
4899	NRF1	-0.498404	3.84924	-3.712	0.000721541	0.00880113	-0.900506
6653	SORL1	0.804782	3.4942	3.71174	0.00072208	0.00880113	-0.901217
5420	PODXL	0.804118	3.43583	3.71171	0.000722146	0.00880113	-0.901304
57509	MTUS1	1.03797	3.92362	3.71166	0.000722239	0.00880113	-0.901426
51368	TEX264	0.861382	3.17607	3.70822	0.000729265	0.00887681	-0.910641
5770	PTPN1	0.307307	8.0375	3.70606	0.000733734	0.00891205	-0.916455
4528	MTIF2	-0.412046	6.24155	-3.70602	0.000733799	0.00891205	-0.916539
7837	PXDN	0.518869	5.87493	3.70272	0.000740663	0.00898539	-0.9254
5831	PYCR1	-0.675317	7.43872	-3.70076	0.000744754	0.00902495	-0.930641
2178	FANCE	-0.635186	4.40862	-3.69905	0.00074834	0.00905833	-0.935213
9592	IER2	-0.589049	6.66733	-3.69635	0.000754044	0.00911631	-0.942438
27163	NAAA	-0.5692	3.59524	-3.696	0.000754805	0.00911631	-0.943398
8905	AP1S2	-0.338172	6.36098	-3.69402	0.00075901	0.00915693	-0.948683
64359	NXN	-0.366382	6.37682	-3.68956	0.000768595	0.00925155	-0.960621
1740	DLG2	1.78361	1.75693	3.68944	0.00076884	0.00925155	-0.960925
10949	HNRNPA0	0.28353	8.84236	3.68918	0.000769404	0.00925155	-0.961622
64283	ARHGEF28	1.0518	2.89043	3.68707	0.000773981	0.00929632	-0.967265
6502	SKP2	-0.305105	7.89592	-3.68199	0.000785112	0.00941962	-0.980846
10867	TSPAN9	0.476343	5.46406	3.68085	0.000787639	0.00943953	-0.983903
389906	LOC389906	-0.54611	4.06975	-3.67917	0.000791355	0.00947362	-0.988379
115098	CCDC124	0.414039	5.2223	3.67835	0.000793199	0.00948526	-0.990592
23598	PATZ1	0.32166	6.65267	3.67557	0.000799402	0.00954895	-0.998
5599	MAPK8	0.37476	5.08423	3.67481	0.000801112	0.00955888	-1.00003
6602	SMARCD1	0.33716	6.08044	3.67433	0.000802206	0.00956146	-1.00133
26260	FBXO25	0.505743	4.91768	3.67293	0.000805366	0.0095824	-1.00507
54407	SLC38A2	-0.561752	7.95902	-3.67277	0.000805725	0.0095824	-1.00549
7398	USP1	-0.256748	7.9341	-3.67194	0.0008076	0.00959422	-1.0077
2954	GSTZ1	0.528363	4.26475	3.67112	0.000809461	0.00960584	-1.00989
25832	NBPF14	0.51354	5.04343	3.67051	0.000810845	0.00961178	-1.01152
11218	DDX20	0.409202	5.29224	3.66616	0.000820801	0.00971251	-1.02312
9585	KIF20B	-0.409139	7.863	-3.66586	0.000821502	0.00971251	-1.02393
2548	GAA	0.533007	5.06775	3.66563	0.00082202	0.00971251	-1.02453
10956	OS9	0.394339	6.4464	3.6642	0.000825328	0.00974102	-1.02835
3267	AGFG1	0.315222	6.48201	3.66351	0.000826936	0.00974491	-1.0302
6205	RPS11	0.50124	11.2651	3.66329	0.000827449	0.00974491	-1.03079
23649	POLA2	-0.445403	5.25221	-3.66289	0.000828376	0.00974528	-1.03185
25816	TNFAIP8	-0.79076	3.50353	-3.66231	0.000829711	0.00975045	-1.03338
9361	LONP1	-0.453875	6.44573	-3.66177	0.000830979	0.00975482	-1.03483
7168	TPM1	0.618759	7.12882	3.6609	0.000833012	0.00976814	-1.03716
5331	PLCB3	-0.556779	4.94979	-3.66008	0.000834924	0.00978003	-1.03934
6786	STIM1	-0.549743	4.27219	-3.65848	0.000838684	0.00980138	-1.04361
114932	MRFAP1L1	0.328811	8.60782	3.65801	0.000839794	0.00980138	-1.04486
23239	PHLPP1	-0.850183	2.64727	-3.65798	0.000839847	0.00980138	-1.04492
6949	TCOF1	-0.289027	7.78047	-3.65777	0.00084035	0.00980138	-1.04549
27065	NSG1	0.833793	4.95121	3.65488	0.00084719	0.00987058	-1.0532
23178	PASK	-0.543911	3.74333	-3.65391	0.000849491	0.00988379	-1.05578
151556	GPR155	0.474003	4.53651	3.65364	0.000850141	0.00988379	-1.0565
84816	RTN4IP1	-0.39944	3.70335	-3.65139	0.000855522	0.00993575	-1.0625
113130	CDCA5	-0.328103	5.72833	-3.64765	0.000864517	0.0100256	-1.07244
10494	STK25	-0.29889	6.95824	-3.64741	0.000865098	0.0100256	-1.07308
7799	PRDM2	0.493642	5.04349	3.64664	0.00086697	0.0100366	-1.07513
100506686	IQCH-AS1	0.708234	3.23856	3.64208	0.000878117	0.0101548	-1.08727
64403	CDH24	0.93302	3.42027	3.64126	0.000880121	0.0101672	-1.08943
3831	KLC1	0.270914	7.0205	3.63689	0.00089097	0.0102816	-1.10107
100507316	MINCR	-0.958563	2.77151	-3.63615	0.000892804	0.0102918	-1.10303
10728	PTGES3	-0.212672	9.25014	-3.63561	0.000894158	0.0102965	-1.10447
64374	SIL1	0.762664	4.10958	3.63501	0.000895663	0.010303	-1.10606
3433	IFIT2	-1.45989	0.588583	-3.63416	0.000897798	0.0103166	-1.10833
10007	GNPDA1	-0.25549	7.88978	-3.63196	0.000903346	0.0103526	-1.11418
8499	PPFIA2	0.993933	2.27881	3.63188	0.000903544	0.0103526	-1.11439
51310	SLC22A17	0.410461	5.07436	3.63178	0.000903784	0.0103526	-1.11464
117583	PARD3B	0.6616	3.43432	3.63136	0.000904847	0.0103526	-1.11575
1316	KLF6	-0.373724	6.01989	-3.63076	0.000906372	0.0103526	-1.11735
54602	NDFIP2	0.572752	4.79653	3.63066	0.000906637	0.0103526	-1.11763
27249	MMADHC	0.310248	6.57643	3.62988	0.000908614	0.0103643	-1.1197
23396	PIP5K1C	0.521414	4.6695	3.62686	0.000916319	0.0104412	-1.12772
439949	PRKCQ-AS1	2.13134	1.27986	3.6263	0.000917735	0.0104464	-1.12919
6722	SRF	-0.502242	7.04038	-3.62522	0.00092051	0.0104671	-1.13205
9517	SPTLC2	-0.34032	5.9281	-3.62407	0.000923485	0.0104899	-1.13512
91603	ZNF830	0.418646	4.71943	3.6212	0.000930918	0.0105633	-1.14273
55074	OXR1	0.49425	5.30524	3.61881	0.000937158	0.0106118	-1.14907
54929	TMEM161A	-0.366273	5.16302	-3.61866	0.000937539	0.0106118	-1.14946
3628	INPP1	-0.546949	4.46917	-3.61844	0.000938117	0.0106118	-1.15004
580	BARD1	-0.36606	6.02854	-3.61505	0.00094706	0.0106913	-1.15905
9895	TECPR2	0.482619	4.35303	3.61503	0.00094711	0.0106913	-1.1591
83540	NUF2	-0.320451	8.18201	-3.61425	0.00094918	0.0107036	-1.16117
25831	HECTD1	0.373493	6.66345	3.6113	0.000957021	0.0107761	-1.16898
55208	DCUN1D2	-0.461746	3.37257	-3.61109	0.000957589	0.0107761	-1.16955
6901	TAZ	-0.558489	3.63763	-3.60607	0.000971105	0.0109169	-1.18285
114785	MBD6	-0.608549	5.05633	-3.60377	0.000977351	0.0109718	-1.18894
122786	FRMD6	0.737235	3.38129	3.60353	0.000978006	0.0109718	-1.18957
995	CDC25C	-0.553967	4.90003	-3.60262	0.000980476	0.0109788	-1.19197
10541	ANP32B	-0.30924	9.53946	-3.60256	0.000980648	0.0109788	-1.19213
770	CA11	-0.580717	4.53234	-3.60184	0.000982631	0.0109897	-1.19405
8079	MLF2	-0.301318	7.57546	-3.60088	0.000985258	0.0110078	-1.19658
9771	RAPGEF5	0.611258	5.12806	3.59966	0.000988624	0.0110341	-1.19982
28951	TRIB2	0.386359	7.05464	3.59821	0.00099261	0.0110672	-1.20364
219771	CCNY	0.362745	6.2067	3.59725	0.000995263	0.0110854	-1.20617
54974	THG1L	-0.552368	4.79796	-3.59412	0.001004	0.0111713	-1.21446
55742	PARVA	0.971958	3.20855	3.59339	0.00100606	0.0111827	-1.21641
7750	ZMYM2	0.277404	6.33414	3.59233	0.00100903	0.0112043	-1.21921
55157	DARS2	-0.396933	5.29858	-3.58915	0.001018	0.0112925	-1.22761
10425	ARIH2	-0.282271	6.87456	-3.5886	0.00101957	0.0112983	-1.22907
126282	TNFAIP8L1	-0.549157	3.95299	-3.58723	0.00102346	0.0113299	-1.23267
51315	KRCC1	0.494054	5.44785	3.58534	0.00102886	0.0113781	-1.23767
444	ASPH	-0.415549	5.43395	-3.58435	0.00103171	0.0113981	-1.2403
91746	YTHDC1	0.424674	4.93261	3.58228	0.00103767	0.0114522	-1.24575
4234	METTL1	-0.508274	4.73927	-3.5815	0.00103992	0.0114654	-1.24781
58476	TP53INP2	1.02554	4.24511	3.58024	0.00104356	0.011494	-1.25113
63892	THADA	-0.380492	5.42563	-3.57985	0.00104471	0.0114949	-1.25217
27079	RPUSD2	-0.424249	5.70601	-3.57918	0.00104664	0.0115046	-1.25392
125988	C19orf70	0.428073	4.34539	3.57716	0.00105256	0.011558	-1.25927
10765	KDM5B	0.425641	8.04798	3.57463	0.00106	0.011628	-1.26595
5360	PLTP	-0.706851	2.93199	-3.57367	0.00106283	0.0116473	-1.26848
51274	KLF3	-0.592635	5.17691	-3.57159	0.00106899	0.011703	-1.27396
83729	INHBE	-2.42914	4.54817	-3.5706	0.00107192	0.011722	-1.27656
9669	EIF5B	-0.211241	10.1589	-3.57028	0.00107288	0.011722	-1.27741
23062	GGA2	-0.344538	6.25774	-3.56978	0.00107439	0.0117267	-1.27874
51665	ASB1	-0.399945	5.00942	-3.56931	0.0010758	0.0117303	-1.27998
29994	BAZ2B	0.387093	7.24751	3.5689	0.00107702	0.0117319	-1.28105
10606	PAICS	-0.405112	8.18687	-3.56646	0.00108435	0.0117999	-1.28748
10955	SERINC3	0.372651	4.94314	3.56512	0.00108839	0.0118254	-1.29101
389741	GLIDR	0.435485	5.11678	3.56496	0.00108887	0.0118254	-1.29143
79990	PLEKHH3	-0.644744	4.95824	-3.56191	0.00109813	0.0119141	-1.29946
6176	RPLP1	0.300223	11.76	3.55912	0.00110668	0.0119949	-1.30681
8672	EIF4G3	0.423645	6.52203	3.55844	0.00110878	0.0120057	-1.3086
11230	PRAF2	0.381129	5.80442	3.55686	0.00111365	0.0120464	-1.31275
3236	HOXD10	0.555818	4.54829	3.5528	0.00112629	0.0121525	-1.32345
148304	C1orf74	-0.736216	3.52071	-3.55262	0.00112685	0.0121525	-1.32393
374875	HSD11B1L	0.628521	3.41019	3.55249	0.00112724	0.0121525	-1.32425
10382	TUBB4A	-0.828732	2.91862	-3.55228	0.00112792	0.0121525	-1.32482
55319	TMA16	-0.282268	7.68788	-3.55132	0.00113093	0.0121729	-1.32735
5332	PLCB4	0.578704	4.60734	3.55069	0.00113289	0.0121819	-1.32899
83955	NACAP1	0.712524	5.15657	3.54825	0.0011406	0.0122476	-1.33542
10469	TIMM44	-0.594223	5.74401	-3.54804	0.00114125	0.0122476	-1.33596
3032	HADHB	-0.274867	6.5016	-3.54678	0.00114525	0.0122784	-1.33927
55745	AP5M1	0.366207	5.16428	3.54628	0.00114686	0.0122836	-1.3406
23077	MYCBP2	0.509071	6.57427	3.54585	0.00114821	0.0122859	-1.34172
51239	ANKRD39	-0.65946	4.12945	-3.54251	0.00115891	0.0123882	-1.3505
1153	CIRBP	0.270042	8.3555	3.5412	0.00116313	0.0124212	-1.35395
151887	CCDC80	-0.7945	5.18468	-3.53999	0.00116704	0.0124445	-1.35713
3782	KCNN3	1.28318	2.42706	3.53981	0.0011676	0.0124445	-1.35758
81609	SNX27	0.268401	7.08864	3.53847	0.00117196	0.0124788	-1.36112
1050	CEBPA	1.01928	2.32858	3.53725	0.00117593	0.0124982	-1.36432
81620	CDT1	-0.654593	5.33416	-3.5372	0.00117608	0.0124982	-1.36444
54587	MXRA8	-0.682164	5.097	-3.53602	0.00117994	0.0125263	-1.36754
10529	NEBL	-0.743933	2.92469	-3.53569	0.00118103	0.0125263	-1.36842
29886	SNX8	-0.509121	4.51975	-3.53414	0.0011861	0.0125643	-1.37248
966	CD59	0.507997	5.39222	3.53389	0.00118693	0.0125643	-1.37313
5573	PRKAR1A	0.222528	8.39967	3.52709	0.00120949	0.0127908	-1.39097
9910	RABGAP1L	0.63502	4.02934	3.52629	0.00121217	0.0128066	-1.39306
50515	CHST11	0.539025	4.6802	3.52524	0.00121572	0.0128316	-1.39583
57186	RALGAPA2	0.581185	4.07686	3.52477	0.00121729	0.0128333	-1.39706
6152	RPL24	0.312671	10.2339	3.52449	0.00121823	0.0128333	-1.39779
57492	ARID1B	0.310234	6.85873	3.52229	0.00122567	0.0128991	-1.40355
6666	SOX12	0.263431	7.83611	3.52151	0.0012283	0.0129144	-1.40558
80023	NRSN2	0.709307	2.94926	3.5191	0.00123653	0.0129883	-1.4119
79672	FN3KRP	-0.427544	4.78088	-3.51473	0.00125156	0.0131287	-1.42334
6731	SRP72	-0.194615	8.4893	-3.51452	0.00125231	0.0131287	-1.42391
79230	ZNF557	-0.517167	4.74449	-3.51305	0.00125739	0.0131693	-1.42774
55312	RFK	-0.373438	6.83763	-3.50889	0.00127194	0.0132964	-1.43863
148413	LOC148413	-0.666575	3.48669	-3.50888	0.00127197	0.0132964	-1.43865
100462983	MTRNR2L3	0.653339	4.13716	3.50834	0.00127389	0.0133037	-1.44008
7412	VCAM1	-2.47825	0.731219	-3.50553	0.00128382	0.0133946	-1.44743
10112	KIF20A	-0.416752	6.42008	-3.50297	0.0012929	0.0134764	-1.4541
554313	HIST2H4B	0.766903	3.63926	3.50222	0.00129559	0.0134915	-1.45606
11124	FAF1	-0.358357	7.09619	-3.49832	0.00130962	0.0136246	-1.46626
63901	FAM111A	-2.21087	0.691346	-3.49635	0.00131676	0.0136858	-1.4714
89832	CHRFAM7A	0.921978	2.15999	3.49226	0.00133172	0.013828	-1.48209
83857	TMTC1	0.864076	2.28136	3.49076	0.00133722	0.0138719	-1.48599
57498	KIDINS220	0.359681	6.97096	3.48949	0.00134192	0.0139008	-1.48931
1183	CLCN4	0.535946	4.40894	3.48932	0.00134256	0.0139008	-1.48976
3598	IL13RA2	-1.77633	2.13076	-3.48888	0.0013442	0.0139046	-1.49091
10163	WASF2	-0.359212	7.51167	-3.48841	0.00134593	0.0139092	-1.49212
80167	ABHD18	-0.711313	2.91265	-3.48668	0.00135236	0.0139624	-1.49663
55251	PCMTD2	0.475574	5.44082	3.48624	0.00135399	0.013966	-1.49778
55049	C19orf60	0.412009	5.91989	3.4818	0.00137068	0.0141247	-1.50936
22809	ATF5	-1.23356	2.71797	-3.47915	0.00138072	0.0142148	-1.51626
2324	FLT4	-0.711371	3.46153	-3.47793	0.00138538	0.0142493	-1.51945
79894	ZNF672	0.436753	4.41601	3.47753	0.00138691	0.0142515	-1.52049
9324	HMGN3	0.301601	7.15158	3.47662	0.00139037	0.0142736	-1.52285
10078	TSSC4	0.388856	4.93547	3.47455	0.00139833	0.0143418	-1.52825
84057	MND1	-0.416963	4.8644	-3.47062	0.00141353	0.0144841	-1.53847
831	CAST	0.431805	6.07851	3.46991	0.00141629	0.0144987	-1.54031
840	CASP7	-0.464505	4.07337	-3.46814	0.00142325	0.0145562	-1.54494
4173	MCM4	-0.329747	7.21522	-3.46355	0.0014413	0.0147191	-1.55685
3137	HLA-J	-1.67049	1.28063	-3.46341	0.00144188	0.0147191	-1.55723
1108	CHD4	0.289557	8.95306	3.46245	0.00144568	0.014744	-1.55972
869	CBLN1	0.699347	3.81595	3.46158	0.00144915	0.0147656	-1.56199
54778	RNF111	0.395329	4.83185	3.45939	0.00145792	0.0148377	-1.56769
10299	MARCH6	0.230416	7.53462	3.45913	0.00145895	0.0148377	-1.56836
606495	CYB5RL	-0.826644	2.66449	-3.45857	0.00146119	0.0148466	-1.56981
23225	NUP210	-0.411437	5.74194	-3.45788	0.00146397	0.0148609	-1.5716
57534	MIB1	0.415577	5.92016	3.45747	0.0014656	0.0148637	-1.57266
54876	DCAF16	-0.436054	5.03321	-3.45482	0.00147632	0.0149583	-1.57954
219333	USP12	0.347494	4.92693	3.45319	0.00148294	0.0150115	-1.58377
84938	ATG4C	-0.392664	4.70529	-3.45278	0.00148463	0.0150146	-1.58484
55596	ZCCHC8	-0.629221	4.91828	-3.452	0.00148782	0.015033	-1.58687
5441	POLR2L	0.349214	7.57689	3.45156	0.00148963	0.0150372	-1.58802
1891	ECH1	-0.298906	7.07422	-3.45105	0.00149169	0.0150441	-1.58933
25999	CLIP3	0.480991	5.33782	3.45015	0.00149539	0.0150674	-1.59166
51512	GTSE1	-0.348563	6.60482	-3.44975	0.00149705	0.0150703	-1.59272
4947	OAZ2	0.314364	7.43153	3.44772	0.00150541	0.0151404	-1.59798
5575	PRKAR1B	0.484375	4.4591	3.44327	0.00152393	0.0153017	-1.60952
1033	CDKN3	-0.455131	5.39969	-3.44319	0.00152426	0.0153017	-1.60973
4682	NUBP1	1.28063	3.1288	3.44218	0.00152847	0.0153298	-1.61233
143282	FGFBP3	-0.604496	3.79689	-3.43954	0.00153961	0.0154273	-1.61919
55771	PRR11	-0.368326	7.57815	-3.43426	0.00156204	0.0156376	-1.63285
4841	NONO	0.363155	8.80263	3.43314	0.00156686	0.0156715	-1.63576
79776	ZFHX4	0.410747	5.76639	3.43261	0.00156912	0.0156797	-1.63712
4254	KITLG	1.41968	2.62753	3.43165	0.00157327	0.0157067	-1.63961
23478	SEC11A	-0.247581	8.35565	-3.43038	0.00157876	0.0157471	-1.64291
6833	ABCC8	1.42371	2.2154	3.42727	0.00159228	0.0158674	-1.65095
1938	EEF2	-0.318149	11.0986	-3.42542	0.00160034	0.0159331	-1.65572
6428	SRSF3	0.321151	9.08088	3.4244	0.00160485	0.015956	-1.65837
4594	MUT	0.338883	5.14685	3.42423	0.00160557	0.015956	-1.6588
134218	DNAJC21	-0.279329	6.98043	-3.42349	0.00160882	0.0159737	-1.66071
4134	MAP4	-0.285387	6.37134	-3.42273	0.00161218	0.0159925	-1.66268
27292	DIMT1	-0.277565	6.72629	-3.42161	0.00161717	0.0160273	-1.66559
22820	COPG1	0.393848	5.64312	3.41843	0.00163129	0.0161526	-1.6738
51406	NOL7	-0.301116	6.62037	-3.41737	0.00163604	0.0161849	-1.67654
253430	IPMK	-0.474124	3.44022	-3.41422	0.00165021	0.0163102	-1.68468
1903	S1PR3	-1.41612	2.44782	-3.4125	0.00165799	0.0163723	-1.68912
6855	SYP	0.628412	4.9122	3.41085	0.00166547	0.0164312	-1.69336
10056	FARSB	-0.332347	7.26795	-3.40992	0.00166971	0.0164582	-1.69577
6835	SURF2	-0.313384	5.28723	-3.4089	0.0016744	0.0164894	-1.69841
64167	ERAP2	-2.39798	0.749438	-3.40768	0.00167998	0.0165295	-1.70155
5763	PTMS	0.45738	8.52695	3.40729	0.00168178	0.0165321	-1.70256
27436	EML4	-0.335347	7.72938	-3.40215	0.00170554	0.0167415	-1.71579
389	RHOC	0.328422	5.51015	3.40189	0.00170679	0.0167415	-1.71649
1434	CSE1L	-0.25273	7.80571	-3.40169	0.00170769	0.0167415	-1.71698
399947	C11orf87	1.85253	1.08731	3.40128	0.00170962	0.016742	-1.71805
54512	EXOSC4	-0.719459	3.35028	-3.40102	0.00171081	0.016742	-1.71871
285704	RGMB	-0.517545	4.96366	-3.40063	0.00171266	0.0167449	-1.71972
84928	TMEM209	-0.63619	3.12529	-3.39766	0.00172663	0.0168664	-1.72738
84930	MASTL	-0.415463	4.72278	-3.39715	0.00172903	0.0168747	-1.7287
151742	PPM1L	0.587897	4.25397	3.3952	0.00173825	0.0169418	-1.73371
9266	CYTH2	0.38263	5.52402	3.39504	0.00173902	0.0169418	-1.73413
6319	SCD	-0.372206	9.63144	-3.3903	0.00176165	0.0171469	-1.74632
220108	FAM124A	0.860347	3.02033	3.3895	0.00176548	0.0171637	-1.74837
55031	USP47	0.294613	6.49288	3.38912	0.00176732	0.0171637	-1.74935
8997	KALRN	0.57687	4.17431	3.38896	0.0017681	0.0171637	-1.74977
57234	LINC00869	0.867047	2.35558	3.38813	0.00177211	0.0171872	-1.7519
379	ARL4D	-1.1628	6.04409	-3.38709	0.00177715	0.0172208	-1.75458
79763	ISOC2	0.683841	4.09199	3.38602	0.00178234	0.0172557	-1.75732
347252	IGFBPL1	0.291936	9.31683	3.38456	0.00178948	0.0173094	-1.76109
56853	CELF4	1.14041	2.79372	3.38304	0.00179689	0.0173656	-1.76499
283624	LINC00641	0.610201	4.19057	3.38025	0.00181058	0.0174825	-1.77215
55603	FAM46A	-0.635209	4.98875	-3.37844	0.00181958	0.0175538	-1.77682
10360	NPM3	-0.355073	7.30933	-3.37543	0.00183456	0.0176691	-1.78454
9500	MAGED1	0.394741	7.00633	3.37538	0.00183478	0.0176691	-1.78466
25978	CHMP2B	0.28372	6.06455	3.37291	0.0018472	0.0177729	-1.79101
51690	LSM7	0.339887	7.07362	3.37232	0.00185018	0.0177859	-1.79253
338657	CCDC84	-0.581239	3.56465	-3.37141	0.00185477	0.0177955	-1.79487
1337	COX6A1	0.266075	8.80518	3.3713	0.00185529	0.0177955	-1.79513
57630	SH3RF1	0.618095	4.6558	3.37115	0.00185608	0.0177955	-1.79554
5255	PHKA1	1.43992	0.607439	3.36858	0.00186909	0.0179045	-1.80212
9202	ZMYM4	0.311427	6.18091	3.36814	0.00187134	0.0179103	-1.80325
10106	CTDSP2	-0.389717	6.84128	-3.3669	0.00187765	0.0179548	-1.80642
56172	ANKH	0.709705	3.69785	3.36416	0.00189171	0.0180734	-1.81345
16	AARS	-0.750463	7.2677	-3.3624	0.00190077	0.018144	-1.81795
51524	TMEM138	-0.555126	4.6455	-3.35956	0.00191553	0.0182676	-1.82523
6648	SOD2	-0.390199	5.70852	-3.35922	0.00191729	0.0182676	-1.8261
10687	PNMA2	0.658449	4.87832	3.35894	0.00191875	0.0182676	-1.82682
80342	TRAF3IP3	-0.631889	3.18282	-3.35821	0.00192256	0.0182878	-1.82868
56928	SPPL2B	0.623179	4.31689	3.35689	0.00192947	0.0183376	-1.83207
55626	AMBRA1	0.503223	3.48123	3.35495	0.00193971	0.0184188	-1.83705
79711	IPO4	-0.823538	3.27144	-3.34845	0.00197427	0.0187282	-1.85368
2004	ELK3	-0.366097	4.97728	-3.34817	0.00197573	0.0187282	-1.85438
1869	E2F1	-0.327424	6.46496	-3.34545	0.0019904	0.01884	-1.86134
114088	TRIM9	-0.437132	4.87505	-3.34503	0.00199269	0.01884	-1.86242
4673	NAP1L1	-0.183286	10.6921	-3.34502	0.00199273	0.01884	-1.86244
55342	STRBP	0.298302	6.64733	3.34452	0.00199544	0.0188493	-1.86372
3620	IDO1	-1.73007	0.865103	-3.34379	0.00199936	0.01887	-1.86557
2274	FHL2	-0.359309	5.53957	-3.34315	0.00200284	0.0188864	-1.86721
200894	ARL13B	-0.3824	5.45176	-3.33885	0.00202639	0.0190721	-1.87821
7468	WHSC1	-0.255357	7.77926	-3.3388	0.00202662	0.0190721	-1.87832
7464	CORO2A	0.588839	4.5703	3.33859	0.00202779	0.0190721	-1.87886
23204	ARL6IP1	0.349162	8.03282	3.3368	0.00203765	0.0191483	-1.88342
57616	TSHZ3	0.596013	4.42044	3.33501	0.0020476	0.0192243	-1.88801
10957	PNRC1	0.541627	5.71581	3.33458	0.00204998	0.0192243	-1.8891
54058	C21orf58	-0.655826	3.73925	-3.33413	0.00205249	0.0192243	-1.89025
1209	CLPTM1	0.521642	5.36546	3.33407	0.0020528	0.0192243	-1.8904
10175	CNIH1	-0.357495	6.23313	-3.33344	0.00205633	0.0192408	-1.89201
54432	YIPF1	0.383318	4.73031	3.3322	0.00206324	0.01927	-1.89517
60481	ELOVL5	-0.300089	6.78406	-3.33209	0.00206387	0.01927	-1.89545
23354	HAUS5	-0.426203	4.39567	-3.33178	0.00206563	0.01927	-1.89626
57446	NDRG3	-0.350959	5.78465	-3.33136	0.00206797	0.01927	-1.89732
90271	OLMALINC	-0.690964	3.86518	-3.3313	0.00206831	0.01927	-1.89748
84986	ARHGAP19	-0.359456	4.30192	-3.33091	0.00207046	0.0192735	-1.89845
6790	AURKA	-0.415164	7.26615	-3.33019	0.0020745	0.0192946	-1.90029
55602	CDKN2AIP	0.468366	4.62842	3.32873	0.00208274	0.0193548	-1.90402
150737	TTC30B	-0.565687	3.85477	-3.32834	0.00208495	0.0193587	-1.90502
10807	SDCCAG3	-0.425342	5.54491	-3.32755	0.00208944	0.0193674	-1.90704
143884	CWF19L2	-0.336521	6.18171	-3.32754	0.00208945	0.0193674	-1.90704
8189	SYMPK	0.33568	6.70015	3.32703	0.00209238	0.0193781	-1.90836
990	CDC6	-0.385563	5.97988	-3.32339	0.00211308	0.0195399	-1.91763
140885	SIRPA	1.72718	0.624696	3.32333	0.00211344	0.0195399	-1.91779
4258	MGST2	-2.29172	1.57222	-3.32198	0.0021212	0.019595	-1.92123
317662	FAM149B1	-0.554991	4.04774	-3.32023	0.00213123	0.0196709	-1.92567
5889	RAD51C	-0.261197	6.02311	-3.31946	0.0021357	0.019676	-1.92764
374291	NDUFS7	0.349017	6.58648	3.31928	0.00213672	0.019676	-1.92809
284	ANGPT1	-1.64971	1.92346	-3.3192	0.0021372	0.019676	-1.9283
283820	NOMO2	0.450797	6.32068	3.31815	0.00214331	0.0197155	-1.93098
6301	SARS	-0.689269	8.07578	-3.31773	0.00214573	0.0197212	-1.93205
63922	CHTF18	-0.602194	4.12778	-3.31713	0.00214922	0.0197366	-1.93358
5528	PPP2R5D	-0.467417	4.60325	-3.31646	0.00215312	0.0197557	-1.93528
85360	SYDE1	-0.751355	3.52137	-3.31505	0.00216133	0.0198143	-1.93886
101928626	LOC101928626	0.745287	8.53734	3.31442	0.00216502	0.0198315	-1.94046
84080	ENKD1	-0.486815	4.41198	-3.31076	0.00218656	0.0200011	-1.94977
29959	NRBP1	0.290365	6.43473	3.31065	0.00218722	0.0200011	-1.95006
51099	ABHD5	-0.433202	3.86329	-3.30829	0.00220118	0.0201119	-1.95604
23150	FRMD4B	0.625517	4.67462	3.30712	0.00220821	0.0201366	-1.95903
91614	DEPDC7	0.683823	2.8476	3.30696	0.00220916	0.0201366	-1.95944
9821	RB1CC1	0.369216	7.63554	3.30691	0.00220944	0.0201366	-1.95956
204	AK2	-0.219507	8.43257	-3.30637	0.00221267	0.0201492	-1.96093
5721	PSME2	-0.401674	5.28772	-3.30417	0.00222586	0.0202523	-1.96652
26092	TOR1AIP1	0.403384	5.05319	3.30196	0.00223916	0.0203564	-1.97212
51075	TMX2	0.328795	7.22437	3.30133	0.00224301	0.0203743	-1.97374
9604	RNF14	-0.38824	5.58376	-3.3005	0.00224801	0.0204027	-1.97583
11332	ACOT7	-0.336012	6.07902	-3.29932	0.0022552	0.0204509	-1.97883
375449	MAST4	0.629288	3.94773	3.29843	0.00226063	0.0204831	-1.98109
91694	LONRF1	-0.516123	5.05908	-3.29706	0.00226903	0.0205421	-1.98457
90381	TICRR	-0.577904	4.05519	-3.29504	0.0022814	0.0206233	-1.98968
9879	DDX46	-0.262806	8.52024	-3.29498	0.00228179	0.0206233	-1.98985
3308	HSPA4	-0.218049	7.75839	-3.29452	0.00228461	0.0206286	-1.99101
8870	IER3	-1.67485	1.81497	-3.29409	0.00228728	0.0206286	-1.9921
113612	CYP2U1	0.530991	3.64187	3.29373	0.00228953	0.0206286	-1.99303
26137	ZBTB20	0.755973	3.67338	3.29366	0.00228996	0.0206286	-1.9932
7263	TST	0.529408	4.73961	3.29279	0.00229529	0.0206595	-1.99539
6429	SRSF4	0.365051	6.98051	3.29138	0.00230405	0.0207212	-1.99897
55009	C19orf24	-0.454836	5.56999	-3.28997	0.00231287	0.0207733	-2.00256
4301	AFDN	0.318258	6.77796	3.28984	0.00231366	0.0207733	-2.00288
3776	KCNK2	0.660331	4.63264	3.28931	0.00231695	0.0207857	-2.00421
51205	ACP6	0.462315	4.71206	3.28837	0.00232288	0.0208011	-2.00661
139341	FUNDC1	0.295391	5.22516	3.28824	0.00232363	0.0208011	-2.00692
23625	FAM89B	0.423646	5.87778	3.28812	0.0023244	0.0208011	-2.00723
54994	GID8	-0.234274	7.4625	-3.28674	0.00233309	0.0208465	-2.01073
57658	CALCOCO1	0.846446	2.59894	3.2867	0.0023333	0.0208465	-2.01082
3955	LFNG	0.726236	3.24903	3.28256	0.00235952	0.0210609	-2.02131
64860	ARMCX5	-0.727721	3.42277	-3.28194	0.00236346	0.0210609	-2.02288
29923	HILPDA	-0.457327	6.49307	-3.28188	0.00236381	0.0210609	-2.02302
441631	TSPAN11	-0.633741	3.79913	-3.28169	0.00236504	0.0210609	-2.02351
26207	PITPNC1	-0.389728	4.48528	-3.28094	0.00236987	0.0210866	-2.02543
79042	TSEN34	-0.60381	4.20641	-3.28028	0.00237408	0.0211068	-2.02709
23295	MGRN1	0.444382	5.22161	3.27817	0.00238757	0.0212094	-2.03242
5990	RFX2	0.98626	2.39997	3.27776	0.0023902	0.0212155	-2.03345
9215	LARGE1	0.403069	3.925	3.27742	0.00239239	0.0212176	-2.03431
10228	STX6	0.298412	5.65681	3.27577	0.0024031	0.0212952	-2.03851
51439	FAM8A1	0.35799	4.64909	3.27445	0.00241166	0.0213537	-2.04184
4016	LOXL1	0.44785	5.88927	3.27108	0.00243357	0.0215302	-2.05034
10899	JTB	-0.213585	8.80581	-3.27013	0.00243983	0.021568	-2.05275
23637	RABGAP1	0.263164	6.86144	3.26889	0.00244797	0.0216224	-2.05588
101927279	EP300-AS1	-0.720204	2.78332	-3.26651	0.00246369	0.0217436	-2.06188
51256	TBC1D7	0.38674	4.76086	3.26561	0.0024697	0.0217625	-2.06417
9201	DCLK1	0.562641	4.23648	3.26559	0.00246982	0.0217625	-2.06422
342979	PALM3	-0.697385	3.19546	-3.26405	0.00248006	0.0218349	-2.0681
79048	SECISBP2	-0.272044	6.393	-3.2634	0.00248441	0.0218556	-2.06975
9741	LAPTM4A	0.203069	9.20986	3.26292	0.00248759	0.0218659	-2.07095
219988	PATL1	-0.420249	5.09454	-3.26241	0.00249102	0.0218783	-2.07224
5862	RAB2A	0.187087	7.65507	3.26116	0.00249941	0.0219343	-2.0754
30820	KCNIP1	2.09098	-0.181027	3.25936	0.00251151	0.0220228	-2.07993
157922	CAMSAP1	0.26518	5.81617	3.25876	0.00251559	0.0220408	-2.08145
10063	COX17	-0.389132	8.05393	-3.25733	0.00252525	0.0220982	-2.08505
5007	OSBP	0.350065	5.24216	3.25719	0.0025262	0.0220982	-2.0854
388662	SLC6A17	1.03278	3.22475	3.25661	0.00253017	0.0221134	-2.08688
2010	EMD	-0.274819	6.6726	-3.25634	0.002532	0.0221134	-2.08755
6218	RPS17	0.220378	9.85984	3.25431	0.00254584	0.0222164	-2.09267
10294	DNAJA2	0.266137	6.63051	3.25356	0.00255097	0.0222433	-2.09456
9575	CLOCK	-0.420861	4.80239	-3.25219	0.00256035	0.0222846	-2.098
6830	SUPT6H	0.406488	5.72419	3.25209	0.00256103	0.0222846	-2.09825
26608	TBL2	-0.457455	4.34792	-3.25198	0.00256185	0.0222846	-2.09855
23170	TTLL12	0.34993	5.88876	3.24617	0.00260209	0.0225725	-2.11317
2224	FDPS	-0.612476	5.71874	-3.24607	0.0026028	0.0225725	-2.11343
387893	KMT5A	-0.428585	5.26432	-3.246	0.00260325	0.0225725	-2.11359
84245	MRI1	-0.512863	3.88484	-3.24592	0.00260384	0.0225725	-2.1138
25914	RTTN	-0.689994	3.33021	-3.24571	0.00260532	0.0225725	-2.11433
11155	LDB3	1.74635	2.01226	3.24437	0.00261464	0.022631	-2.11769
55167	MSL2	-0.36831	5.73706	-3.24415	0.00261623	0.022631	-2.11825
5467	PPARD	-0.52679	4.63826	-3.24351	0.00262073	0.0226519	-2.11987
11094	CACFD1	0.564704	3.75681	3.24285	0.00262536	0.022674	-2.12152
55577	NAGK	0.537468	4.18691	3.24188	0.00263218	0.0227148	-2.12396
116238	TLCD1	-0.854478	2.73584	-3.23589	0.00267478	0.0230642	-2.13901
6812	STXBP1	0.541877	5.07403	3.23402	0.00268821	0.0231616	-2.14371
8019	BRD3	0.263552	8.26192	3.23317	0.00269438	0.0231964	-2.14585
51275	MAPKAPK5-AS1	-0.545577	4.80281	-3.23196	0.00270314	0.0232491	-2.1489
4833	NME4	-0.279459	8.01064	-3.23173	0.00270477	0.0232491	-2.14947
56005	MYDGF	-0.367414	7.19178	-3.22795	0.00273227	0.0234669	-2.15895
51147	ING4	0.435754	3.98331	3.22764	0.00273452	0.0234677	-2.15972
22992	KDM2A	0.373109	6.64844	3.22613	0.00274565	0.0235447	-2.16353
5090	PBX3	-0.241853	6.35735	-3.22487	0.00275487	0.023596	-2.16667
3491	CYR61	-1.26263	2.20996	-3.22472	0.00275598	0.023596	-2.16705
79718	TBL1XR1	-0.251021	6.66494	-3.22071	0.00278575	0.0238297	-2.17711
9146	HGS	-0.339615	6.16372	-3.22045	0.00278766	0.0238297	-2.17776
1798	DPAGT1	-0.38725	5.52328	-3.21847	0.00280247	0.0239376	-2.18272
22859	ADGRL1	-0.272727	7.24454	-3.21752	0.00280958	0.0239762	-2.1851
84140	FAM161A	-0.342027	5.26475	-3.21728	0.0028114	0.0239762	-2.1857
643988	FNDC10	0.448198	4.62564	3.21104	0.00285866	0.0243602	-2.20132
134266	GRPEL2	-0.855777	5.17466	-3.20779	0.00288357	0.0245533	-2.20945
9650	MTFR1	-0.472174	4.76413	-3.20674	0.00289167	0.0245944	-2.21208
57026	PDXP	0.30247	6.17573	3.20658	0.00289293	0.0245944	-2.21248
6128	RPL6	0.232032	9.475	3.20609	0.00289673	0.0246075	-2.21371
5901	RAN	-0.231628	10.2502	-3.20535	0.00290242	0.0246366	-2.21555
8540	AGPS	-0.282201	5.80875	-3.20344	0.00291728	0.0247434	-2.22033
54328	GPR173	0.566556	3.85808	3.20281	0.00292218	0.0247657	-2.22191
168455	CCDC71L	-0.927308	4.38808	-3.2024	0.00292536	0.0247734	-2.22293
404217	CTXN1	0.456402	6.43608	3.20116	0.00293509	0.0248239	-2.22603
79188	TMEM43	0.370439	5.54905	3.20106	0.00293589	0.0248239	-2.22629
8720	MBTPS1	0.235499	5.93506	3.20044	0.00294073	0.0248455	-2.22783
50813	COPS7A	-0.447058	5.5094	-3.19991	0.00294487	0.0248612	-2.22915
388969	C2orf68	-0.42042	5.09779	-3.19908	0.00295138	0.0248968	-2.23122
126003	TRAPPC5	0.281743	6.47042	3.19842	0.00295661	0.0249216	-2.23287
53635	PTOV1	0.407866	6.48158	3.19785	0.00296112	0.024934	-2.2343
59345	GNB4	-0.357788	6.27595	-3.19765	0.00296266	0.024934	-2.23479
64762	GAREM1	-0.499091	3.64401	-3.19699	0.00296788	0.0249586	-2.23644
134429	STARD4	0.471615	5.41108	3.19446	0.00298802	0.0250874	-2.24277
11333	PDAP1	-0.234524	7.27102	-3.19391	0.00299239	0.0250874	-2.24414
199990	FAAP20	0.601966	4.24544	3.1939	0.00299247	0.0250874	-2.24416
94039	ZNF101	-0.586811	3.36033	-3.19371	0.00299398	0.0250874	-2.24463
65244	SPATS2	0.209653	5.9326	3.19361	0.00299472	0.0250874	-2.24487
8861	LDB1	0.682173	4.51002	3.1927	0.003002	0.0251124	-2.24714
23464	GCAT	-0.778987	2.94916	-3.19266	0.00300232	0.0251124	-2.24724
57799	RAB40C	-0.389262	4.58764	-3.18934	0.00302902	0.0253163	-2.25553
102723508	KANTR	0.619512	3.78913	3.18812	0.00303889	0.0253793	-2.25857
113675	SDSL	1.88267	0.467856	3.18739	0.00304482	0.0254093	-2.2604
4782	NFIC	-0.327493	6.8254	-3.18633	0.00305337	0.0254611	-2.26302
8882	ZPR1	-0.329714	5.35811	-3.18492	0.00306494	0.025538	-2.26656
92689	FAM114A1	-0.648694	3.60894	-3.18439	0.00306926	0.0255545	-2.26788
348	APOE	1.62984	2.6228	3.18342	0.00307713	0.0256004	-2.27027
1744	DLSTP1	0.267311	6.07992	3.18307	0.00308006	0.0256052	-2.27116
55658	RNF126	-0.306919	6.92448	-3.18203	0.00308858	0.0256564	-2.27375
55471	NDUFAF7	-0.480947	4.19475	-3.18042	0.00310183	0.0257469	-2.27775
58480	RHOU	0.854098	5.49414	3.17789	0.00312277	0.0259009	-2.28405
138162	C9orf116	-0.654216	3.73724	-3.1764	0.00313518	0.025984	-2.28776
51013	EXOSC1	-0.308483	5.66498	-3.17574	0.00314069	0.0260007	-2.2894
51495	HACD3	0.245478	8.7463	3.17547	0.00314297	0.0260007	-2.29008
90592	ZNF700	-0.698998	2.97779	-3.1753	0.00314436	0.0260007	-2.29049
55839	CENPN	-0.381208	5.60984	-3.17484	0.00314817	0.0260124	-2.29163
2058	EPRS	-0.417016	8.66626	-3.17334	0.00316075	0.026095	-2.29536
116151	FAM210B	0.364417	5.11207	3.17308	0.00316296	0.026095	-2.29601
55279	ZNF654	0.549032	3.39461	3.17232	0.00316938	0.0261282	-2.29791
9092	SART1	0.384063	5.5541	3.17183	0.00317346	0.0261389	-2.29911
55280	CWF19L1	-0.423712	4.29186	-3.17159	0.00317548	0.0261389	-2.29971
4137	MAPT	0.967212	2.07134	3.17107	0.00317995	0.0261559	-2.30102
513	ATP5D	0.466837	6.06639	3.16998	0.00318914	0.0262116	-2.30372
153396	TMEM161B	-0.50669	3.81954	-3.16934	0.00319459	0.0262366	-2.30532
3157	HMGCS1	-0.629904	8.32547	-3.1689	0.00319827	0.0262471	-2.30639
9252	RPS6KA5	0.667259	3.36206	3.16848	0.00320184	0.0262565	-2.30744
1642	DDB1	-0.253119	8.34366	-3.1671	0.00321367	0.0263337	-2.31088
23677	SH3BP4	-0.473809	4.73764	-3.16469	0.00323429	0.0264827	-2.31687
10535	RNASEH2A	-0.245933	6.62213	-3.1637	0.00324276	0.0265321	-2.31931
114791	TUBGCP5	-0.666928	2.89705	-3.16337	0.00324561	0.0265355	-2.32013
125061	AFMID	-0.378423	5.63217	-3.16235	0.00325442	0.0265875	-2.32267
6827	SUPT4H1	0.401738	4.56199	3.15827	0.00328989	0.0268557	-2.3328
6897	TARS	-0.392471	8.53299	-3.158	0.00329218	0.0268557	-2.33345
23240	KIAA0922	0.413211	5.1464	3.15647	0.0033056	0.026945	-2.33725
84498	FAM120B	0.48121	3.85584	3.15534	0.0033155	0.0270055	-2.34005
55308	DDX19A	-0.321757	5.61214	-3.15289	0.00333713	0.0271613	-2.34613
91782	CHMP7	0.436481	4.67159	3.14862	0.00337509	0.0274497	-2.3567
11226	GALNT6	-0.672149	3.58199	-3.14776	0.00338278	0.0274539	-2.35882
4201	MEA1	-0.397839	4.48754	-3.14773	0.00338311	0.0274539	-2.35891
26086	GPSM1	-0.344503	6.13562	-3.14772	0.00338317	0.0274539	-2.35893
23518	R3HDM1	-0.298112	6.18903	-3.14718	0.00338799	0.0274725	-2.36026
5764	PTN	0.344849	7.72859	3.14519	0.0034059	0.0275972	-2.36519
567	B2M	0.355867	9.80392	3.14318	0.00342406	0.0277237	-2.37016
122416	ANKRD9	-0.462258	4.47199	-3.14283	0.00342722	0.0277286	-2.37102
2820	GPD2	-0.416309	4.74133	-3.14243	0.00343093	0.027738	-2.37203
55582	KIF27	0.526082	4.51761	3.13998	0.00345321	0.0278974	-2.37808
55388	MCM10	-0.340776	6.83535	-3.13533	0.003496	0.0281848	-2.38958
598	BCL2L1	0.448333	5.00699	3.13527	0.00349654	0.0281848	-2.38972
399818	METTL10	-0.489459	4.06218	-3.13527	0.00349656	0.0281848	-2.38973
7991	TUSC3	0.209881	6.5805	3.13404	0.00350788	0.0282469	-2.39274
51078	THAP4	-0.360158	5.69589	-3.13388	0.00350945	0.0282469	-2.39316
23019	CNOT1	-0.331949	6.42113	-3.13306	0.00351702	0.0282533	-2.39517
6342	SCP2	0.395997	6.19183	3.13299	0.00351765	0.0282533	-2.39534
2787	GNG5	-0.209241	7.79908	-3.13295	0.00351803	0.0282533	-2.39544
57205	ATP10D	0.59758	3.74798	3.13102	0.00353606	0.0283772	-2.40022
9378	NRXN1	0.564675	2.9964	3.12973	0.00354812	0.0284529	-2.4034
23284	ADGRL3	0.671139	3.23759	3.12893	0.00355566	0.0284553	-2.40538
7760	ZNF213	-0.496348	3.67125	-3.12888	0.0035561	0.0284553	-2.40549
254552	NUDT8	-0.925724	2.03634	-3.12886	0.00355626	0.0284553	-2.40554
463	ZFHX3	0.36496	5.8664	3.12563	0.00358678	0.0286316	-2.41351
51106	TFB1M	-0.515295	4.95686	-3.12549	0.00358813	0.0286316	-2.41387
8737	RIPK1	0.632039	3.80011	3.12523	0.00359055	0.0286316	-2.41449
51435	SCARA3	-0.452818	5.1188	-3.12515	0.00359131	0.0286316	-2.41469
441478	NRARP	-0.806788	2.89073	-3.12491	0.00359362	0.0286316	-2.41529
6181	RPLP2	0.635084	8.67164	3.12486	0.00359408	0.0286316	-2.41541
9217	VAPB	0.245443	6.71182	3.12274	0.00361422	0.028771	-2.42063
100885848	PTGES3L	-0.892579	2.55468	-3.12137	0.00362732	0.0288542	-2.42401
8826	IQGAP1	-0.298971	6.48237	-3.1202	0.00363858	0.0289226	-2.4269
80036	TRPM3	-0.620091	4.23801	-3.11956	0.0036447	0.0289501	-2.42847
23229	ARHGEF9	-0.445351	4.10167	-3.11874	0.00365258	0.0289915	-2.43048
400629	TEX19	-0.963356	3.40203	-3.11786	0.00366108	0.0290378	-2.43265
51633	OTUD6B	0.428176	4.23452	3.11729	0.00366658	0.0290401	-2.43405
3178	HNRNPA1	0.388851	9.24939	3.11728	0.00366671	0.0290401	-2.43409
11127	KIF3A	0.28355	6.45794	3.11569	0.00368215	0.0291412	-2.43801
955	ENTPD6	-0.346529	4.38807	-3.11478	0.00369096	0.0291807	-2.44024
92979	MARCH9	0.440781	4.38693	3.11462	0.00369251	0.0291807	-2.44063
404636	FAM45A	-0.480686	4.29981	-3.11433	0.0036954	0.0291824	-2.44136
56672	AKIP1	-0.475242	4.4654	-3.11332	0.00370525	0.029239	-2.44384
4001	LMNB1	-0.228893	7.94231	-3.11238	0.00371444	0.0292902	-2.44615
9232	PTTG1	-0.358929	8.23906	-3.11093	0.0037286	0.0293806	-2.4497
6182	MRPL12	0.512476	5.66651	3.11063	0.00373158	0.0293828	-2.45045
2899	GRIK3	0.749962	2.951	3.11023	0.00373556	0.0293929	-2.45144
10069	RWDD2B	0.405675	5.49216	3.10938	0.00374391	0.0294332	-2.45353
55095	SAMD4B	-0.284857	6.83421	-3.10885	0.00374911	0.0294332	-2.45482
10267	RAMP1	0.740923	4.71509	3.10874	0.00375019	0.0294332	-2.45509
90379	DCAF15	0.556506	4.05715	3.10861	0.0037515	0.0294332	-2.45542
25895	METTL21B	-1.01023	2.21416	-3.10821	0.00375546	0.029443	-2.4564
5829	PXN	-0.38459	5.29199	-3.10704	0.00376706	0.0295127	-2.45928
442213	PTCHD4	-1.16782	1.87654	-3.10669	0.00377055	0.0295188	-2.46014
83475	DOHH	0.551618	4.31409	3.106	0.00377737	0.0295509	-2.46183
9414	TJP2	0.592987	3.59273	3.10539	0.00378349	0.0295776	-2.46334
54969	HPF1	-0.311074	6.30538	-3.10474	0.00378992	0.0296065	-2.46492
10549	PRDX4	-0.269307	6.6817	-3.10315	0.00380589	0.0297099	-2.46884
1952	CELSR2	0.536635	4.9459	3.10252	0.00381215	0.0297214	-2.47037
1200	TPP1	-0.479394	4.43316	-3.10246	0.00381282	0.0297214	-2.47054
51308	REEP2	-0.578331	3.50815	-3.1008	0.00382953	0.029823	-2.47462
94015	TTYH2	0.544135	2.7263	3.10034	0.00383411	0.029823	-2.47573
57593	EBF4	0.561782	3.01336	3.10026	0.00383493	0.029823	-2.47593
144983	HNRNPA1L2	0.513283	3.5179	3.10007	0.00383682	0.029823	-2.47639
57689	LRRC4C	-2.05322	2.19702	-3.09596	0.0038786	0.0301263	-2.48649
949	SCARB1	-0.553275	4.94466	-3.09563	0.00388191	0.0301305	-2.48728
3992	FADS1	-0.18579	9.03344	-3.09519	0.00388641	0.0301439	-2.48836
6198	RPS6KB1	0.249594	5.35932	3.09456	0.0038929	0.0301728	-2.48992
57664	PLEKHA4	-0.738849	4.33559	-3.09264	0.00391263	0.0303041	-2.49463
84265	POLR3GL	0.424705	6.54659	3.09164	0.00392289	0.0303619	-2.49707
9678	PHF14	0.22749	8.48968	3.09049	0.00393475	0.0304321	-2.49989
25880	TMEM186	-0.328019	4.8007	-3.08847	0.00395568	0.0305698	-2.50483
51363	CHST15	-0.417557	4.30758	-3.08823	0.00395818	0.0305698	-2.50542
641638	SNHG6	-0.584027	4.83456	-3.08532	0.00398862	0.0307831	-2.51256
6046	BRD2	0.281889	6.8925	3.08347	0.00400799	0.0309107	-2.51708
2733	GLE1	-0.341981	6.63405	-3.07887	0.00405676	0.0312647	-2.52835
283871	PGP	-0.385101	6.26414	-3.07738	0.00407268	0.0313651	-2.53199
100463486	MTRNR2L8	0.713419	10.1936	3.07695	0.00407721	0.0313778	-2.53303
6416	MAP2K4	0.391386	4.02607	3.07646	0.00408252	0.0313964	-2.53424
221150	SKA3	-0.317295	5.39483	-3.07545	0.00409327	0.0314569	-2.53669
577	ADGRB3	0.700381	3.24017	3.07489	0.00409931	0.031481	-2.53807
51286	CEND1	0.881482	3.55089	3.07432	0.0041055	0.0315064	-2.53947
26053	AUTS2	0.329298	6.73743	3.07351	0.00411421	0.031551	-2.54145
79918	SETD6	-0.486602	4.41118	-3.07286	0.00412119	0.0315823	-2.54303
6804	STX1A	1.04381	2.62886	3.07252	0.00412483	0.0315879	-2.54385
1070	CETN3	0.504167	4.26146	3.07083	0.00414323	0.0317065	-2.54799
83443	SF3B5	0.256517	8.71882	3.07039	0.00414794	0.0317202	-2.54905
22989	MYH15	1.05527	2.4618	3.07005	0.00415164	0.0317262	-2.54988
3190	HNRNPK	0.199965	8.28759	3.0696	0.00415653	0.0317413	-2.55098
286097	MICU3	0.488205	3.91805	3.06876	0.00416574	0.0317893	-2.55304
10560	SLC19A2	1.48342	2.47295	3.0675	0.00417954	0.0318619	-2.55612
10591	DNPH1	-0.409434	6.87234	-3.06735	0.00418111	0.0318619	-2.55647
23623	RUSC1	-0.296863	6.19269	-3.06617	0.00419412	0.0319387	-2.55936
8394	PIP5K1A	-0.218206	7.91925	-3.06565	0.00419978	0.0319594	-2.56062
55556	ENOSF1	-0.661865	3.8773	-3.06341	0.00422458	0.0321042	-2.5661
284648	LOC284648	-1.50615	1.21877	-3.06318	0.00422707	0.0321042	-2.56665
100124538	SNORA70C	0.405313	8.76026	3.06313	0.00422766	0.0321042	-2.56678
132001	TAMM41	-0.362175	4.8204	-3.06225	0.00423743	0.032156	-2.56893
1277	COL1A1	-0.530561	5.60271	-3.0611	0.0042502	0.0322304	-2.57173
122060	SLAIN1	0.381833	5.61938	3.06063	0.00425543	0.0322477	-2.57287
84861	KLHL22	-0.400369	4.62745	-3.05964	0.00426642	0.0322979	-2.57527
286075	ZNF707	-0.489218	4.75951	-3.0595	0.00426799	0.0322979	-2.57562
3764	KCNJ8	-0.382987	4.92632	-3.05773	0.00428778	0.032425	-2.57992
26994	RNF11	0.206796	5.81536	3.05629	0.00430405	0.0325083	-2.58345
26227	PHGDH	-0.84421	7.57038	-3.05622	0.00430476	0.0325083	-2.5836
84248	FYTTD1	0.372892	5.7177	3.05566	0.00431108	0.0325228	-2.58497
55827	DCAF6	0.312269	5.60926	3.05552	0.00431266	0.0325228	-2.58531
80018	NAA25	-0.267962	5.75113	-3.05461	0.00432294	0.0325777	-2.58752
51809	GALNT7	0.453606	4.32842	3.05411	0.00432862	0.032598	-2.58875
9652	TTC37	0.340107	6.17801	3.05178	0.00435512	0.0327748	-2.59443
113026	PLCD3	-0.611543	3.95268	-3.05108	0.00436308	0.0328121	-2.59613
220042	DDIAS	-0.461348	3.91298	-3.05021	0.00437299	0.0328638	-2.59824
375035	SFT2D2	-0.797703	3.07212	-3.04515	0.00443121	0.0332784	-2.61054
1632	ECI1	-0.375613	6.30297	-3.04324	0.00445334	0.0334139	-2.61518
51562	MBIP	0.576138	3.46123	3.04284	0.00445805	0.0334139	-2.61616
11335	CBX3	0.205951	9.29079	3.0428	0.00445846	0.0334139	-2.61624
100506054	RNASEH1-AS1	-0.382644	4.87798	-3.04194	0.00446853	0.0334663	-2.61834
55652	SLC48A1	-0.793512	4.50274	-3.04167	0.00447171	0.0334671	-2.619
8451	CUL4A	-0.264727	6.19225	-3.03862	0.00450741	0.0336907	-2.6264
115701	ALPK2	-1.75386	2.08398	-3.03833	0.00451079	0.0336907	-2.6271
323	APBB2	0.619397	3.54251	3.03833	0.00451088	0.0336907	-2.62712
2590	GALNT2	0.616508	6.20708	3.03745	0.00452116	0.0337444	-2.62923
122704	MRPL52	0.267919	6.63659	3.03593	0.00453916	0.0338379	-2.63293
8550	MAPKAPK5	-0.303206	5.99198	-3.03567	0.00454223	0.0338379	-2.63356
79709	COLGALT1	-0.374303	6.32895	-3.03561	0.00454302	0.0338379	-2.63372
81533	ITFG1	0.297911	5.02492	3.03449	0.00455627	0.0339134	-2.63643
29080	CCDC59	-0.298347	7.41534	-3.03406	0.00456133	0.0339278	-2.63746
83693	HSDL1	0.35592	4.85696	3.0335	0.00456806	0.0339546	-2.63883
255758	TCTEX1D2	-0.370641	5.4632	-3.03189	0.00458726	0.0340604	-2.64273
7301	TYRO3	-0.432442	4.62789	-3.03178	0.00458854	0.0340604	-2.64299
349136	WDR86	0.752133	2.04977	3.03122	0.00459533	0.0340875	-2.64436
56034	PDGFC	-0.704977	3.96641	-3.02991	0.00461099	0.0341803	-2.64752
9021	SOCS3	0.881918	3.89524	3.02873	0.00462514	0.0342619	-2.65037
26960	NBEA	-0.311034	6.61326	-3.02833	0.00462996	0.0342743	-2.65134
8239	USP9X	0.244921	6.43256	3.02801	0.00463388	0.03428	-2.65213
10928	RALBP1	-0.293749	6.65221	-3.02724	0.00464324	0.0343259	-2.654
10885	WDR3	0.286376	6.64987	3.02594	0.00465898	0.0344097	-2.65715
10797	MTHFD2	-0.828607	7.94837	-3.02578	0.0046609	0.0344097	-2.65753
23592	LEMD3	0.438535	4.65037	3.02209	0.00470586	0.0347002	-2.66646
65009	NDRG4	-0.597821	5.6132	-3.02203	0.00470663	0.0347002	-2.66661
5140	PDE3B	0.550794	3.91818	3.02119	0.00471688	0.0347466	-2.66863
4957	ODF2	-0.373962	4.80601	-3.021	0.00471931	0.0347466	-2.66911
8318	CDC45	-0.426309	5.08715	-3.02067	0.0047233	0.0347525	-2.66989
162972	ZNF550	-1.78247	0.369973	-3.01837	0.00475167	0.0348625	-2.67546
2286	FKBP2	-0.23708	6.56979	-3.01827	0.0047529	0.0348625	-2.6757
134637	ADAT2	-0.653997	3.96882	-3.01819	0.00475386	0.0348625	-2.67589
387841	RPL13AP20	1.09446	7.99514	3.01819	0.00475389	0.0348625	-2.67589
5152	PDE9A	0.529324	3.98662	3.01816	0.00475427	0.0348625	-2.67597
55630	SLC39A4	-0.586441	4.31136	-3.01766	0.00476043	0.0348842	-2.67717
128239	IQGAP3	-0.347751	5.70673	-3.01688	0.00477016	0.0349319	-2.67907
7564	ZNF16	-0.614116	3.5666	-3.01584	0.00478303	0.0350017	-2.68157
30011	SH3KBP1	-0.642005	5.36498	-3.01534	0.00478931	0.0350017	-2.68279
201965	RWDD4	-0.308624	5.75596	-3.01517	0.00479137	0.0350017	-2.68319
6712	SPTBN2	0.540651	5.22253	3.01508	0.00479256	0.0350017	-2.68342
8642	DCHS1	0.57617	4.56332	3.01405	0.00480532	0.0350714	-2.68589
11130	ZWINT	-0.303241	6.02401	-3.01356	0.00481155	0.0350933	-2.68709
10302	SNAPC5	-0.327844	4.8282	-3.01277	0.00482138	0.0351315	-2.68899
412	STS	0.753467	2.60459	3.01262	0.00482324	0.0351315	-2.68935
78992	YIPF2	-0.498497	3.61656	-3.01219	0.00482862	0.0351472	-2.69038
488	ATP2A2	-0.275036	7.61147	-3.01094	0.00484437	0.0352382	-2.69341
1636	ACE	-0.970724	3.25571	-3.00958	0.00486156	0.0353327	-2.6967
7322	UBE2D2	-0.207942	8.023	-3.00931	0.00486498	0.0353327	-2.69735
340527	NHSL2	0.708871	4.49847	3.00914	0.00486709	0.0353327	-2.69775
81624	DIAPH3	-0.387019	5.79446	-3.00706	0.00489346	0.0355004	-2.70277
85021	REPS1	0.264461	6.52924	3.0058	0.00490958	0.0355832	-2.70583
139189	DGKK	-1.1897	-0.370405	-3.00565	0.00491141	0.0355832	-2.70617
27000	DNAJC2	-0.288685	6.95948	-3.00405	0.00493187	0.0357077	-2.71003
26267	FBXO10	0.375728	4.85404	3.00191	0.00495939	0.035883	-2.7152
4204	MECP2	0.26767	5.56483	3.00124	0.00496798	0.0359027	-2.71681
10785	WDR4	-0.421568	5.37923	-3.00119	0.00496871	0.0359027	-2.71694
643338	C15orf62	1.23767	1.6202	3.00032	0.00497983	0.0359574	-2.71902
3720	JARID2	0.271104	7.57972	2.99998	0.00498425	0.0359574	-2.71984
22978	NT5C2	0.312365	4.96938	2.99983	0.00498618	0.0359574	-2.7202
2109	ETFB	0.346593	6.48081	2.99817	0.00500778	0.0360892	-2.72421
55159	RFWD3	-0.327606	5.60054	-2.99744	0.00501727	0.0361336	-2.72597
284900	TTC28-AS1	-0.554063	3.91396	-2.99608	0.00503503	0.0362375	-2.72925
1944	EFNA3	0.559077	5.05581	2.99544	0.00504334	0.0362734	-2.73078
81857	MED25	-0.411738	5.75733	-2.99502	0.00504881	0.0362887	-2.73179
100996763	LOC100996763	-0.563058	4.05257	-2.99405	0.00506159	0.0363566	-2.73413
100861468	LINC00492	-1.77633	-0.489645	-2.99284	0.00507741	0.0364257	-2.73703
127833	SYT2	-0.79194	3.31858	-2.99281	0.00507791	0.0364257	-2.73712
125058	TBC1D16	-0.317045	6.54656	-2.99221	0.00508574	0.0364578	-2.73855
8463	TEAD2	-0.431792	6.54791	-2.99155	0.00509449	0.0364965	-2.74015
9919	SEC16A	-0.329087	5.7516	-2.99017	0.00511272	0.0365967	-2.74346
11031	RAB31	0.342589	5.7053	2.98998	0.0051152	0.0365967	-2.74391
4163	MCC	0.535007	5.75786	2.98884	0.0051304	0.0366813	-2.74666
9908	G3BP2	0.283713	6.97909	2.98759	0.00514708	0.0367764	-2.74967
54529	ASNSD1	0.598715	5.37062	2.98596	0.00516881	0.0369074	-2.75358
10920	COPS8	0.322477	6.85693	2.98506	0.0051808	0.0369688	-2.75573
9837	GINS1	-0.346924	5.50809	-2.98115	0.00523352	0.0373206	-2.76513
5144	PDE4D	0.644204	4.21133	2.98027	0.00524553	0.0373817	-2.76725
80025	PANK2	-0.283662	5.71304	-2.97946	0.00525645	0.0374314	-2.76918
9118	INA	0.488913	6.52656	2.97925	0.00525938	0.0374314	-2.7697
988	CDC5L	0.23139	7.23727	2.97812	0.00527475	0.0375162	-2.7724
7762	ZNF215	-1.45989	0.0421017	-2.9774	0.00528465	0.0375621	-2.77414
51228	GLTP	-0.395904	5.16346	-2.97651	0.0052967	0.0376231	-2.77625
780	DDR1	-0.596199	3.4703	-2.97606	0.00530293	0.0376428	-2.77734
6050	RNH1	-0.299663	5.22164	-2.97315	0.00534304	0.0379028	-2.78433
10455	ECI2	-0.36241	5.31024	-2.97252	0.00535174	0.0379398	-2.78584
100293516	ZNF587B	-0.637653	2.52101	-2.96811	0.00541301	0.0383492	-2.79639
2194	FASN	-0.446276	9.17259	-2.96515	0.00545454	0.0386183	-2.80348
54491	FAM105A	-0.648427	4.46677	-2.96462	0.00546203	0.0386313	-2.80475
1662	DDX10	-0.279808	6.6997	-2.96452	0.00546348	0.0386313	-2.805
150946	GAREM2	-0.459149	4.30463	-2.96287	0.00548676	0.0387707	-2.80894
6237	RRAS	-0.689417	2.70914	-2.96169	0.00550344	0.0388546	-2.81175
51514	DTL	-0.231641	7.06293	-2.96153	0.00550577	0.0388546	-2.81214
54471	MIEF1	-0.219702	7.15953	-2.96033	0.00552283	0.0389497	-2.81501
5164	PDK2	0.381204	4.4746	2.95965	0.00553248	0.0389925	-2.81663
6341	SCO1	-0.287334	4.816	-2.9585	0.00554904	0.0390716	-2.8194
57085	AGTRAP	-0.407034	3.72118	-2.95837	0.00555088	0.0390716	-2.8197
54841	BIVM	-0.32124	4.97497	-2.95751	0.00556313	0.0391325	-2.82174
65993	MRPS34	-0.236724	7.51577	-2.95619	0.00558211	0.0392406	-2.8249
8985	PLOD3	-0.405787	4.6955	-2.95547	0.00559255	0.0392886	-2.82663
4093	SMAD9	0.379448	6.67006	2.95477	0.00560258	0.0393138	-2.82829
79158	GNPTAB	0.409773	4.67068	2.9546	0.00560505	0.0393138	-2.8287
57103	TIGAR	-1.45989	0.550833	-2.95438	0.00560829	0.0393138	-2.82923
1838	DTNB	-0.460571	4.3734	-2.95421	0.00561071	0.0393138	-2.82963
25945	NECTIN3	-0.401371	5.81449	-2.95397	0.00561419	0.0393138	-2.83021
114790	STK11IP	-0.473778	3.41926	-2.95092	0.00565844	0.0395981	-2.83748
254427	PROSER2	-0.559211	3.42464	-2.95052	0.00566437	0.0396084	-2.83845
27319	BHLHE22	-1.46761	1.68466	-2.95032	0.00566719	0.0396084	-2.83891
2026	ENO2	-0.488335	7.20281	-2.94901	0.00568643	0.0397174	-2.84205
2535	FZD2	0.316291	6.33586	2.94821	0.00569807	0.0397488	-2.84395
138649	ANKRD19P	-0.301186	7.2372	-2.9482	0.00569823	0.0397488	-2.84397
6844	VAMP2	0.403123	5.16777	2.94722	0.00571267	0.0397997	-2.84632
23193	GANAB	-0.258317	8.53791	-2.94721	0.00571284	0.0397997	-2.84634
51520	LARS	-0.355367	7.40815	-2.94569	0.00573527	0.0399304	-2.84997
22856	CHSY1	0.326747	5.92241	2.94539	0.00573965	0.0399353	-2.85068
100996301	FOXD3-AS1	1.29301	2.81884	2.94478	0.00574866	0.0399724	-2.85213
9923	ZBTB40	0.501079	4.43205	2.94421	0.00575708	0.0400055	-2.85349
387103	CENPW	-0.327505	6.41163	-2.94368	0.00576492	0.0400344	-2.85474
203259	FAM219A	-0.947947	2.17949	-2.9417	0.00579433	0.040213	-2.85946
728294	D2HGDH	-0.584561	4.17516	-2.941	0.00580488	0.0402605	-2.86114
11311	VPS45	-0.252359	6.29036	-2.93973	0.00582381	0.0403155	-2.86415
83463	MXD3	-0.568682	3.9341	-2.93973	0.00582385	0.0403155	-2.86416
10635	RAD51AP1	-0.351948	6.07263	-2.93972	0.00582392	0.0403155	-2.86417
55017	C14orf119	0.289063	5.89806	2.93859	0.00584088	0.0404072	-2.86686
53615	MBD3	0.350165	5.32893	2.93778	0.00585308	0.0404659	-2.8688
91137	SLC25A46	0.255854	5.39476	2.93743	0.00585833	0.0404764	-2.86962
4218	RAB8A	0.288456	6.14516	2.93682	0.00586754	0.0405143	-2.87108
4793	NFKBIB	-0.449052	4.52009	-2.93563	0.00588551	0.0406126	-2.87391
84549	MAK16	-0.506644	4.20281	-2.93514	0.00589298	0.0406352	-2.87508
64223	MLST8	-0.719406	2.56286	-2.93492	0.00589625	0.0406352	-2.8756
25847	ANAPC13	0.324456	6.30203	2.93466	0.00590031	0.0406375	-2.87623
30850	CDR2L	-0.381071	5.36512	-2.93422	0.00590685	0.0406411	-2.87726
5230	PGK1	-0.61227	8.66262	-2.93413	0.0059083	0.0406411	-2.87749
9039	UBA3	0.313155	5.06888	2.93373	0.00591436	0.040657	-2.87843
26220	DGCR5	-1.00162	2.04145	-2.93322	0.00592215	0.0406722	-2.87965
57472	CNOT6	-0.249207	6.67333	-2.93309	0.00592405	0.0406722	-2.87995
84068	SLC10A7	-0.602932	2.80765	-2.93208	0.00593948	0.0407524	-2.88236
2280	FKBP1A	0.222186	8.76314	2.93118	0.00595321	0.0408209	-2.88449
2037	EPB41L2	-0.253617	6.62499	-2.93009	0.00596993	0.0409098	-2.88709
53340	SPA17	-0.448166	3.68303	-2.92672	0.00602185	0.0412396	-2.8951
414777	HCG18	0.534535	3.43094	2.92625	0.00602909	0.0412469	-2.89621
55092	TMEM51	-0.32988	5.19219	-2.92616	0.0060305	0.0412469	-2.89643
89781	HPS4	-0.309322	5.48671	-2.92542	0.0060419	0.041299	-2.89817
6305	SBF1	-0.31027	6.38116	-2.92477	0.00605198	0.0413419	-2.89972
53335	BCL11A	0.238918	6.88156	2.92263	0.00608537	0.0415439	-2.90481
83461	CDCA3	-0.393597	5.74101	-2.92215	0.00609279	0.0415685	-2.90593
9631	NUP155	-0.269086	5.04838	-2.92074	0.00611495	0.0416935	-2.90929
57019	CIAPIN1	0.250025	6.43138	2.92039	0.00612036	0.0417043	-2.91011
10900	RUNDC3A	0.628302	4.83271	2.91872	0.00614664	0.0418572	-2.91407
64423	INF2	-0.35801	4.44426	-2.91839	0.00615182	0.0418663	-2.91485
51493	RTCB	-0.247321	6.60222	-2.91692	0.00617515	0.0419987	-2.91835
10396	ATP8A1	0.474755	5.34146	2.91549	0.0061977	0.0421258	-2.92172
10336	PCGF3	-0.294996	6.16409	-2.91464	0.00621134	0.0421839	-2.92375
5198	PFAS	-0.325731	5.77633	-2.91435	0.00621593	0.0421839	-2.92443
197335	WDR90	-0.602535	5.0147	-2.91406	0.00622051	0.0421839	-2.92512
5422	POLA1	-0.330842	6.09255	-2.91398	0.00622175	0.0421839	-2.9253
6637	SNRPG	-0.381781	8.35614	-2.91166	0.00625881	0.0424087	-2.93079
267020	ATP5L2	-0.638439	3.49463	-2.91083	0.00627215	0.0424726	-2.93276
10135	NAMPT	-0.424187	5.272	-2.91021	0.0062821	0.0425135	-2.93422
646817	SETSIP	-0.31876	8.14186	-2.90993	0.00628661	0.0425176	-2.93489
51091	SEPSECS	0.641608	2.97468	2.90953	0.00629303	0.0425343	-2.93583
54973	CPSF3L	-0.698572	3.41338	-2.9093	0.00629689	0.0425343	-2.9364
266655	LINC00094	-0.340964	4.61671	-2.90758	0.00632459	0.0426949	-2.94045
26130	GAPVD1	0.270401	9.5097	2.90694	0.00633503	0.0427199	-2.94198
84631	SLITRK2	-0.545073	-0.190016	-2.90687	0.00633615	0.0427199	-2.94214
6576	SLC25A1	-0.341713	6.16961	-2.90479	0.00636991	0.042921	-2.94705
23548	TTC33	-0.444219	3.97611	-2.90392	0.00638407	0.0429674	-2.9491
54753	ZNF853	-0.371847	4.96477	-2.90369	0.00638777	0.0429674	-2.94964
57583	TMEM181	0.205633	6.51051	2.90353	0.0063904	0.0429674	-2.95002
7385	UQCRC2	-0.272487	6.83097	-2.9034	0.00639259	0.0429674	-2.95034
2319	FLOT2	0.330286	5.7741	2.9029	0.00640076	0.0429957	-2.95152
80142	PTGES2	-0.374458	5.17189	-2.9025	0.00640725	0.0430098	-2.95245
10313	RTN3	0.307013	7.26336	2.90229	0.00641076	0.0430098	-2.95296
51507	RTFDC1	0.186371	6.8401	2.90137	0.00642589	0.0430848	-2.95514
27044	SND1	-0.280254	7.15491	-2.90092	0.00643319	0.0430903	-2.95619
23024	PDZRN3	0.654225	4.7602	2.90074	0.00643615	0.0430903	-2.95661
26015	RPAP1	-0.342664	5.95909	-2.9006	0.0064386	0.0430903	-2.95696
4885	NPTX2	1.17258	2.14141	2.90016	0.00644574	0.0431116	-2.95799
284702	NA	-0.812886	3.95261	-2.89905	0.00646401	0.0432072	-2.9606
790	CAD	-0.325259	6.13554	-2.89872	0.00646951	0.0432174	-2.96139
123263	MTFMT	-0.323757	4.85311	-2.89821	0.00647799	0.0432476	-2.9626
10943	MSL3	-0.251799	5.79034	-2.89716	0.0064953	0.0433307	-2.96506
54901	CDKAL1	-0.480295	4.65015	-2.89682	0.00650099	0.0433307	-2.96587
283237	TTC9C	-0.453226	3.77525	-2.89674	0.0065024	0.0433307	-2.96607
3633	INPP5B	-0.463892	4.15722	-2.8962	0.00651135	0.0433639	-2.96734
2677	GGCX	-0.304922	4.90288	-2.89484	0.00653401	0.0434881	-2.97055
100500804	MIR3654	0.301827	8.54514	2.89435	0.00654221	0.0435161	-2.97171
55101	ATP5SL	-0.296225	6.13661	-2.89346	0.00655705	0.0435742	-2.9738
5434	POLR2E	-0.2659	8.48737	-2.89335	0.00655895	0.0435742	-2.97407
7918	GPANK1	-0.444056	3.79191	-2.89257	0.0065719	0.0436084	-2.97589
84804	MFSD9	0.369711	3.43949	2.89256	0.00657212	0.0436084	-2.97592
23318	ZCCHC11	0.317192	6.33854	2.89204	0.00658085	0.0436397	-2.97715
55512	SMPD3	0.711104	2.55435	2.89172	0.0065863	0.0436493	-2.97791
8609	KLF7	-0.426136	6.88776	-2.89134	0.00659266	0.0436648	-2.9788
114884	OSBPL10	0.809843	2.3817	2.8904	0.00660847	0.0436955	-2.98101
84656	GLYR1	0.398503	5.95058	2.89036	0.00660911	0.0436955	-2.9811
153364	MBLAC2	0.554656	4.39604	2.89019	0.00661208	0.0436955	-2.98152
55676	SLC30A6	-0.313316	4.78468	-2.89011	0.00661335	0.0436955	-2.9817
85456	TNKS1BP1	-0.404395	4.86131	-2.88926	0.00662771	0.0437498	-2.9837
81847	RNF146	0.458549	5.17928	2.88887	0.00663431	0.0437498	-2.98462
23505	TMEM131	0.298937	4.84543	2.8888	0.00663552	0.0437498	-2.98479
8828	NRP2	0.487455	4.45924	2.88867	0.00663765	0.0437498	-2.98508
2581	GALC	-0.340985	5.31365	-2.88814	0.00664671	0.043783	-2.98634
100506783	HOXD-AS2	-0.465762	4.12672	-2.88738	0.00665966	0.0438418	-2.98814
400720	ZNF772	-0.842672	1.95099	-2.88661	0.00667268	0.0439009	-2.98994
90550	MCU	-0.441028	4.09393	-2.88616	0.00668039	0.0439251	-2.99101
222537	HS3ST5	0.716774	2.81855	2.88573	0.00668761	0.043946	-2.99201
55601	DDX60	-1.17902	2.57941	-2.88534	0.0066944	0.0439641	-2.99294
79707	NOL9	0.496997	4.49531	2.88262	0.0067409	0.0442427	-2.99933
79902	NUP85	-0.26213	7.11922	-2.88217	0.00674867	0.044267	-3.0004
2259	FGF14	0.958158	2.89159	2.88189	0.00675344	0.0442716	-3.00105
90231	KIAA2013	-0.3072	6.53865	-2.88104	0.00676819	0.0443416	-3.00306
57578	UNC79	0.837177	2.40342	2.88079	0.00677252	0.0443433	-3.00365
23597	ACOT9	-0.333758	3.89095	-2.87979	0.00678972	0.0444292	-3.00599
9270	ITGB1BP1	-0.328474	6.31238	-2.87933	0.0067977	0.0444547	-3.00708
83742	MARVELD1	0.431095	4.84672	2.87673	0.00684296	0.0447238	-3.0132
9200	HACD1	-0.376246	4.90679	-2.87612	0.00685345	0.0447655	-3.01461
4088	SMAD3	-0.494446	5.23053	-2.87582	0.00685871	0.0447729	-3.01532
6613	SUMO2	0.281043	7.8964	2.87429	0.00688544	0.0449205	-3.01891
79031	PDCL3	0.63411	4.01653	2.87325	0.00690372	0.0450127	-3.02136
8542	APOL1	-0.89129	3.20715	-2.87282	0.00691133	0.0450354	-3.02237
1745	DLX1	2.04085	0.261488	2.87231	0.00692031	0.0450449	-3.02357
78988	MRPL57	0.42145	4.23594	2.87224	0.00692155	0.0450449	-3.02374
79598	CEP97	-0.400584	5.27366	-2.87186	0.00692829	0.0450449	-3.02463
5334	PLCL1	1.44696	1.11722	2.87166	0.00693172	0.0450449	-3.02509
9991	PTBP3	-0.300161	5.85931	-2.87156	0.00693349	0.0450449	-3.02533
8906	AP1G2	0.65252	3.06234	2.87069	0.00694891	0.0451182	-3.02738
55027	HEATR3	-0.347932	4.98811	-2.86855	0.00698691	0.0453379	-3.03241
25844	YIPF3	0.370723	5.67496	2.8666	0.00702159	0.0455273	-3.03697
284406	ZFP82	-0.343067	4.91358	-2.86644	0.00702448	0.0455273	-3.03735
6919	TCEA2	0.395179	5.73169	2.86581	0.00703575	0.0455732	-3.03883
6944	VPS72	-0.221159	7.76727	-2.86384	0.0070711	0.045775	-3.04345
6945	MLX	-0.36291	5.23035	-2.8605	0.00713126	0.046137	-3.05126
9415	FADS2	0.553617	8.08791	2.85971	0.00714563	0.0462024	-3.05312
54931	TRMT10C	0.518841	6.55955	2.85863	0.00716518	0.0463014	-3.05564
745	MYRF	-0.496694	4.41275	-2.85667	0.00720091	0.0464741	-3.06022
653689	GSTT2B	-0.579014	3.54385	-2.85667	0.00720105	0.0464741	-3.06024
100505687	LINC00888	0.275124	4.73509	2.85645	0.00720497	0.0464741	-3.06074
11062	DUS4L	-0.481735	3.61226	-2.85623	0.00720899	0.0464741	-3.06126
29114	TAGLN3	0.614473	5.23865	2.85412	0.0072478	0.0466966	-3.06621
22834	ZNF652	0.254873	5.95124	2.85228	0.00728174	0.0468875	-3.07051
57727	NCOA5	0.60554	4.84144	2.85103	0.00730484	0.0469821	-3.07343
57405	SPC25	-0.513457	3.24835	-2.85101	0.00730506	0.0469821	-3.07346
55333	SYNJ2BP	0.41547	4.50628	2.85066	0.00731164	0.0469966	-3.07429
1027	CDKN1B	-0.265492	6.09885	-2.84996	0.00732471	0.0470528	-3.07593
10383	TUBB4B	-0.396191	6.48337	-2.84603	0.00739799	0.0474943	-3.08511
4354	MPP1	-0.49528	3.80119	-2.84581	0.00740216	0.0474943	-3.08562
80012	PHC3	-0.445695	4.3619	-2.84459	0.00742505	0.0475878	-3.08847
8650	NUMB	-0.378945	5.06574	-2.84457	0.00742548	0.0475878	-3.08852
127703	C1orf216	0.40652	4.82111	2.84413	0.00743373	0.0476003	-3.08955
23644	EDC4	-0.310763	5.85709	-2.84391	0.00743789	0.0476003	-3.09006
165918	RNF168	-0.256653	6.57094	-2.84376	0.00744056	0.0476003	-3.09039
5747	PTK2	-0.257276	5.87602	-2.84296	0.00745566	0.0476496	-3.09226
56970	ATXN7L3	-0.222314	6.54888	-2.84289	0.00745701	0.0476496	-3.09243
2074	ERCC6	0.504295	3.46686	2.8423	0.00746813	0.0476926	-3.0938
5412	UBL3	0.354594	4.29941	2.8419	0.00747576	0.0476995	-3.09474
5833	PCYT2	-0.454426	4.17006	-2.84178	0.00747798	0.0476995	-3.09501
2630	GBAP1	-0.547351	3.63655	-2.84098	0.00749314	0.0477411	-3.09688
81614	NIPA2	-0.248531	6.20828	-2.84098	0.00749327	0.0477411	-3.09689
2317	FLNB	-0.600548	2.83632	-2.84022	0.0075077	0.0477917	-3.09867
55715	DOK4	-0.671009	3.98103	-2.83989	0.00751393	0.0477917	-3.09943
23332	CLASP1	0.317288	5.61027	2.83987	0.00751439	0.0477917	-3.09949
84969	TOX2	-0.541289	5.04815	-2.8387	0.00753658	0.0479048	-3.1022
55320	MIS18BP1	-0.244255	6.14597	-2.83843	0.0075417	0.0479094	-3.10283
65125	WNK1	0.269643	6.06184	2.83779	0.00755406	0.0479434	-3.10433
9518	GDF15	-2.1617	3.19656	-2.83754	0.00755886	0.0479434	-3.10492
54821	ERCC6L	-0.574233	3.6426	-2.83744	0.00756065	0.0479434	-3.10514
1601	DAB2	1.95319	0.331064	2.83723	0.00756468	0.0479434	-3.10563
2072	ERCC4	0.266823	5.45466	2.83649	0.0075788	0.0480049	-3.10734
51321	AMZ2	-0.402847	5.93271	-2.83611	0.00758615	0.0480235	-3.10824
54887	UHRF1BP1	-0.835595	4.18322	-2.83564	0.00759519	0.0480528	-3.10933
9459	ARHGEF6	-0.536358	3.29289	-2.83408	0.00762523	0.0482149	-3.11297
2023	ENO1	-0.31014	10.5916	-2.83378	0.00763098	0.0482232	-3.11366
381	ARF5	0.330434	6.80686	2.83341	0.00763825	0.0482411	-3.11454
11329	STK38	0.414651	5.58574	2.83241	0.00765754	0.0483349	-3.11686
11322	TMC6	-0.592616	3.69864	-2.83102	0.00768446	0.0484767	-3.12009
83940	TATDN1	-0.439355	4.78086	-2.83039	0.00769673	0.0485237	-3.12156
55148	UBR7	-0.269768	5.41661	-2.82973	0.00770949	0.0485237	-3.12309
10263	CDK2AP2	-0.239412	6.19562	-2.82961	0.00771193	0.0485237	-3.12338
51182	HSPA14	-0.260967	6.24136	-2.82951	0.00771385	0.0485237	-3.1236
3222	HOXC5	-0.599175	2.59038	-2.82949	0.00771421	0.0485237	-3.12365
8175	SF3A2	-0.477894	4.36734	-2.82866	0.00773036	0.0485972	-3.12557
25994	HIGD1A	0.246336	6.76133	2.8271	0.00776091	0.0487611	-3.1292
162	AP1B1	-0.294984	7.15771	-2.82616	0.00777939	0.048849	-3.13139
6571	SLC18A2	1.01057	2.59804	2.82536	0.00779508	0.0488975	-3.13325
440275	EIF2AK4	-0.296848	5.70926	-2.82531	0.00779609	0.0488975	-3.13337
1874	E2F4	-0.376961	5.37437	-2.82468	0.0078086	0.0489477	-3.13484
93621	MRFAP1	0.194079	9.34386	2.82443	0.0078134	0.0489496	-3.13541
84515	MCM8	-0.40383	4.44446	-2.8233	0.00783575	0.0490546	-3.13803
11066	SNRNP35	-0.379589	5.52321	-2.82313	0.00783918	0.0490546	-3.13844
5884	RAD17	-0.308981	4.96673	-2.82256	0.00785053	0.0490974	-3.13977
3209	HOXA13	1.99332	-0.748717	2.82144	0.00787269	0.0491913	-3.14236
57523	NYNRIN	0.650028	3.13823	2.82134	0.00787459	0.0491913	-3.14258
1491	CTH	-1.36005	2.68083	-2.82087	0.00788399	0.0492218	-3.14368
27301	APEX2	-0.451664	4.37324	-2.8201	0.00789929	0.0492724	-3.14546
65977	PLEKHA3	0.441127	3.99893	2.82001	0.00790115	0.0492724	-3.14568
25989	ULK3	0.23421	5.86152	2.81838	0.00793365	0.0494467	-3.14946
10285	SMNDC1	-0.19354	6.5839	-2.81806	0.0079402	0.0494543	-3.15022
57519	STARD9	-0.503408	3.21227	-2.81787	0.00794395	0.0494543	-3.15065
10657	KHDRBS1	0.198966	8.78942	2.81676	0.00796617	0.0495642	-3.15322
79155	TNIP2	-0.375083	4.27502	-2.81572	0.00798712	0.0496662	-3.15564
10159	ATP6AP2	0.209425	6.46023	2.81539	0.00799388	0.0496798	-3.15641
10892	MALT1	-0.610512	2.96077	-2.81497	0.00800218	0.049703	-3.15737
6746	SSR2	0.17884	8.57773	2.813	0.00804207	0.0499218	-3.16194
3482	IGF2R	0.521986	6.07371	2.81278	0.00804658	0.0499218	-3.16246
81853	TMEM14B	-0.252642	6.30982	-2.81205	0.00806135	0.049985	-3.16414
2990	GUSB	-0.38839	5.13051	-2.81126	0.00807738	0.0500559	-3.16597
10019	SH2B3	-1.06837	1.94016	-2.81032	0.0080967	0.050147	-3.16817
2847	MCHR1	-2.26857	1.08539	-2.80991	0.00810497	0.0501632	-3.16911
28232	SLCO3A1	-0.322755	4.62916	-2.80974	0.00810853	0.0501632	-3.16951
57510	XPO5	-0.303714	6.72908	-2.80914	0.00812063	0.0502095	-3.17088
221061	FAM171A1	0.230429	6.97229	2.80832	0.00813753	0.0502854	-3.17279
51172	NAGPA	-0.527784	3.85966	-2.8064	0.00817702	0.0504459	-3.17724
54505	DHX29	0.21506	7.01658	2.80629	0.00817927	0.0504459	-3.17749
4255	MGMT	-0.426243	5.49297	-2.80612	0.00818268	0.0504459	-3.17788
23258	DENND5A	-0.322814	5.12173	-2.80606	0.00818386	0.0504459	-3.17801
2281	FKBP1B	-0.482554	4.2645	-2.80593	0.00818668	0.0504459	-3.17833
115426	UHRF2	-0.384661	4.66794	-2.80493	0.00820719	0.0505436	-3.18063
29063	ZCCHC4	-0.362765	3.80092	-2.80434	0.00821947	0.0505606	-3.182
83606	GUCD1	-0.321197	6.21446	-2.80427	0.00822096	0.0505606	-3.18217
8337	HIST2H2AA3	-0.435917	4.98615	-2.80413	0.00822388	0.0505606	-3.18249
11151	CORO1A	-0.597932	4.25404	-2.80378	0.00823101	0.0505759	-3.18329
81928	CABLES2	-0.374883	4.28651	-2.80227	0.00826246	0.0507405	-3.1868
11168	PSIP1	-0.259093	9.42606	-2.80157	0.00827704	0.0508013	-3.18842
10927	SPIN1	0.270965	7.14207	2.8013	0.00828247	0.050806	-3.18902
10124	ARL4A	-0.437451	3.70212	-2.80095	0.00828977	0.0508221	-3.18983
5063	PAK3	0.693639	3.94918	2.79999	0.00830983	0.0509164	-3.19205
168451	THAP5	-0.341553	4.73319	-2.799	0.00833061	0.051015	-3.19435
37	ACADVL	-0.305056	6.33491	-2.7987	0.00833686	0.0510194	-3.19503
157567	ANKRD46	0.389919	4.88481	2.79852	0.0083407	0.0510194	-3.19546
196074	METTL15	-0.372914	4.2247	-2.79815	0.00834842	0.051038	-3.19631
10910	SUGT1	-0.201306	7.51288	-2.79727	0.00836691	0.0511222	-3.19834
4627	MYH9	-0.299739	6.10691	-2.79618	0.00838996	0.0512343	-3.20087
207063	DHRSX	-0.405773	3.88514	-2.79562	0.00840179	0.0512778	-3.20216
100422885	MIR1244-2	0.323197	6.72931	2.79436	0.00842827	0.0514022	-3.20505
5481	PPID	-0.235777	6.72541	-2.79421	0.00843162	0.0514022	-3.20542
1159	CKMT1B	-0.467362	2.30824	-2.79007	0.0085196	0.0519041	-3.21495
84085	FBXO30	-0.433654	4.0305	-2.78989	0.00852349	0.0519041	-3.21537
9829	DNAJC6	0.414548	4.27643	2.78923	0.00853759	0.0519609	-3.21689
23299	BICD2	0.300499	6.04703	2.78558	0.00861622	0.0524101	-3.22531
7150	TOP1	-0.214768	10.128	-2.78475	0.00863418	0.052461	-3.22722
114883	OSBPL9	0.277747	6.91621	2.78455	0.00863853	0.052461	-3.22768
2961	GTF2E2	-0.254626	6.30033	-2.78436	0.00864265	0.052461	-3.22812
26031	OSBPL3	0.414234	3.71891	2.78406	0.00864921	0.052461	-3.22882
27242	TNFRSF21	0.302815	5.67204	2.78393	0.00865196	0.052461	-3.22911
80213	TM2D3	-0.285397	6.40285	-2.78386	0.00865351	0.052461	-3.22927
57787	MARK4	-0.347892	6.11685	-2.78212	0.00869131	0.0526608	-3.23328
130872	AHSA2	-0.631896	3.36094	-2.7812	0.0087115	0.0527538	-3.23541
10166	SLC25A15	-0.488538	4.11354	-2.77971	0.00874395	0.0529208	-3.23882
4259	MGST3	0.50352	7.86056	2.77927	0.0087537	0.0529504	-3.23984
219402	MTIF3	0.280431	5.82576	2.77885	0.00876297	0.0529563	-3.24081
23338	JADE2	-0.757814	2.51645	-2.77878	0.00876441	0.0529563	-3.24096
401320	LOC401320	-0.599639	2.45332	-2.77778	0.00878639	0.0530597	-3.24326
728190	NUTM2A-AS1	-0.578164	3.36529	-2.77604	0.00882486	0.0532624	-3.24727
57124	CD248	-0.920379	2.35103	-2.77484	0.00885127	0.0533823	-3.25001
55841	WWC3	-0.369715	4.53282	-2.7747	0.00885454	0.0533823	-3.25035
3654	IRAK1	-0.287805	6.51679	-2.77444	0.00886024	0.0533871	-3.25094
64147	KIF9	-0.417519	3.93349	-2.7733	0.00888552	0.0535098	-3.25356
4938	OAS1	-1.74562	1.53677	-2.77291	0.00889415	0.0535321	-3.25445
6382	SDC1	0.508734	4.06232	2.76971	0.00896582	0.053905	-3.26181
54622	ARL15	0.603527	3.38771	2.76968	0.0089664	0.053905	-3.26187
55536	CDCA7L	-0.66138	3.43767	-2.76948	0.00897096	0.053905	-3.26234
4257	MGST1	-0.554606	5.66051	-2.76756	0.0090141	0.0541344	-3.26674
57584	ARHGAP21	0.390953	5.1602	2.7668	0.00903123	0.0542073	-3.26848
51705	EMCN	-1.43941	-0.105874	-2.76588	0.00905213	0.0543028	-3.2706
8266	UBL4A	-0.311119	5.35559	-2.7653	0.00906515	0.054351	-3.27192
10451	VAV3	1.09772	2.59765	2.7647	0.00907876	0.0544026	-3.27329
8795	TNFRSF10B	-0.617146	5.62031	-2.76431	0.00908767	0.054426	-3.27419
25824	PRDX5	0.496024	6.92077	2.76376	0.00910021	0.0544711	-3.27546
23139	MAST2	-0.353566	4.40563	-2.76223	0.00913505	0.0546496	-3.27896
25885	POLR1A	-0.401799	4.35524	-2.76135	0.00915516	0.0547158	-3.28098
65990	FAM173A	0.424125	4.04742	2.76131	0.00915617	0.0547158	-3.28108
8563	THOC5	-0.24711	5.70111	-2.76011	0.00918351	0.0548005	-3.28381
26751	SH3YL1	0.544443	3.3844	2.7601	0.00918389	0.0548005	-3.28385
6598	SMARCB1	-0.329688	5.41972	-2.76003	0.00918545	0.0548005	-3.28401
5371	PML	0.336089	4.87372	2.75946	0.0091984	0.054806	-3.2853
11133	KPTN	-0.357038	4.34601	-2.75942	0.00919945	0.054806	-3.2854
55635	DEPDC1	-0.28345	6.02555	-2.75933	0.00920153	0.054806	-3.28561
55916	NXT2	0.50654	2.92324	2.75911	0.00920653	0.054806	-3.28611
27095	TRAPPC3	-0.318426	6.95727	-2.75747	0.00924431	0.0550009	-3.28986
22847	ZNF507	-0.284562	4.87959	-2.7569	0.00925756	0.0550473	-3.29118
57184	FAM219B	-0.34797	5.32748	-2.7567	0.00926224	0.0550473	-3.29164
101927740	LOC101927740	0.63299	2.58852	2.75475	0.00930745	0.0552858	-3.2961
100616345	MIR4426	-0.371651	6.61428	-2.75433	0.00931713	0.0553131	-3.29706
147841	SPC24	-0.329072	5.73401	-2.75406	0.00932329	0.0553196	-3.29766
79019	CENPM	-0.353136	5.04494	-2.75201	0.00937109	0.055563	-3.30235
11147	HHLA3	-0.625205	2.89754	-2.75187	0.00937453	0.055563	-3.30268
84848	MIR503HG	-0.792733	3.18361	-2.74981	0.00942273	0.0558182	-3.30738
79191	IRX3	0.415091	5.31963	2.74955	0.00942881	0.0558239	-3.30797
7371	UCK2	-0.229681	6.50177	-2.74661	0.00949822	0.0562042	-3.31469
57695	USP37	-0.444692	5.00027	-2.74628	0.00950607	0.0562201	-3.31545
388695	LYSMD1	-0.264993	4.85735	-2.74438	0.00955124	0.0564566	-3.31979
4179	CD46	-0.296204	5.5581	-2.74392	0.00956203	0.0564695	-3.32083
57530	CGN	0.626881	2.83021	2.74368	0.00956791	0.0564695	-3.32139
1611	DAP	0.252222	5.61223	2.74353	0.00957136	0.0564695	-3.32172
79893	GGNBP2	-0.295318	6.8853	-2.74311	0.00958142	0.0564695	-3.32268
664	BNIP3	-0.797351	7.79583	-2.7431	0.00958171	0.0564695	-3.32271
7064	THOP1	-0.360545	6.16471	-2.74298	0.00958456	0.0564695	-3.32298
79699	ZYG11B	0.245484	5.99182	2.7427	0.00959129	0.0564786	-3.32363
9445	ITM2B	-0.222849	7.76224	-2.74074	0.00963826	0.0567109	-3.3281
10842	PPP1R17	1.86904	1.50007	2.74052	0.00964332	0.0567109	-3.32858
1416	CRYBB2P1	-0.444647	3.86621	-2.7404	0.00964638	0.0567109	-3.32887
6536	SLC6A9	-1.55233	1.37315	-2.7374	0.00971867	0.0571046	-3.33571
60678	EEFSEC	0.444471	3.53774	2.73718	0.00972385	0.0571046	-3.3362
7284	TUFM	0.337518	5.81129	2.73615	0.00974887	0.0571993	-3.33855
93349	SP140L	-1.43941	1.32757	-2.73608	0.00975047	0.0571993	-3.3387
3107	HLA-C	-1.73395	3.51183	-2.73584	0.00975647	0.0572036	-3.33926
10980	COPS6	-0.236073	6.61945	-2.73515	0.00977318	0.0572572	-3.34083
10226	PLIN3	-0.295903	6.17443	-2.73503	0.00977614	0.0572572	-3.34111
6572	SLC18A3	-0.601117	3.40578	-2.73327	0.00981885	0.057456	-3.3451
10456	HAX1	-0.369082	8.15035	-2.73299	0.00982586	0.057456	-3.34575
50859	SPOCK3	0.722971	1.85464	2.73281	0.00983031	0.057456	-3.34617
2070	EYA4	-0.402999	4.35022	-2.73277	0.00983119	0.057456	-3.34625
4054	LTBP3	0.354376	3.97957	2.73149	0.00986258	0.0575908	-3.34917
652	BMP4	1.13084	2.16404	2.7314	0.00986484	0.0575908	-3.34938
390	RND3	0.376634	6.03547	2.73058	0.0098848	0.0576764	-3.35123
92659	MAFG-AS1	-0.453423	4.05402	-2.72964	0.00990802	0.0577809	-3.35337
3014	H2AFX	0.741321	5.2474	2.72892	0.00992583	0.0578537	-3.35502
100189410	TRR-TCG2-1	0.30076	8.41851	2.7281	0.00994595	0.05794	-3.35687
23244	PDS5A	-0.234399	6.69261	-2.72735	0.00996455	0.0580172	-3.35858
7840	ALMS1	-0.325184	4.83748	-2.727	0.00997312	0.0580361	-3.35937
5394	EXOSC10	-0.294175	5.93284	-2.72678	0.00997876	0.0580379	-3.35988
172	AFG3L1P	-0.535984	3.99601	-2.72526	0.0100164	0.0582077	-3.36333
105376057	LOC105376057	-0.629946	2.9328	-2.72517	0.0100187	0.0582077	-3.36354
7414	VCL	0.293486	5.19776	2.72464	0.0100318	0.058253	-3.36474
85474	LBX2	0.517216	3.77797	2.72422	0.0100423	0.0582827	-3.36569
11018	TMED1	-0.331569	5.00932	-2.72156	0.0101087	0.0586368	-3.37172
5707	PSMD1	-0.229007	8.96093	-2.72118	0.0101182	0.058661	-3.37259
2523	FUT1	-3.01357	-0.459042	-2.72038	0.0101385	0.058717	-3.37442
128061	C1orf131	0.236724	5.89253	2.72027	0.0101413	0.058717	-3.37466
5993	RFX5	0.390377	6.67908	2.72016	0.0101441	0.058717	-3.37492
5523	PPP2R3A	0.454373	3.38083	2.71951	0.0101604	0.0587727	-3.37639
55958	KLHL9	0.262672	6.22327	2.71934	0.0101645	0.0587727	-3.37676
4913	NTHL1	-0.453456	4.97707	-2.71806	0.0101969	0.0589284	-3.37966
4734	NEDD4	-0.635982	3.32672	-2.71749	0.0102113	0.0589808	-3.38096
2314	FLII	-0.347316	4.11721	-2.71649	0.0102366	0.0590955	-3.38322
100462981	MTRNR2L2	0.64535	8.39997	2.71627	0.0102423	0.059097	-3.38373
27332	ZNF638	0.278377	7.35647	2.71532	0.0102664	0.0591919	-3.38588
10557	RPP38	-0.260013	4.96432	-2.7152	0.0102696	0.0591919	-3.38617
54499	TMCO1	0.340978	8.00836	2.71442	0.0102894	0.0592523	-3.38793
84532	ACSS1	-0.69359	3.06352	-2.71436	0.010291	0.0592523	-3.38807
9922	IQSEC1	0.438261	5.04186	2.71353	0.0103122	0.0593426	-3.38995
90427	BMF	0.555617	2.99556	2.71326	0.0103189	0.0593501	-3.39054
51517	NCKIPSD	-0.451601	3.8631	-2.71287	0.0103289	0.0593762	-3.39143
89978	DPH6	-0.747843	2.40051	-2.71222	0.0103455	0.0594404	-3.3929
8270	LAGE3	-0.287453	5.51583	-2.71175	0.0103576	0.0594699	-3.39396
22794	CASC3	-0.162391	7.60656	-2.7116	0.0103616	0.0594699	-3.39432
89796	NAV1	0.494566	6.45489	2.7113	0.0103693	0.0594829	-3.395
81490	PTDSS2	-0.532049	3.71215	-2.71052	0.0103893	0.0595461	-3.39676
987	LRBA	0.33776	4.93095	2.71044	0.0103913	0.0595461	-3.39694
2625	GATA3	-0.280243	9.66914	-2.70737	0.0104706	0.0599692	-3.40389
119710	C11orf74	-0.296448	5.65342	-2.70637	0.0104967	0.0600615	-3.40616
14	AAMP	-0.233188	7.12472	-2.70613	0.0105028	0.0600615	-3.40669
65996	CENPBD1P1	-0.32725	4.51694	-2.70611	0.0105033	0.0600615	-3.40674
7469	NELFA	-0.222084	5.83593	-2.70477	0.0105384	0.0602302	-3.40978
348926	FAM86EP	-0.523615	2.86736	-2.70454	0.0105443	0.0602326	-3.4103
3065	HDAC1	-0.247149	6.75628	-2.70378	0.010564	0.0602799	-3.412
26049	FAM169A	0.501164	4.31993	2.70359	0.0105691	0.0602799	-3.41244
79944	L2HGDH	-0.472492	4.07376	-2.70324	0.0105782	0.0602799	-3.41323
158160	HSD17B7P2	-0.610863	2.94621	-2.70319	0.0105796	0.0602799	-3.41335
9657	IQCB1	-0.51543	3.88078	-2.70316	0.0105803	0.0602799	-3.41341
6868	ADAM17	-0.169885	6.68486	-2.70213	0.0106072	0.0604015	-3.41573
4357	MPST	0.338208	6.06493	2.70128	0.0106295	0.0604969	-3.41765
91289	LMF2	-0.422108	5.08266	-2.7005	0.0106501	0.0605823	-3.41941
1912	PHC2	0.215267	6.14942	2.69847	0.0107036	0.060855	-3.424
64841	GNPNAT1	-0.358066	5.48255	-2.6975	0.0107294	0.06097	-3.4262
4283	CXCL9	-1.91199	2.18631	-2.69708	0.0107405	0.061001	-3.42714
252983	STXBP4	0.429117	4.5517	2.69547	0.0107832	0.0611844	-3.43077
55234	SMU1	0.223472	5.96296	2.69526	0.010789	0.0611844	-3.43126
9994	CASP8AP2	-0.245149	6.45261	-2.69523	0.0107896	0.0611844	-3.43131
124565	SLC38A10	0.289087	6.12169	2.69466	0.0108048	0.0612329	-3.43259
63875	MRPL17	0.349197	5.51044	2.69449	0.0108095	0.0612329	-3.43299
6650	CAPN15	-0.428406	5.16648	-2.69323	0.0108431	0.0613916	-3.43582
11099	PTPN21	0.525911	2.93238	2.69279	0.010855	0.0614095	-3.43683
55732	C1orf112	-0.306545	4.90374	-2.69257	0.0108608	0.0614095	-3.43731
3028	HSD17B10	0.219668	7.00036	2.69248	0.0108632	0.0614095	-3.43751
57157	PHTF2	-0.355476	5.03705	-2.69181	0.0108812	0.0614795	-3.43903
8648	NCOA1	0.397188	4.87822	2.69137	0.0108931	0.0615148	-3.44003
8835	SOCS2	1.03934	2.52783	2.68853	0.0109696	0.0619146	-3.44641
22841	RAB11FIP2	0.295642	6.0889	2.68612	0.011035	0.0622273	-3.45184
3761	KCNJ4	-0.956903	4.02099	-2.68607	0.0110365	0.0622273	-3.45196
54431	DNAJC10	0.216002	6.10848	2.68571	0.0110461	0.0622496	-3.45276
55585	UBE2Q1	0.198295	8.16166	2.6835	0.0111065	0.0625575	-3.45774
92703	TMEM183A	0.243308	5.40732	2.68323	0.011114	0.0625582	-3.45835
2664	GDI1	0.353539	7.03238	2.68308	0.0111181	0.0625582	-3.45869
3196	TLX2	0.283292	7.94315	2.68273	0.0111278	0.0625803	-3.45949
406	ARNTL	0.992495	2.38928	2.68181	0.0111529	0.062689	-3.46154
830	CAPZA2	0.469095	4.82547	2.68114	0.0111713	0.0627364	-3.46305
166647	ADGRA3	0.414359	5.40101	2.68109	0.0111729	0.0627364	-3.46317
339231	ARL16	0.800049	3.89017	2.68014	0.011199	0.0628508	-3.46531
11328	FKBP9	-0.356256	4.1194	-2.67975	0.0112096	0.0628512	-3.46617
6601	SMARCC2	0.247999	6.41783	2.67972	0.0112106	0.0628512	-3.46625
1809	DPYSL3	-0.192352	8.13779	-2.67795	0.0112594	0.0630919	-3.47021
257019	FRMD3	0.795094	2.78983	2.67755	0.0112706	0.0630978	-3.47112
7543	ZFX	-0.432153	4.16231	-2.67745	0.0112734	0.0630978	-3.47135
1958	EGR1	-0.926026	3.54494	-2.67713	0.0112824	0.0630978	-3.47207
285513	GPRIN3	-0.514206	4.15305	-2.67708	0.0112836	0.0630978	-3.47217
93487	MAPK1IP1L	0.251085	6.70188	2.6764	0.0113026	0.0631713	-3.4737
81610	FAM83D	-0.321696	5.52698	-2.6752	0.011336	0.0633209	-3.4764
340481	ZDHHC21	0.341416	4.70011	2.67502	0.011341	0.0633209	-3.4768
6262	RYR2	0.952018	2.98489	2.67468	0.0113504	0.0633409	-3.47755
54962	TIPIN	-0.342259	4.72789	-2.67371	0.0113776	0.0634017	-3.47974
5955	RCN2	0.370308	7.2382	2.67367	0.0113787	0.0634017	-3.47983
6683	SPAST	0.258835	5.53702	2.67367	0.0113787	0.0634017	-3.47983
7626	ZNF75D	-0.38914	3.33401	-2.67175	0.0114326	0.063669	-3.48413
23528	ZNF281	0.31491	7.11408	2.67132	0.0114448	0.0636936	-3.48511
9024	BRSK2	0.398025	4.41839	2.67118	0.0114487	0.0636936	-3.48542
23365	ARHGEF12	0.388161	4.64035	2.67068	0.0114628	0.0637395	-3.48654
79823	CAMKMT	-0.317587	4.08411	-2.66982	0.0114871	0.0638147	-3.48847
10966	RAB40B	0.49713	3.76359	2.66978	0.0114881	0.0638147	-3.48855
83700	JAM3	-0.259126	6.43997	-2.66949	0.0114962	0.0638274	-3.4892
892	CCNC	-0.229875	6.21475	-2.66921	0.0115043	0.0638396	-3.48984
55201	MAP1S	0.251776	5.70121	2.66819	0.0115331	0.063967	-3.49212
55256	ADI1	0.301945	5.37852	2.66657	0.0115791	0.0641592	-3.49575
81889	FAHD1	0.36699	4.94625	2.66656	0.0115795	0.0641592	-3.49578
389765	LOC389765	0.792737	2.07412	2.66594	0.011597	0.064223	-3.49715
23515	MORC3	0.331427	4.68622	2.66254	0.0116944	0.0647295	-3.50478
56965	PARP6	0.417666	5.69053	2.66208	0.0117075	0.0647693	-3.5058
573	BAG1	0.244147	6.50848	2.66143	0.0117263	0.0648401	-3.50726
4139	MARK1	0.327556	4.69487	2.66114	0.0117346	0.0648531	-3.50791
11060	WWP2	-0.399272	4.42191	-2.66056	0.0117514	0.0649132	-3.50921
51174	TUBD1	-0.418721	4.23451	-2.65998	0.011768	0.0649717	-3.5105
1831	TSC22D3	-0.940539	6.33927	-2.65898	0.0117969	0.0650985	-3.51274
8754	ADAM9	-0.627142	2.79137	-2.65754	0.0118387	0.0652957	-3.51595
100529855	ZNF625-ZNF20	-0.402931	4.30482	-2.6573	0.0118457	0.0653015	-3.5165
79675	FASTKD1	-0.237716	5.58869	-2.65556	0.0118964	0.0655474	-3.52038
3226	HOXC10	0.396329	5.20411	2.65501	0.0119124	0.0656024	-3.52161
5163	PDK1	-0.776093	4.7981	-2.65464	0.0119232	0.065609	-3.52244
7074	TIAM1	0.313448	5.88588	2.65456	0.0119256	0.065609	-3.52262
728855	LINC00623	1.32778	1.29337	2.65409	0.0119394	0.0656517	-3.52367
11188	NISCH	0.313253	5.05831	2.65165	0.0120108	0.0659989	-3.52911
392617	ELFN1	1.4083	1.16886	2.65144	0.0120171	0.0659989	-3.52958
80347	COASY	-0.245792	6.22066	-2.6512	0.0120242	0.0659989	-3.53012
57643	ZSWIM5	0.383743	3.33501	2.65111	0.0120268	0.0659989	-3.53032
22985	ACIN1	0.349537	7.21777	2.65036	0.0120488	0.0660864	-3.53198
5989	RFX1	-0.347575	4.67659	-2.64958	0.012072	0.0661577	-3.53374
84154	RPF2	-0.242016	6.95833	-2.64916	0.0120845	0.0661577	-3.53468
22895	RPH3A	-1.71479	0.43113	-2.64914	0.012085	0.0661577	-3.53471
8495	PPFIBP2	-1.83453	1.26432	-2.6491	0.0120862	0.0661577	-3.5348
80209	PROSER1	-0.330661	5.59353	-2.6476	0.0121308	0.066296	-3.53815
9929	JOSD1	-0.264684	5.18353	-2.64756	0.0121318	0.066296	-3.53823
1514	CTSL	0.466044	4.92106	2.64753	0.0121329	0.066296	-3.53831
79576	NKAP	-0.275316	6.61337	-2.64743	0.0121358	0.066296	-3.53853
117177	RAB3IP	0.384856	4.9456	2.64701	0.0121482	0.0663306	-3.53946
90417	KNSTRN	-0.243825	6.17658	-2.64606	0.0121764	0.0664423	-3.54157
5480	PPIC	0.547643	3.24342	2.64591	0.0121809	0.0664423	-3.54191
873	CBR1	0.354486	5.23973	2.64557	0.0121911	0.0664463	-3.54268
140735	DYNLL2	0.227004	7.51667	2.64548	0.0121938	0.0664463	-3.54288
8653	DDX3Y	-1.72173	2.31889	-2.64389	0.0122414	0.0666721	-3.54642
23118	TAB2	0.361204	6.17447	2.64339	0.0122565	0.0667208	-3.54754
[truncated: 8,883 more rows]
