# Supplementary material for: Druggable epigenetic suppression of interferon-induced chemokine expression linked to MYCN amplification in neuroblastoma
Source: J Immunother Cancer. 2021 May 20;9(5):e001335. doi: 10.1136/jitc-2020-001335 (PMC8141444; doi:10.1136/jitc-2020-001335)
Supplement: Supplementary data [file jitc-2020-001335supp006.xlsx]

## Sheet: EPZ011989_response_signatures
	Up_By_EPZ011989	Down_by_EPZ011989
1	DCX	KCNJ8
2	CELF2	ASS1
3	FAM78B	PRSS12
4	SIX1	TMEM120A
5	HOXA5	SERINC5
6	CACNG7	CDC25B
7	NEO1	NXPE3
8	MAGED2	CHCHD10
9	TNRC18	FAM189B
10	SOX4	FTL
11	EBF1	HSBP1L1
12	SERTAD4	GCAT
13	MSX1	SNAPC5
14	LIX1	PANK3
15	YBX3	FAM72B
16	HOXA11	SFXN4
17	RFTN1	SLC29A1
18	MXD4	HMMR
19	MAFB	HDGF
20	AUTS2	MTIF2
21	FZD2	INHBE
22	NR2F2	IMPDH1
23	MYO6	ZNF217
24	NRXN1	EP300-AS1
25	NR2F1	FAM72C
26	TRIB2	MTHFD1
27	BACH2	AK2
28	IGFBP5	RRP7A
29	RAB31	ME1
30	PIGM	PPP1R3B
31	NRN1	CEP44
32	ELAVL2	HOXC5
33	HOXA13	ABCB6
34	ZIC2	TLCD1
35	SERINC2	AURKB
36	CXorf57	FOSL2
37	CHODL	TPP1
38	MAGED4B	MFSD2B
39	DCHS1	PIGS
40	KAZN	TRAP1
41	PLXNA4	EXOSC4
42	HES1	TRPM3
43	NLGN4X	PCMT1
44	NKX3-2	HK2
45	SLC22A17	ARHGEF6
46	CHCHD7	REEP2
47	ZNF467	NUP155
48	TSC22D1	NME3
49	ATOH8	E2F1
50	HOXC13	TFB1M
51	LAPTM4A	AURKA
52	STMN2	DIMT1
53	SIX4	PRDX1
54	ZNF428	DNPH1
55	BTG2	TUBB4B
56	BAZ2B	RNASEH2A
57	JUP	ATAD2
58	NDRG2	PTTG1
59	NTRK1	EXOSC7
60	CCDC3	CKS1B
61	ELMO2	PTGES3
62	DLX1	SMS
63	POU3F1	DDX21
64	NRP2	FTH1
65	SVIL	HRASLS
66	FOXC1	ATP1B3
67	ZFHX4	ENO2
68	STOX2	CDCA3
69	TGFBR1	NFS1
70	CLIP3	TATDN1
71	GNG2	MASTL
72	MAPRE2	NUDT4P2
73	CIRBP	SNRPA1
74	ARID1B	CCDC28B
75	FRMD6	MAK16
76	LOC728392	CLEC2D
77	RHOBTB3	GBAS
78	MIDN	TAF5
79	FAM110B	DNAJC2
80	TCAF1	RCCD1
81	CXCL12	CCNB2
82	PXDN	CDKN3
83	HOXD10	BBIP1
84	LOC642852	NAMPT
85	ETV6	MTHFD1L
86	NT5C2	OIP5
87	MAF	MCM8
88	LIMCH1	COQ3
89	USP11	DDIT3
90	POU4F1	ASCL1
91	CREB5	DARS2
92	EGFLAM	SCARA3
93	PLAGL1	AGTRAP
94	CHRNB2	LARS
95	EID1	RIMS3
96	TBC1D30	DIAPH3
97	ZEB2	PRR11
98	IFT57	RHEBL1
99	FLRT3	CHAC1
100	HNRNPA0	EI24
101	PTPRK	PRIM1
102	FAM89B	FARSB
103	PIK3R3	REXO2
104	NRXN2	ENO3
105	TP53INP1	AIFM1
106	BATF3	ERP29
107	ATP2B1	EIF2AK1
108	CRLF1	ABCB7
109	PDE9A	NECTIN3
110	ATP8A2	CCDC71L
111	OSBPL10	SLC39A4
112	DACH1	RANBP1
113	WDR86	COX17
114	TLE1	TRIM52-AS1
115	SOX11	NDC1
116	THSD7A	PTPMT1
117	MYADM	MLST8
118	SOCS3	ADAT2
119	PRKAR1A	SORD
120	MFAP2	NAT10
121	IGSF9	ATF3
122	DLX2	NUF2
123	RHOC	PSRC1
124	PHF14	ASPH
125	NYNRIN	UQCC2
126	TMTC1	TTL
127	JARID2	NPM3
128	DYRK1B	TEX19
129	CKAP4	METTL21A
130	BRD2	PGAM4
131	MCF2L	TMEM186
132	SPATS2	ARHGAP11A
133	PRICKLE1	PRKAR2A
134	KIF26B	MRPS34
135	FZD7	RNASEH1-AS1
136	DDX5	CWH43
137	SMOC1	NUP210
138	SNAP25	MYO19
139	RBFOX2	SCARB1
140	PTPRO	CWF19L1
141	SEMA6A	ENKD1
142	CADM1	SSSCA1
143	EFNB2	TIMM9
144	DAB2	ISG20
145	BRD3	RAB12
146	LEPROT	KIF20B
147	ATP9A	FANCI
148	PLAG1	CENPH
149	FAM217B	MRI1
150	NEFM	PLTP
151	TMOD2	SFT2D1
152	NTRK2	JTB
153	KDM5B	GDF15
154	KISS1R	TMEM79
155	INA	FAF1
156	MMP2	RAD51
157	SSR2	SLC7A5
158	LOXL1	ARHGAP19
159	MDGA1	GPD2
160	FILIP1L	TMEM223
161	TSHZ3	HEXB
162	NCK2	DNPEP
163	PATZ1	BCAS4
164	ARHGAP29	SLC35A3
165	GLIDR	SOD2
166	PNRC1	TMEM14B
167	TSSC4	ECI2
168	FOXP1	GPANK1
169	GDF11	PTCHD4
170	THUMPD1	LAS1L
171	CHSY1	ALDOC
172	GOLIM4	EXOSC1
173	PTPN1	PIM3
174	MSI2	RPA3
175	BEX1	ARIH2
176	CHD4	WARS
177	CNTFR	NAAA
178	TNIK	MTFMT
179	GRINA	METTL10
180	MGRN1	MRPS30
181	FNIP2	OLMALINC
182	MBTPS1	PAICS
183	TAF7	POC1A
184	SLIT2	RFXAP
185	FAM122A	COQ2
186	MAB21L2	C5orf34
187	CHD1L	PSME2
188	TNRC6C	RAD51AP1
189	TMSB10	FANCE
190	PLXNA2	MALSU1
191	CUX2	MEA1
192	CDH2	DUS4L
193	DICER1	PPP1R35
194	HEXIM1	MINCR
195	EML1	PRDX4
196	TMEM59L	POC1B
197	CST3	SLC2A4RG
198	MAST4	TRIM9
199	NAGK	SLC37A4
200	IGLON5	NARS
201	GNB5	COA1
202	SRSF8	CYB5RL
203	PIP5K1C	SLC7A1
204	ID1	NME4
205	NBPF14	FAM219A
206	PIK3R1	RTN4IP1
207	ITGA3	TMEM209
208	MYO5A	RPE
209	SELENOW	CDCA8
210	C12orf57	APOL6
211	TECPR2	LRP4
212	PCSK1N	HSPA4
213	PLCL1	EMG1
214	CCNJL	TTC33
215	MAGED1	TMA16
216	LARGE1	SLC48A1
217	VPS28	E2F2
218	FAM127A	PITPNC1
219	FAM126A	TMEM51
220	PPP3CA	TACC3
221	TMEM98	YWHAE
222	ZMYM2	PDAP1
223	SYT11	RNF168
224	SLC6A17	KIF20A
225	THSD7B	ANKRD39
226	KCNMA1	CCT8
227	CYTH2	DAZAP1
228	TSPYL1	TAMM41
229	KIAA0922	IPO5
230	DAPK3	RNF145
231	LEMD3	WDR4
232	TSPAN13	ACOT7
233	HNRNPA1	SLC3A2
234	PUM1	DSN1
235	SORL1	AFMID
236	DUSP22	CDR2L
237	EPC2	NOD1
238	SRGAP1	BCL2L12
239	B2M	LINC01224
240	PDZRN3	AK6
241	NAB1	SLC1A5
242	PCMTD2	HJURP
243	LOC90246	KIAA0101
244	SGTA	GGCT
245	GSK3B	KLF7
246	EBF4	ELP2
247	ALK	MXD3
248	CADM4	PIR
249	MLLT3	ARL4D
250	MAN1A2	RHBDD1
251	ANK2	AGPS
252	MAP4K4	TBL1XR1
253	TNNT1	ESPL1
254	KALRN	AKIP1
255	TOX3	SLC4A1AP
256	SEC62	SCO1
257	GPX8	RWDD4
258	SYMPK	XPO6
259	KCNK2	PCK2
260	MARCH6	CNOT1
261	NBAT1	CSNK2B
262	SNX18	TAPBPL
263	DPYSL5	ATL3
264	MECOM	COLGALT1
265	PRRC2A	CNIH4
266	CDK5R2	NR2F6
267	SOX12	TSEN34
268	CHST11	NAA25
269	CD59	UBE2D2
270	HSDL1	PGK1
271	STX1A	KMT5A
272	UNC79
273	ING4
274	NRBP1
275	LRRN3
276	LSM7
277	FKBP10
278	MGAT4A
279	CD47
280	APCDD1L
281	NBPF15
282	ZNF697
283	MBD3
284	C11orf87
285	BCL11A
286	INSM1
287	ATXN7L3B
288	C4orf48
289	IFT27
290	HNRNPK
291	DLL1
292	GAP43
293	PDE4D
294	EBF3
295	MRFAP1L1
296	RIPK1
297	CYFIP2
298	CMTR2
299	CHMP2B
300	PLPP3
301	KLC1
302	USP27X
