# Supplementary material for: Druggable epigenetic suppression of interferon-induced chemokine expression linked to MYCN amplification in neuroblastoma
Source: J Immunother Cancer. 2021 May 20;9(5):e001335. doi: 10.1136/jitc-2020-001335 (PMC8141444; doi:10.1136/jitc-2020-001335)
Supplement: Supplementary data [file jitc-2020-001335supp007.xlsx]

## Sheet: Blatt 1 - Combi_overlap_across_
	Up_By_UNC-0638+EPZ011989	Down_By_UNC-0638+EPZ011989
1	FAM78B	ZNF667
2	DCX	ASS1
3	SCG3	LINC01224
4	CACNG7	HMMR
5	ELAVL2	HSBP1L1
6	NRXN1	YDJC
7	CELF2	PRSS12
8	CHRNB2	ZNF667-AS1
9	CHODL	EYA1
10	IFT57	LRP4
11	SIX1	NUSAP1
12	SRRM4	PRR11
13	HMP19	ZNF766
14	NDRG2	STAC
15	BEX1	METTL8
16	SCN3B	SLC39A4
17	NEO1	HES7
18	MSX1	EXOSC7
19	CD33	HDGF
20	ATCAY	H19
21	CELF3	CCNB1
22	ARNT2	GAL
23	SYT14	BCL2L12
24	INA	MTHFD1
25	YBX3	MIS18BP1
26	MXD4	ZNF320
27	IFI6	CEP44
28	SLC22A17	NUP155
29	NRN1	MTIF2
30	GDAP1	SOD1
31	CDK5R2	TRAP1
32	PIGM	AK2
33	MAGED2	TXLNG
34	MAFB	AGTPBP1
35	SNAP25	PIK3C3
36	MAPRE2	REXO2
37	RUNDC3A	ZNF611
38	AUTS2	ANAPC5
39	PAK3	PTTG1
40	TNRC18	TEX19
41	TSHZ2	ANP32E
42	SERINC2	PLIN2
43	LIX1	RFLNB
44	CPLX1	ZNF420
45	SYP	XPO1
46	FNIP2	AURKB
47	ITGA3	ZNF616
48	CHCHD7	CCNB2
49	ING3	DHX40
50	CREB5	CCDC77
51	HOXA11	CEP55
52	PCSK2	GMPS
53	NR2F2	RCCD1
54	PTPN3	CDK1
55	TMOD2	ADNP2
56	ZNF503	RAD18
57	ZNF467	PTGES3
58	SOX4	ATAD2
59	RAI14	DCUN1D2
60	NEFM	PPP1R3B
61	NLGN4X	LARS
62	PCSK1N	IMPDH1
63	SERTAD4	CCDC34
64	ARMCX3	ZNF217
65	DYRK1B	METTL15
66	TMTC1	SRPK1
67	TSC22D1	GEMIN5
68	RGL1	EEF2K
69	KCNK3	ARHGEF6
70	PKIB	TFB1M
71	TBX2	NAT10
72	ELMO2	SASS6
73	JUP	SSB
74	CXorf57	ARHGAP19
75	TMPRSS15	FAM72B
76	PCAT19	NOLC1
77	RAB11B	ZNF850
78	JARID2	WDHD1
79	ZNF428	BRCA1
80	SSTR2	RNASEH2A
81	STAT1	AURKA
82	STOX2	RAD51
83	FABP3	SMS
84	NR2F1	RPS6KA3
85	TMX4	RHEBL1
86	ESRRG	RFC1
87	MAGED4B	ENOSF1
88	BTG2	ABCE1
89	ULK3	NME4
90	KCNMA1	COA7
91	STMN2	ZNF260
92	HOXC13	LAS1L
93	RHOC	ASPH
94	SYT11	NMT2
95	UNC79	HK2
96	PYGO2	TKT
97	PTPRO	AGTRAP
98	ATOH8	APRT
99	FNDC5	TRIM65
100	LOC728392	GBAS
101	STX3	KIAA0101
102	KIF3C	ZNF480
103	TMEM59L	ZNF569
104	SHC2	DAP3
105	NT5C2	CDKN3
106	TNIK	CEBPZOS
107	HES1	DDX21
108	ARFGAP1	CTNNAL1
109	MSX2	HRASLS
110	MAPK8IP2	MRPS30
111	TMEM57	PLTP
112	TBC1D30	PKN3
113	GCHFR	KIF20B
114	SEL1L3	GUF1
115	CELF4	ZNF75A
116	DCHS1	BUB1
117	LOC642852	METAP1
118	RHOBTB3	HSPD1
119	KAZN	PGAM4
120	SYBU	UCHL5
121	DAAM1	ECI2
122	SLC6A17	MCM8
123	DAB2IP	NUP210
124	CTNNA2	DEPDC1
125	TRO	SOX2
126	DIRAS1	HJURP
127	STRIP1	DDX18
128	PLCB4	PRDX6
129	REC8	NDC1
130	POU4F1	EXOSC5
131	NFKBIA	RMI2
132	VGF	LPAR3
133	NCALD	KLF7
134	EID1	CDCA3
135	UBE2Q1	CALML4
136	ELFN1	PAICS
137	TP53INP2	PRDX1
138	FAM89B	GTF3A
139	ARMCX6	FKBP4
140	SPOP	KIF9
141	DYNLL2	ENO1
142	ALCAM	FKBP5
143	C11orf95	UBE2C
144	CYTH2	IPO7
145	C16orf52	UTP18
146	TRIB2	PRIM1
147	TGFBR1	TTK
148	RHOB	CKS1B
149	QPRT	DLGAP5
150	CPE	TAF5
151	LIMCH1	RRP7A
152	LAPTM4A	STAG3
153	CD47	PRKD2
154	PIK3R3	PHF19
155	ATP1A3	LYAR
156	GLIDR	ZNF773
157	PTEN	ABCB7
158	CLIP3	KIAA1143
159	ATP8A2	FAM72C
160	MAPRE3	PDS5A
161	BACH2	GPANK1
162	FMN1	NCAPD2
163	LEPROT	RBFA
164	ATP6V1G1	PUS7
165	RYR2	KIF23
166	NKX3-2	CLIC4
167	CRLF1	SLC29A1
168	IGSF8	AHCTF1
169	STX1A	FBLN1
170	SCAMP5	MASTL
171	AASS	ZNF678
172	ZIC2	TPX2
173	USP11	ZNF317
174	KLHL9	DIAPH3
175	ARID1B	SLC2A4RG
176	GPC1	ZNF496
177	TP53INP1	ZNF419
178	TCEAL9	CENPE
179	TUG1	RANBP1
180	LARGE1	PA2G4P4
181	SUSD5	MAK16
182	C14orf1	ALKBH2
183	RGAG4	MYO19
184	FAM110B	COQ3
185	LINC01088	ZFP82
186	TMEM108	TLCD1
187	CPS1	CLEC2D
188	DNAJC5	USP39
189	RB1CC1	RFC3
190	PLXNA2	ZNF160
191	BMF	PTK7
192	PRKAR1A	PRDX4
193	GRINA	THOC5
194	SUCO	CDCA7L
195	TCAF1	VRK1
196	PLAGL1	DNPEP
197	FOXC1	PSMG1
198	IGSF9	KDM3A
199	MAPK10	PTPMT1
200	SPIN1	EXO1
201	GAP43	CDCA2
202	MICALCL	TBL1XR1
203	KISS1R	HPRT1
204	SYT4	EBNA1BP2
205	PIK3R1	PGK1
206	NAGK	DOCK6
207	ZFHX4	UGCG
208	TRNP	RFXAP
209	NCOA1	ELP2
210	IFT27	ATR
211	HIST2H4B	FRZB
212	FBXW5	SSH2
213	SEMA6A	KIF2C
214	PPIC	ANKRD18B
215	GRIK2	SNRPA1
216	FAM171A2	ESPL1
217	THSD7A	PVT1
218	GDF11	NAA25
219	RRAGC	ZNF614
220	MVD	TUBB4B
221	MAF	PALM
222	JUND	GLO1
223	CST3	ZNF566
224	EBF4	WDR76
225	ZMYND11	SLC10A4
226	CUX2	NPM1
227	KRCC1	PPID
228	EGFLAM	CWF19L1
229	FAM127A	ADSL
230	PCDH9	KNSTRN
231	SREBF2	WHSC1
232	CD59	EIF5A2
233	GNB5	KCNJ11
234	TMCC2	HIST1H4C
235	NPAS3	WDR4
236	LRRN2	SMIM4
237	SGTA	KIF15
238	FAM217B	COL6A2
239	DDX5	WEE1
240	WSB1	NUDT4P2
241	LONRF2	SEH1L
242	FAM122A	PSRC1
243	CYP51A1	EXOSC4
244	GNG2	FAM72D
245	BAZ2B	PPAT
246	HEXIM1	FAM83D
247	BRD2	VDAC1
248	VPS28	TOP2A
249	STMN3	ZNF562
250	TRIM13	RNASEH1-AS1
251	PLEKHO1	DNAJC2
252	KALRN	CENPH
253	KMT5B	NPM3
254	ETV6	NSMCE4A
255	PPP3CA	HDDC3
256	MYO5A	RPF2
257	CTTNBP2NL	ADAMTS4
258	USP22	NXPE3
259	SVOP	MELTF
260	KLC1	ZNF268
261	MIDN	DZIP1L
262	LUC7L	PA2G4
263	ALK	PTK2
264	SLC4A8	PACSIN3
265	SLIT1	TTC27
266	NORAD	CWH43
267	LOC101928626	POC1B
268	PARVA	CCT8
269	YWHAH	NXN
270	ATP6V0E2	ADA
271	IRGQ	MTSS1L
272	SERINC1	E2F1
273	KIAA0141	G2E3
274	MYADM	RPA3
275	IGFBP5	NFIC
276	NFATC4	LDB2
277	ARL15	RTTN
278	TCEAL8	DDX10
279	XPA	ZNF101
280	FILIP1L	VEGFC
281	SRSF8	DPCD
282	PNRC1	CCNA2
283	ZNF462	FOSL2
284	PLAG1	GTF2IRD1
285	FILIP1	RNASET2
286	SC5D	ZNF426
287	DLX2	RUVBL2
288	MSI2	TSPO
289	HSBP1	FSCN1
290	MAN1A2	ATIC
291	MGAT4A	LOC341056
292	MARCH9	SEC63
293	GSK3B	CNOT6
294	TM7SF2	ABCB6
295	SLC2A6	MALSU1
296	MGST3	TAMM41
297	KLHDC8B	NLE1
298	TSPYL1	SLC4A5
299	ATP2B1	DCUN1D4
300	ARNTL	LINC00839
301	KIF26B	ZNF43
302	RBMS1	P4HA1
303	HNRNPA0	SNRPA
304	LPGAT1	CSTF3
305	ACP2	SCARA3
306	MCF2L	SLC37A4
307	STRA6	NUF2
308	JAKMIP2	THAP4
309	NTRK1	ANAPC1
310	SEC62	GINS1
311	ARL2BP	SETD7
312	PIP5K1C	ARL4D
313	FDFT1	PDCD2L
314	CIRBP	NDUFAF2
315	TSPYL4	ATF7IP2
316	DUSP4	TRE-CTC1-1
317	HGSNAT	RBL1
318	CC2D2A	NRARP
319	TMSB10	CTH
320	NOVA1	CEP57
321	TUSC3	TTC9C
322	BTBD10	CLPX
323	CYFIP2	ZNF555
324	SEPT3	RAB12
325	MARK2	SLC35A3
326	NRBP1	GPR180
327	DCAF8	POC1A
328	SELENOW	USP45
329	HS3ST5	ZNF263
330	EPC1	BAG2
331	HOXD10	ZNF354C
332	RAB30	ZNF670
333	TECPR2	GTF2E2
334	ADD1	SEPT11
335	CD63	NLGN2
336	SHROOM3	MTHFD1L
337	UBTF	CSNK2A3
338	TRIM44	LACTB
339	RALB	CHRNA9
340	EPC2	CCDC136
341	PRPF6	ERP29
342	NBPF15	OPA1
343	RFX5	YWHAE
344	SNX14	FANCI
345	TNRC6C	MIPEP
346	DUSP22	MAP4
347	KANSL3	BUB1B
348	FADS2	ALG3
349	ACTR10	GALM
350	SMIM14	FBL
351	DDX17	RP9P
352	KDM5B	TXNDC17
353	PTPN1	SAE1
354	PPM1F	DIMT1
355	HIST2H2BE	SSSCA1
356	TSSC4	SRP72
357	ZNF827	RFC2
358	ABAT	MFSD2B
359	MAB21L2	NUDT4
360	MMADHC	TCFL5
361	ID1	DUS4L
362	COX1	E2F2
363	C1orf122	TIGD1
364	RNR2	MITD1
365	PTTG1IP	SFT2D1
366	APBA1	BNIP3
367	RTN2	TMA16
368	TMX2	NUDT5
369	GRN	XPO6
370	SVIP	SIN3A
371	TBC1D10B	GABPB1
372	LTBP3	CHEK2
373	DAPK3	DARS2
374	BCAP29	MRPS18C
375	INSR	ZNF486
376	SERINC3	SHMT1
377	GORAB	GPN1
378	CAMK2N1	METTL21A
379	TSPAN3	KRAS
380	PHACTR2	PMS1
381	CACFD1	KATNB1
382	ENTPD4	CA14
383	FAAP20	PPP1R14B
384	ID2	PCMT1
385	GSTZ1	ADAMTS2
386	TIMP2	MTHFD2
387	SRSF5	NUDT2
388	MECOM	ZNF274
389	PFKFB2	GPN3
390	BCAN	CCDC59
391	PRMT6	YARS2
392	BAIAP2	CARM1
393	UFC1	SORD
394	RIPK1	TMEM209
395	RRAGA	USP37
396	NCAM1	SCARB1
397	NT5E	ERFE
398	LEMD3	FANCG
399	DHCR7	CENPK
400	PACS2	SETD6
401	C12orf57	CHAF1B
402	FAM222B	PGAM1
403	DCAF5	KNTC1
404	TMEM9B	NOA1
405	TUBB2B	RFWD3
406	ZNF33B	CDC25C
407	PPP1R12A	ARHGAP11A
408	MRFAP1L1	TATDN1
409	SMAD5	SNAPC5
410	ID3	NFKB2
411	MYO6	ZNF772
412	LSM7	CSE1L
413	CCNJL	SPC25
414	CYP20A1	MSH6
415	LOXL1	PREP
416	EIF4G2	TACC3
417	STXBP5	RTN4IP1
418	MIR6723	SPAG5
419	IRX3	METTL10
420	MTRNR2L1	CWC27
421	CCDC93	NOD1
422	B2M	PSIP1
423	WDR13	ZNF675
424	TST	ATL3
425	NDFIP2	FARSB
426	POGLUT1	MRPS34
427	C9orf135	BIRC5
428	UAP1L1	SLC7A5
429	BSDC1	KIF22
430	DNMT3A	FKBP1B
431	DVL3	GTPBP4
432	FAM229B	HIRIP3
433	VEZT	GMNN
434	RARA	GART
435	CRIPT	BAG4
436	MGRN1	MINCR
437	FAIM2	CDT1
438	PCNX2	ATF5
439	SSR2	HAUS6
440	NPDC1	KMT5A
441	PHF2	COQ2
442	CIAPIN1	MRPL37
443	DTX3L	ZNF232
444	UBE2H	HIST1H1E
445	TFAP2A	ORC1
446	OGDH	ZNF226
447	NACAD	BRIP1
448	FASTK	EIF2AK4
449	SREK1	TAF6
450	DCLK3	ATP1B3
451	HSDL1	CNIH4
452	NDUFA9	EMG1
453	MOXD1	ZNF354A
454	ANKRD13A	SDCCAG3
455	MFAP2	KIF14
456	ATP6V0B	CAD
457	TRNF	TSR1
458	HCP5	ADAT2
459	COPG1	NDUFAF7
460	STARD4	CTNNBL1
461	IFI16	DPAGT1
462	ST18	COLGALT1
463	UBC	DPH6
464	MCL1	SLC1A5
465	ASTN1	WDR74
466	MAP4K4	ZCCHC9
467	TIA1	LOC389765
468	NSG1	UCK2
469	NOL4L	IPO5
470	SPATA20	TRABD
471	MAD2L2	HSPA4
472	ZFAND5	PLCD3
473	SYT17	DBF4B
474	CSNK1D	MTFP1
475	GNA11	DNAJA3
476	CASD1	HSDL2
477	OSBPL10	ITPRIP
478	ARHGAP29	SH3PXD2B
479	LDB1	TOR4A
480	LOC101930085	VPS11
481	LCOR	APOL6
482	PHF20L1	RAB5C
483	RAB18	DHFR
484	ARHGEF28	INVS
485	PPP2R2B	WARS
486	WDR86	CDCA7
487	EML1	SNRPC
488	R3HDM4	ASF1B
489	TMEM98	ERCC6L
490	SOBP	FAM219A
491	NDUFA8	PDAP1
492	CUL4B	ZC3HAV1
493	NAB1	METTL21B
494	RSPO4	CHEK1
495	CHD4	ARHGAP28
496	CHMP2B	DSCC1
497	SRGAP1	ARRDC3
498	OSBP	RFT1
499	TSHZ3	KIF27
500	ICA1	CORO1A
501	LRFN4	POLA2
502	CMTM6	MIS18A
503	CMTR2	HAUS5
504	SGSM3	PLEKHG3
505	PTMS	ZNF551
506	TRIM24	TFAP4
507	GFRA2	STX10
508	SOX12	ERLIN1
509	ROBO1	TIMM50
510	TPCN2	SNRPB
511	RAB14
512	KCNH7
513	NCOA5
514	TMEM150A
515	CHST8
516	LRP12
517	SNX18
518	CHPF
519	GSE1
520	NAP1L5
521	SPOCK3
522	IVD
523	NSDHL
524	DQX1
525	CCNG2
526	ARF5
527	PRICKLE1
528	ADRA2A
529	VAMP2
530	PTRHD1
531	C5orf56
532	OSTM1
533	ATP5D
534	SAT2
535	NRSN2
